# Supplementary material for: Ruthenium-catalyzed oxidative C–H alkenylation of aryl carbamates
Source: Royal Society of Chemistry journal article supplement (doi:10.1039/c2cc36196e), 2012-01-01

## Supporting Information

# Ruthenium-Catalyzed Oxidative C–H Alkenylation of Aryl Carbamates

Jie Li, Christoph Kornhaaß and Lutz Ackermann\*

Institut für Organische und Biomolekulare Chemie, Georg-August-Universität,

Tammannstrasse 2, D-37077 Göttingen (Germany)

Fax: +49/ 551-39-6777

E-mail: Lutz.Ackermann@chemie.uni-goettingen.de

<http://www.org.chemie.uni-goettingen.de/ackermann/>

|                                                                                                   |     |
|---------------------------------------------------------------------------------------------------|-----|
| General remarks.....                                                                              | S2  |
| General Procedures A and B: Ruthenium Catalyzed Oxidative Alkenylation<br>of Aryl Carbamates..... | S3  |
| Preparation and Characterization of Products <b>3</b> .....                                       | S6  |
| Deprotection of Carbamate <b>3a</b> .....                                                         | S30 |
| Intermolecular Competition Experiment with Carbamates <b>1n</b> and <b>1af</b> .....              | S31 |
| Intermolecular Competition Experiment with Carbamates <b>1h</b> and <b>1j</b> .....               | S33 |
| References.....                                                                                   | S34 |
| <sup>1</sup> H and <sup>13</sup> C NMR-Spectra.....                                               | S35 |

## General remarks

Catalytic reactions were carried out under a N<sub>2</sub> atmosphere using pre-dried glassware. Aerobic catalytic reactions were carried out under air. 1,2-Dimethoxyethane (DME) was dried and distilled over Sodium. All aryl carbamates were synthesized according to a previously described procedure.<sup>1</sup> Other chemicals were obtained from commercial sources and were used without further purification. Yields refer to isolated compounds, estimated to be > 95% pure as determined by <sup>1</sup>H-NMR and GC-analysis. Chromatography: Merck silica gel 60 (40-63 μm). NMR: Spectra were recorded on Varian Unity 300, Mercury 300 or Inova 500 in the solvent indicated; chemical shifts (δ) are reported in ppm. All IR spectra were taken on a Bruker FT-IR Alpha device. MS: EI-MS-spectra were recorded with Finnigan MAT 95, 70 eV; High resolution mass spectrometry (HRMS) with APEX IV 7T FTICR, ESI-MS: Finnigan LCQ, Bruker Daltonic. M.p.: Stuart melting point apparatus SMP3, Barlworld Scientific, values are uncorrected.

## General Procedure A: Ruthenium-Catalyzed Oxidative Alkenylation of Aryl Carbamates

A suspension of *m*-tolyl *N,N*-dimethylcarbamate (**1a**) (89.6 mg, 0.50 mmol), ethyl acrylate (**2a**) (100 mg, 1.00 mmol), [RuCl<sub>2</sub>(*p*-cymene)]<sub>2</sub> (7.7 mg, 2.5 mol %), AgSbF<sub>6</sub> (17.2 mg, 10 mol %) and Cu(OAc)<sub>2</sub>·H<sub>2</sub>O (200 mg, 1.00 mmol) in DME (3.0 mL) was stirred at 110 °C for 24 h under an atmosphere of N<sub>2</sub>. At ambient temperature, EtOAc (15 mL) was added and the mixture was filtered through silica. The solvents were removed *in vacuo*. Purification of the remaining residue by column chromatography (*n*-hexane/EtOAc: 10/1→5/1) yielded **3a** (117 mg, 84%) as a colorless oil.

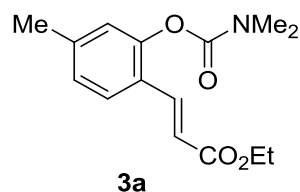

### (*E*)-Ethyl 3-{2-[(*N,N*-dimethylcarbamoyl)oxy]}-4-methylphenyl}acrylate (**3a**):

<sup>1</sup>H-NMR (300 MHz, CDCl<sub>3</sub>):  $\delta$  = 7.76 (d, *J* = 16.1 Hz, 1H), 7.46 (d, *J* = 8.0 Hz, 1H), 6.97 (d, *J* = 8.0 Hz, 1H), 6.94 (s, 1H), 6.34 (d, *J* = 16.1 Hz, 1H), 4.20 (q, *J* = 7.1 Hz, 2H), 3.11 (s, 3H), 2.97 (s, 3H), 2.30 (s, 3H), 1.27 (t, *J* = 7.1 Hz, 3H). <sup>13</sup>C-NMR (75 MHz, CDCl<sub>3</sub>):  $\delta$  = 166.8 (C<sub>q</sub>), 154.2 (C<sub>q</sub>), 149.9 (C<sub>q</sub>), 141.7 (C<sub>q</sub>), 138.1 (CH), 126.9 (CH), 126.5 (CH), 124.3 (C<sub>q</sub>), 123.7 (CH), 118.5 (CH), 60.2 (CH<sub>2</sub>), 36.6 (CH<sub>3</sub>), 36.3 (CH<sub>3</sub>), 21.2 (CH<sub>3</sub>), 14.1 (CH<sub>3</sub>). IR (ATR): 2934, 1708, 1632, 1381, 1149, 884, 619 cm<sup>-1</sup>. MS (EI) *m/z* (relative intensity) 277 (5) [M<sup>+</sup>], 189 (25), 132 (5), 72 (100). HR-MS (EI): *m/z* calcd for C<sub>15</sub>H<sub>19</sub>NO<sub>4</sub> 277.1314, found 277.1316. The analytical data are in accordance with those reported in the literature.<sup>2</sup>

## General Procedure B: Ruthenium-Catalyzed Oxidative Aerobic Alkenylation of Aryl Carbamates with Cocatalytic Amounts of Cu(OAc)<sub>2</sub>·H<sub>2</sub>O

A suspension of [1,1'-biphenyl]-3-yl *N,N*-dimethylcarbamate (**1w**) (121 mg, 0.50 mmol), ethyl acrylate (**2a**) (100 mg, 1.00 mmol), [RuCl<sub>2</sub>(*p*-cymene)]<sub>2</sub> (15.3 mg, 5.0 mol %), AgSbF<sub>6</sub> (34.4 mg, 20 mol %) and Cu(OAc)<sub>2</sub>·H<sub>2</sub>O (29.7 mg, 30 mol %) in DME (3.0 mL) was pre-stirred at ambient temperature for 10 min under N<sub>2</sub>. Thereafter, the reaction mixture was purged with air for 10 min. Then, the tube was sealed and the reaction mixture was stirred at 110 °C for 24 h under an atmosphere of ambient air. At ambient temperature, EtOAc (15 mL) was added and the mixture was filtered through silica. The solvents were removed *in vacuo*. Purification of the remaining residue by column chromatography (*n*-hexane/EtOAc: 10/1→5/1) yielded **3w** (116 mg, 68%) as a white solid (M.p.: 110–112 °C).

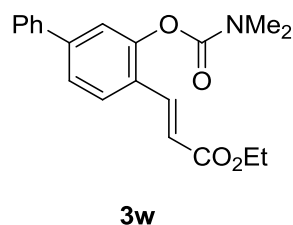

### (*E*)-Ethyl 3-{3-[(*N,N*-dimethylcarbamoyl)oxy]-[1,1'-biphenyl]-4-yl}acrylate (**3w**):

<sup>1</sup>H-NMR (300 MHz, CDCl<sub>3</sub>): δ = 7.85 (d, *J* = 16.0 Hz, 1H), 7.66 (d, *J* = 8.2 Hz, 1H), 7.60–7.56 (m, 2H), 7.47–7.37 (m, 4H), 7.36–7.30 (m, 1H), 6.46 (d, *J* = 16.0 Hz, 1H), 4.25 (q, *J* = 7.2 Hz, 2H), 3.18 (s, 3H), 3.03 (s, 3H), 1.32 (t, *J* = 7.2 Hz, 3H). <sup>13</sup>C-NMR (75 MHz, CDCl<sub>3</sub>): δ = 166.8 (C<sub>q</sub>), 154.2 (C<sub>q</sub>), 150.4 (C<sub>q</sub>), 144.0 (C<sub>q</sub>), 139.3 (C<sub>q</sub>), 137.9 (CH), 128.8 (CH), 128.0 (CH), 127.6 (CH), 127.0 (CH), 126.0 (C<sub>q</sub>), 124.3 (CH), 121.8

(CH), 119.4 (CH), 60.4 (CH<sub>2</sub>), 36.8 (CH<sub>3</sub>), 36.5 (CH<sub>3</sub>), 14.2 (CH<sub>3</sub>). IR (ATR): 2982, 1631, 1610, 1483, 1383, 1157, 893, 762 cm<sup>-1</sup>. MS (EI) *m/z* (relative intensity) 339 (5) [M<sup>+</sup>], 251 (20), 194 (8), 165 (10), 72 (100). HR-MS (EI): *m/z* calcd for C<sub>20</sub>H<sub>21</sub>NO<sub>4</sub> 339.1471, found 339.1470.

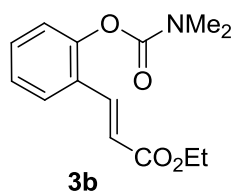

**(E)-Ethyl 3-{2-[(N,N-dimethylcarbamoyl)oxy]phenyl}acrylate (3b):** The general procedure A was followed using **1b** (83 mg, 0.50 mmol) and ethyl acrylate (**2a**) (100 mg, 1.00 mmol). Purification by column chromatography (*n*-hexane/EtOAc: 10/1→5/1) yielded **3b** (89 mg, 68%) as a colorless oil. <sup>1</sup>H-NMR (300 MHz, CDCl<sub>3</sub>): δ = 7.81 (d, *J* = 16.1 Hz, 1H), 7.58 (dd, *J* = 7.8, 1.7 Hz, 1H), 7.35 (dd, *J* = 7.8, 7.8 Hz, 1H), 7.21–7.12 (m, 2H), 6.41 (d, *J* = 16.1 Hz, 1H), 4.22 (q, *J* = 7.1 Hz, 2H), 3.14 (s, 3H), 2.99 (s, 3H), 1.29 (t, *J* = 7.1 Hz, 3H). <sup>13</sup>C-NMR (75 MHz, CDCl<sub>3</sub>): δ = 166.8 (C<sub>q</sub>), 154.2 (C<sub>q</sub>), 150.0 (C<sub>q</sub>), 138.2 (CH), 130.9 (CH), 127.2 (CH), 127.2 (C<sub>q</sub>), 125.6 (CH), 123.3 (CH), 119.7 (CH), 60.4 (CH<sub>2</sub>), 36.8 (CH<sub>3</sub>), 36.4 (CH<sub>3</sub>), 14.2 (CH<sub>3</sub>). IR (ATR): 2938, 1708, 1635, 1149, 1094, 754 cm<sup>-1</sup>. MS (EI) *m/z* (relative intensity) 263 (5) [M<sup>+</sup>], 175 (25), 118 (6), 72 (100). HR-MS (EI): *m/z* calcd for C<sub>14</sub>H<sub>17</sub>NO<sub>4</sub> 263.1158, found 263.1159. The analytical data are in accordance with those reported in the literature.<sup>2</sup>

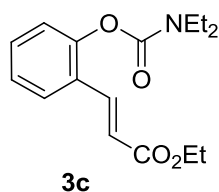

**(E)-Ethyl 3-{2-[(N,N-diethylcarbamoyl)oxy]phenyl}acrylate (3c):** The general procedure A was followed using **1c** (97 mg, 0.50 mmol) and ethyl acrylate (**2a**) (100 mg, 1.00 mmol). Purification by column chromatography (*n*-hexane/EtOAc: 10/1→5/1) yielded **3c** (98 mg, 67%) as a colorless oil. <sup>1</sup>H-NMR (300 MHz, CDCl<sub>3</sub>): δ =

7.82 (d,  $J = 16.1$  Hz, 1H), 7.60 (dd,  $J = 7.8, 1.7$  Hz, 1H), 7.35 (ddd,  $J = 7.8, 7.8, 1.7$  Hz, 1H), 7.21–7.13 (m, 2H), 6.40 (d,  $J = 16.1$  Hz, 1H), 4.22 (q,  $J = 7.1$  Hz, 2H), 3.49 (q,  $J = 7.1$  Hz, 2H), 3.37 (q,  $J = 7.1$  Hz, 2H), 1.33–1.25 (m, 6H), 1.19 (t,  $J = 7.1$  Hz, 3H).  $^{13}\text{C}$ -NMR (75 MHz,  $\text{CDCl}_3$ ):  $\delta = 167.7$  ( $\text{C}_q$ ), 153.5 ( $\text{C}_q$ ), 150.1 ( $\text{C}_q$ ), 138.2 (CH), 130.9 (CH), 127.3 ( $\text{C}_q$ ), 127.1 (CH), 125.5 (CH), 123.3 (CH), 119.6 (CH), 60.4 ( $\text{CH}_2$ ), 42.3 ( $\text{CH}_2$ ), 41.9 ( $\text{CH}_2$ ), 14.2 ( $\text{CH}_3$ ), 14.2 ( $\text{CH}_3$ ), 13.2 ( $\text{CH}_3$ ). IR (ATR): 2978, 1708, 1636, 1148, 1038, 881  $\text{cm}^{-1}$ . MS (EI)  $m/z$  (relative intensity) 291 (5) [ $\text{M}^+$ ], 175 (10), 118 (10), 100 (100), 72 (55), 44 (15). HR-MS (ESI):  $m/z$  calcd for  $\text{C}_{16}\text{H}_{21}\text{NO}_4 + \text{Na}^+$  314.1368, found 314.1367.

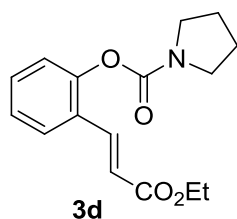

**(E)-2-(3-Ethoxy-3-oxoprop-1-en-1-yl)phenyl pyrrolidine-1-carboxylate (3d):** The general procedure A was followed using **1d** (96 mg, 0.50 mmol) and ethyl acrylate (**2a**) (100 mg, 1.00 mmol). Purification by column chromatography (*n*-hexane/EtOAc: 10/1→5/1) yielded **3d** (79 mg, 55%) as a colorless oil.  $^1\text{H}$ -NMR (300 MHz,  $\text{CDCl}_3$ ):  $\delta = 7.85$  (d,  $J = 16.1$  Hz, 1H), 7.58 (dd,  $J = 7.8, 1.7$  Hz, 1H), 7.34 (ddd,  $J = 7.8, 7.8, 1.7$  Hz, 1H), 7.21–7.13 (m, 2H), 6.40 (d,  $J = 16.1$  Hz, 1H), 4.22 (q,  $J = 7.1$  Hz, 2H), 3.61 (t,  $J = 6.7$  Hz, 2H), 3.46 (t,  $J = 6.7$  Hz, 2H), 2.01–1.83 (m, 4H), 1.29 (t,  $J = 7.1$  Hz, 3H).  $^{13}\text{C}$ -NMR (75 MHz,  $\text{CDCl}_3$ ):  $\delta = 166.8$  ( $\text{C}_q$ ), 152.3 ( $\text{C}_q$ ), 149.9 ( $\text{C}_q$ ), 138.4 (CH), 130.9 (CH), 127.1 ( $\text{C}_q$ ), 127.1 (CH), 125.4 (CH), 123.3 (CH), 119.5 (CH), 60.4 ( $\text{CH}_2$ ), 46.5

(CH<sub>2</sub>), 46.4 (CH<sub>2</sub>), 25.7 (CH<sub>2</sub>), 24.8 (CH<sub>2</sub>), 14.2 (CH<sub>3</sub>). IR (ATR): 2978, 1708, 1635, 1392, 1170, 757 cm<sup>-1</sup>. MS (EI) *m/z* (relative intensity) 289 (5) [M<sup>+</sup>], 175 (13), 118 (14), 98 (100), 55 (50), 43 (44). HR-MS (ESI): *m/z* calcd for C<sub>16</sub>H<sub>19</sub>NO<sub>4</sub>+Na<sup>+</sup> 312.1212, found 312.1207.

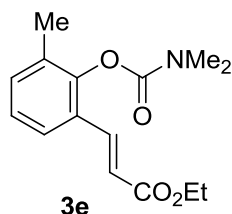

**(E)-Ethyl 3-{2-[(N,N-dimethylcarbamoyl)oxy]-3-methylphenyl}acrylate (3e):** The general procedure A was followed using **1e** (90 mg, 0.50 mmol) and ethyl acrylate (**2a**) (100 mg, 1.00 mmol). Purification by column chromatography (*n*-hexane/EtOAc: 10/1→5/1) yielded **3e** (97 mg, 70%) as a colorless oil. <sup>1</sup>H-NMR (300 MHz, CDCl<sub>3</sub>): δ = 7.75 (d, *J* = 16.1 Hz, 1H), 7.43 (d, *J* = 8.0 Hz, 1H), 7.21 (d, *J* = 7.6 Hz, 1H), 7.10 (dd, *J* = 7.6, 8.0 Hz, 1H), 6.38 (d, *J* = 16.1 Hz, 1H), 4.22 (q, *J* = 7.1 Hz, 2H), 3.17 (s, 3H), 3.00 (s, 3H), 2.18 (s, 3H), 1.29 (t, *J* = 7.1 Hz, 3H). <sup>13</sup>C-NMR (75 MHz, CDCl<sub>3</sub>): δ = 166.8 (C<sub>q</sub>), 153.7 (C<sub>q</sub>), 148.8 (C<sub>q</sub>), 138.6 (CH), 132.7 (CH), 131.9 (C<sub>q</sub>), 127.9 (C<sub>q</sub>), 125.7 (CH), 124.8 (CH), 119.7 (CH), 60.3 (CH<sub>2</sub>), 36.8 (CH<sub>3</sub>), 36.4 (CH<sub>3</sub>), 16.1 (CH<sub>3</sub>), 14.2 (CH<sub>3</sub>). IR (ATR): 2934, 1708, 1635, 1463, 1149, 1035, 847 cm<sup>-1</sup>. MS (EI) *m/z* (relative intensity) 277 (5) [M<sup>+</sup>], 189 (25), 160 (6), 131 (6), 72 (100). HR-MS (EI): *m/z* calcd for C<sub>15</sub>H<sub>19</sub>NO<sub>4</sub> 277.1314, found 277.1316. The analytical data are in accordance with those reported in the literature.<sup>2</sup>



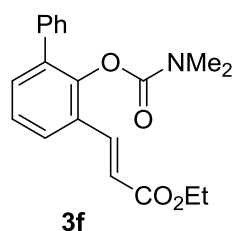

**(E)-Ethyl 3-{2-[(N,N-dimethylcarbamoyl)oxy]-[1,1'-biphenyl]-3-yl}acrylate (3f):**

The general procedure A was followed using **1f** (121 mg, 0.50 mmol) and ethyl acrylate (**2a**) (100 mg, 1.00 mmol). Purification by column chromatography (*n*-hexane/EtOAc: 10/1→5/1) yielded **3f** (130 mg, 77%) as a colorless oil. <sup>1</sup>H-NMR (300 MHz, CDCl<sub>3</sub>):  $\delta$  = 7.83 (d, *J* = 16.1 Hz, 1H), 7.61 (dd, *J* = 7.8, 1.9 Hz, 1H), 7.41–7.25 (m, 7H), 6.47 (d, *J* = 16.1 Hz, 1H), 4.24 (q, *J* = 7.1 Hz, 2H), 2.90 (s, 3H), 2.77 (s, 3H), 1.31 (t, *J* = 7.1 Hz, 3H). <sup>13</sup>C-NMR (75 MHz, CDCl<sub>3</sub>):  $\delta$  = 166.6 (C<sub>q</sub>), 153.6 (C<sub>q</sub>), 147.3 (C<sub>q</sub>), 138.5 (CH), 137.3 (C<sub>q</sub>), 136.4 (C<sub>q</sub>), 132.3 (CH), 128.8 (CH), 128.7 (C<sub>q</sub>), 127.9 (CH), 127.4 (CH), 126.3 (CH), 125.9 (CH), 120.0 (CH), 60.3 (CH<sub>2</sub>), 36.5 (CH<sub>3</sub>), 36.2 (CH<sub>3</sub>), 14.2 (CH<sub>3</sub>). IR (ATR): 2934, 1709, 1635, 1429, 1382, 1148, 841 cm<sup>-1</sup>. MS (EI) *m/z* (relative intensity) 339 (5) [M<sup>+</sup>], 251 (25), 194 (10), 165 (10), 72 (100). HR-MS (EI): *m/z* calcd for C<sub>20</sub>H<sub>21</sub>NO<sub>4</sub> 339.1471, found 339.1468. The analytical data are in accordance with those reported in the literature.<sup>2</sup>

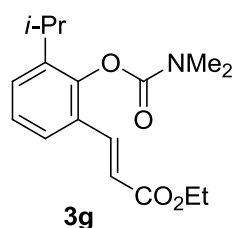

**(E)-Ethyl 3-{2-[(N,N-dimethylcarbamoyl)oxy]-3-isopropylphenyl}acrylate (3g):**

The general procedure A was followed using **1g** (104 mg, 0.50 mmol) and ethyl

acrylate (**2a**) (100 mg, 1.00 mmol). Purification by column chromatography (*n*-hexane/EtOAc: 10/1→5/1) yielded **3g** (119 mg, 79%) as a colorless oil. <sup>1</sup>H-NMR (300 MHz, CDCl<sub>3</sub>): δ = 7.73 (d, *J* = 16.0 Hz, 1H), 7.44 (dd, *J* = 7.7, 1.6 Hz, 1H), 7.31 (dd, *J* = 7.8, 1.6 Hz, 1H), 7.18 (dd, *J* = 7.8, 7.7 Hz, 1H), 6.38 (d, *J* = 16.0 Hz, 1H), 4.22 (q, *J* = 7.2 Hz, 2H), 3.09 (s, 3H), 3.07–2.95 (m, 1H), 3.01 (s, 3H), 1.30 (t, *J* = 7.2 Hz, 3H). 1.20 (d, *J* = 6.9 Hz, 6H). <sup>13</sup>C-NMR (75 MHz, CDCl<sub>3</sub>): δ = 167.2 (C<sub>q</sub>), 154.7 (C<sub>q</sub>), 148.0 (C<sub>q</sub>), 142.4 (C<sub>q</sub>), 139.4 (CH), 128.7 (CH), 128.6 (C<sub>q</sub>), 126.5 (CH), 125.1 (CH), 120.1 (CH), 60.8 (CH<sub>2</sub>), 37.3 (CH<sub>3</sub>), 36.9 (CH<sub>3</sub>), 27.8 (CH<sub>3</sub>), 23.4 (CH), 14.7 (CH<sub>3</sub>). IR (ATR): 2979, 1708, 1636, 1392, 1170, 1056, 911, 757 cm<sup>-1</sup>. MS (EI) *m/z* (relative intensity) 305 (5) [M<sup>+</sup>] 217 (15), 72 (100). HR-MS (ESI): *m/z* calcd for C<sub>17</sub>H<sub>23</sub>NO<sub>4</sub>+Na<sup>+</sup> 328.1525, found 328.1521.

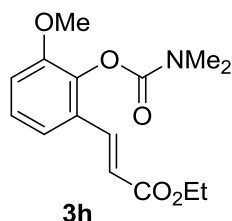

**(E)-Ethyl 3-{2-[(*N,N*-dimethylcarbamoyl)oxy]-3-methoxyphenyl}acrylate (**3h**):**

The general procedure A was followed using **1h** (98 mg, 0.50 mmol) and ethyl acrylate (**2a**) (100 mg, 1.00 mmol). Purification by column chromatography (*n*-hexane/EtOAc: 10/1→5/1) yielded **3h** (96 mg, 65%) as a white solid (M.p.: 99–101 °C). <sup>1</sup>H-NMR (300 MHz, CDCl<sub>3</sub>): δ = 7.78 (d, *J* = 16.1 Hz, 1H), 7.16 (dd, *J* = 8.0, 2.0 Hz, 1H), 7.11 (dd, *J* = 7.6, 8.0 Hz, 1H), 6.91 (dd, *J* = 7.6, 2.0 Hz, 1H), 6.40 (d, *J* = 16.1 Hz, 1H), 4.20 (q, *J* = 7.1 Hz, 2H), 3.77 (s, 3H), 3.12 (s, 3H), 2.97 (s, 3H), 1.27 (t, *J* = 7.1 Hz, 3H).

$^{13}\text{C}$ -NMR (75 MHz,  $\text{CDCl}_3$ ):  $\delta$  = 166.6 ( $\text{C}_\text{q}$ ), 153.9 ( $\text{C}_\text{q}$ ), 152.1 ( $\text{C}_\text{q}$ ), 139.5 ( $\text{C}_\text{q}$ ), 138.2 ( $\text{CH}$ ), 128.7 ( $\text{C}_\text{q}$ ), 125.9 ( $\text{CH}$ ), 120.0 ( $\text{CH}$ ), 118.5 ( $\text{CH}$ ), 113.4 ( $\text{CH}$ ), 60.3 ( $\text{CH}_2$ ), 56.0 ( $\text{CH}_3$ ), 36.7 ( $\text{CH}_3$ ), 36.5 ( $\text{CH}_3$ ), 14.1 ( $\text{CH}_3$ ). IR (ATR): 2984, 1715, 1634, 1580, 1181, 1059, 781  $\text{cm}^{-1}$ . MS (EI)  $m/z$  (relative intensity) 293 (5) [ $\text{M}^+$ ], 205 (12), 176 (5), 148 (5), 105 (5), 72 (100). HR-MS (EI):  $m/z$  calcd for  $\text{C}_{15}\text{H}_{19}\text{NO}_5$  293.1263, found 293.1253.

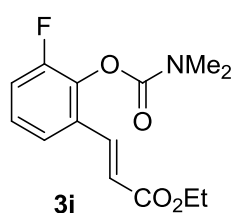

**(E)-ethyl 3-[2-(N,N-dimethylcarbamoyloxy)-3-fluorophenyl]acrylate (3i):** The general procedure A was followed using **1i** (92 mg, 0.50 mmol) and ethyl acrylate (**2a**) (100 mg, 1.00 mmol). Purification by column chromatography (*n*-hexane/EtOAc: 10/1→5/1) yielded **3i** (102 mg, 73%) as a colorless oil.  $^1\text{H}$ -NMR (300 MHz,  $\text{CDCl}_3$ ):  $\delta$  = 7.74 (d,  $J$  = 16.2 Hz, 1H), 7.37–7.32 (m, 1H), 7.17–7.10 (m, 2H), 6.42 (d,  $J$  = 16.2 Hz, 1H), 4.22 (q,  $J$  = 7.1 Hz, 2H), 3.14 (s, 3H), 3.00 (s, 3H), 1.29 (t,  $J$  = 7.1 Hz, 3H).  $^{13}\text{C}$ -NMR (75 MHz,  $\text{CDCl}_3$ ):  $\delta$  = 166.4 ( $\text{C}_\text{q}$ ), 155.1 (d,  $^1J_{\text{C-F}}$  = 250 Hz,  $\text{C}_\text{q}$ ), 153.1 ( $\text{C}_\text{q}$ ), 138.8 (d,  $^2J_{\text{C-F}}$  = 13 Hz,  $\text{C}_\text{q}$ ), 137.1 (d,  $^4J_{\text{C-F}}$  = 3 Hz, CH), 130.0 ( $\text{C}_\text{q}$ ), 126.2 (d,  $^3J_{\text{C-F}}$  = 8 Hz, CH), 122.4 (d,  $^4J_{\text{C-F}}$  = 3 Hz, CH), 121.0 (CH), 117.6 (d,  $^2J_{\text{C-F}}$  = 19 Hz, CH), 60.5 ( $\text{CH}_2$ ), 36.9 ( $\text{CH}_3$ ), 36.5 ( $\text{CH}_3$ ), 14.2 ( $\text{CH}_3$ ).  $^{19}\text{F}$ -NMR (282 MHz,  $\text{CDCl}_3$ ): -(128.1–128.2) (m). IR (ATR): 2938, 1709, 1639, 1584, 1259, 1145, 845  $\text{cm}^{-1}$ . MS (EI)

$m/z$  (relative intensity) 281 (5) [ $M^+$ ], 193 (18), 164 (5), 136 (5), 107 (5), 72 (100).

HR-MS (EI):  $m/z$  calcd for  $C_{14}H_{16}FNO_4$  281.1063, found 281.1060.

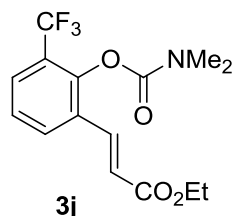

**(*E*)-Ethyl 3-{2-[(*N,N*-dimethylcarbamoyl)oxy]-3-[trifluoromethyl]phenyl}**

**acrylate (3j):** The general procedure A was followed using **1j** (117 mg, 0.50 mmol) and ethyl acrylate (**2a**) (100 mg, 1.00 mmol). Purification by column chromatography (*n*-hexane/EtOAc: 10/1→5/1) yielded **3j** (107 mg, 65%) as a colorless oil.  $^1\text{H-NMR}$  (300 MHz,  $\text{CDCl}_3$ ):  $\delta$  = 7.77 (d,  $J$  = 8.0 Hz, 1H), 7.67 (d,  $J$  = 16.0 Hz, 1H), 7.62 (d,  $J$  = 8.0 Hz, 1H), 7.29 (dd,  $J$  = 8.0, 8.0 Hz, 1H), 6.43 (d,  $J$  = 16.0 Hz, 1H), 4.22 (q,  $J$  = 7.2 Hz, 2H), 3.13 (s, 3H), 2.98 (s, 3H), 1.28 (t,  $J$  = 7.2 Hz, 3H).  $^{13}\text{C-NMR}$  (75 MHz,  $\text{CDCl}_3$ ):  $\delta$  = 166.2 ( $\text{C}_q$ ), 153.3 ( $\text{C}_q$ ), 147.6 (q,  $^4J_{\text{C-F}}$  = 2 Hz,  $\text{C}_q$ ), 136.8 (CH), 130.7 (CH), 130.7 ( $\text{C}_q$ ), 128.0 (q,  $^3J_{\text{C-F}}$  = 5 Hz, CH), 125.9 (CH), 124.5 (q,  $^2J_{\text{C-F}}$  = 31 Hz,  $\text{C}_q$ ), 122.8 (q,  $^1J_{\text{C-F}}$  = 272 Hz,  $\text{C}_q$ ), 121.4 (CH), 60.3 ( $\text{CH}_2$ ), 36.5 ( $\text{CH}_3$ ), 36.2 ( $\text{CH}_3$ ), 14.2 ( $\text{CH}_3$ ).  $^{19}\text{F-NMR}$  (282 MHz,  $\text{CDCl}_3$ ): -62.1 (s). IR (ATR): 2940, 1713, 1640, 1443, 1329, 1127, 1034, 979, 848  $\text{cm}^{-1}$ . MS (EI)  $m/z$  (relative intensity) 331 (5) [ $M^+$ ], 243 (20), 186 (5), 72 (100). HR-MS (ESI):  $m/z$  calcd for  $C_{15}H_{16}F_3NO_4+\text{Na}^+$  354.0929, found 354.0924.

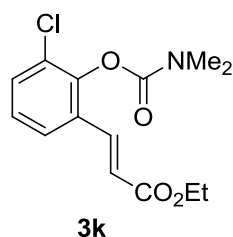

**(E)-Ethyl 3-{3-chloro-2-[(N,N-dimethylcarbamoyl)oxy]phenyl}acrylate (3k):** The general procedure A was followed using **1k** (100 mg, 0.50 mmol) and ethyl acrylate (**2a**) (100 mg, 1.00 mmol). Purification by column chromatography (*n*-hexane/EtOAc: 10/1→5/1) yielded **3k** (76 mg, 51%) as a colorless oil. <sup>1</sup>H-NMR (300 MHz, CDCl<sub>3</sub>):  $\delta$  = 7.72 (d, *J* = 16.1 Hz, 1H), 7.48 (dd, *J* = 8.0, 1.5 Hz, 1H), 7.40 (dd, *J* = 8.0, 1.5 Hz, 1H), 7.13 (dd, *J* = 8.0, 8.0 Hz, 1H), 6.41 (d, *J* = 16.1 Hz, 1H), 4.22 (q, *J* = 7.1 Hz, 2H), 3.17 (s, 3H), 3.00 (s, 3H), 1.29 (t, *J* = 7.1 Hz, 3H). <sup>13</sup>C-NMR (75 MHz, CDCl<sub>3</sub>):  $\delta$  = 166.4 (C<sub>q</sub>), 153.0 (C<sub>q</sub>), 146.4 (C<sub>q</sub>), 137.6 (CH), 131.3 (CH), 130.2 (C<sub>q</sub>), 128.7 (C<sub>q</sub>), 126.4 (CH), 125.6 (CH), 121.1 (CH), 60.5 (CH<sub>2</sub>), 36.9 (CH<sub>3</sub>), 36.5 (CH<sub>3</sub>), 14.2 (CH<sub>3</sub>). IR (ATR): 2938, 1709, 1637, 1567, 1438, 1148, 842 cm<sup>-1</sup>. MS (EI) *m/z* (relative intensity) 297 (5) [M<sup>+</sup>], 209 (12), 152 (8), 89 (8), 72 (100). HR-MS (EI): *m/z* calcd for C<sub>14</sub>H<sub>16</sub>ClNO<sub>4</sub> 297.0768, found 297.0761. The analytical data are in accordance with those reported in the literature.<sup>2</sup>

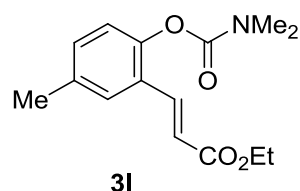

**(E)-Ethyl 3-{2-[(N,N-dimethylcarbamoyl)oxy]-5-methylphenyl}acrylate (3l):** The general procedure A was followed using **1l** (90 mg, 0.50 mmol) and ethyl acrylate (**2a**) (100 mg, 1.00 mmol). Purification by column chromatography (*n*-hexane/EtOAc:

10/1→5/1) yielded **3l** (77 mg, 56%) as a colorless oil.  $^1\text{H-NMR}$  (300 MHz,  $\text{CDCl}_3$ ):  $\delta$  = 7.77 (d,  $J$  = 16.1 Hz, 1H), 7.38 (d,  $J$  = 1.9 Hz, 1H), 7.15 (dd,  $J$  = 8.3, 1.9 Hz, 1H), 7.01 (d,  $J$  = 8.3 Hz, 1H), 6.39 (d,  $J$  = 16.1 Hz, 1H), 4.22 (q,  $J$  = 7.2 Hz, 2H), 3.13 (s, 3H), 2.99 (s, 3H), 2.30 (s, 3H), 1.29 (t,  $J$  = 7.2 Hz, 3H).  $^{13}\text{C-NMR}$  (75 MHz,  $\text{CDCl}_3$ ):  $\delta$  = 166.8 ( $\text{C}_\text{q}$ ), 154.4 ( $\text{C}_\text{q}$ ), 147.9 ( $\text{C}_\text{q}$ ), 138.4 (CH), 135.1 ( $\text{C}_\text{q}$ ), 131.7 (CH), 127.5 (CH), 126.8 ( $\text{C}_\text{q}$ ), 123.0 (CH), 119.4 (CH), 60.3 ( $\text{CH}_2$ ), 36.7 ( $\text{CH}_3$ ), 36.4 ( $\text{CH}_3$ ), 20.8 ( $\text{CH}_3$ ), 14.2 ( $\text{CH}_3$ ). IR (ATR): 2984, 1707, 1607, 1497, 1158, 1035, 1035, 978, 855  $\text{cm}^{-1}$ . MS (EI)  $m/z$  (relative intensity) 277 (3) [ $\text{M}^+$ ], 189 (25), 132 (6), 72 (100). HR-MS (EI):  $m/z$  calcd for  $\text{C}_{15}\text{H}_{19}\text{NO}_4$  277.1314, found 277.1316.

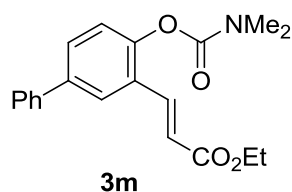

**(E)-Ethyl 3-{4-[(N,N-dimethylcarbamoyl)oxy]-[1,1'-biphenyl]-3-yl}acrylate (**3m**):**

The general procedure A was followed using **1m** (121 mg, 0.50 mmol) and ethyl acrylate (**2a**) (100 mg, 1.00 mmol). Purification by column chromatography ( $n$ -hexane/EtOAc: 10/1→5/1) yielded **3m** (100 mg, 59%) as a white solid (M.p.: 112–114 °C).  $^1\text{H-NMR}$  (300 MHz,  $\text{CDCl}_3$ ):  $\delta$  = 7.88 (d,  $J$  = 16.1 Hz, 1H), 7.79 (d,  $J$  = 2.2 Hz, 1H), 7.59–7.52 (m, 3H), 7.46–7.39 (m, 2H), 7.37–7.31 (m, 1H), 7.24 (d,  $J$  = 8.6 Hz, 1H), 6.51 (d,  $J$  = 16.1 Hz, 1H), 4.25 (q,  $J$  = 7.1 Hz, 2H), 3.17 (s, 3H), 3.03 (s, 3H), 1.32 (t,  $J$  = 7.1 Hz, 3H).  $^{13}\text{C-NMR}$  (75 MHz,  $\text{CDCl}_3$ ):  $\delta$  = 166.7 ( $\text{C}_\text{q}$ ), 154.2 ( $\text{C}_\text{q}$ ), 149.4 ( $\text{C}_\text{q}$ ), 139.8 ( $\text{C}_\text{q}$ ), 138.8 ( $\text{C}_\text{q}$ ), 138.2 (CH), 129.7 (CH), 128.7 (CH), 127.5 (CH), 127.4 ( $\text{C}_\text{q}$ ), 127.0 (CH), 125.8 (CH), 123.6 (CH), 120.0 (CH), 60.4 ( $\text{CH}_2$ ), 36.8 ( $\text{CH}_3$ ),

36.4 (CH<sub>3</sub>), 14.2 (CH<sub>3</sub>). IR (ATR): 2927, 1720, 1700, 1477, 1386, 1154, 996, 756, 693 cm<sup>-1</sup>. MS (EI) *m/z* (relative intensity) 339 (8) [M<sup>+</sup>], 251 (15), 194 (8), 165 (8), 72 (100). HR-MS (EI): *m/z* calcd for C<sub>20</sub>H<sub>21</sub>NO<sub>4</sub> 339.1471, found 339.1476.

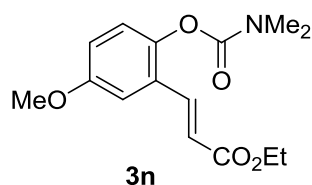

**(*E*)-Ethyl 3-{2-[(*N,N*-dimethylcarbamoyl)oxy]-5-methoxyphenyl}acrylate (3n):**

The general procedure A was followed using **1n** (98 mg, 0.50 mmol) and ethyl acrylate (**2a**) (100 mg, 1.00 mmol). Purification by column chromatography (*n*-hexane/EtOAc: 10/1→5/1) yielded **3n** (95 mg, 65%) as a white solid (M.p.: 52–54 °C). <sup>1</sup>H-NMR (300 MHz, CDCl<sub>3</sub>): δ = 7.75 (d, *J* = 16.1 Hz, 1H), 7.06 (d, *J* = 2.9 Hz, 1H), 7.05 (d, *J* = 8.9 Hz, 1H), 6.90 (dd, *J* = 8.9, 2.9 Hz, 1H), 6.38 (d, *J* = 16.1 Hz, 1H), 4.22 (q, *J* = 7.2 Hz, 2H), 3.79 (s, 3H), 3.14 (s, 3H), 2.99 (s, 3H), 1.30 (t, *J* = 7.2 Hz, 3H). <sup>13</sup>C-NMR (75 MHz, CDCl<sub>3</sub>): δ = 166.7 (C<sub>q</sub>), 156.9 (C<sub>q</sub>), 154.7 (C<sub>q</sub>), 143.9 (C<sub>q</sub>), 138.3 (CH), 127.9 (C<sub>q</sub>), 124.3 (CH), 119.9 (CH), 117.1 (CH), 111.1 (CH), 60.5 (CH<sub>2</sub>), 55.6 (CH<sub>3</sub>), 36.8 (CH<sub>3</sub>), 36.4 (CH<sub>3</sub>), 14.3 (CH<sub>3</sub>). IR (ATR): 2984, 1707, 1607, 1497, 1385, 1158, 1035, 855 cm<sup>-1</sup>. MS (EI) *m/z* (relative intensity) 293 (10) [M<sup>+</sup>], 205 (20), 176 (8), 72 (100). HR-MS (EI): *m/z* calcd for C<sub>15</sub>H<sub>19</sub>NO<sub>5</sub> 293.1263, found 293.1254.

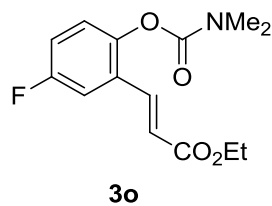

**(E)-Ethyl 3-{2-[(*N,N*-dimethylcarbamoyl)oxy]-5-fluorophenyl}acrylate (3o):** The general procedure A was followed using **1o** (90 mg, 0.50 mmol) and ethyl acrylate (**2a**) (100 mg, 1.00 mmol). Purification by column chromatography (*n*-hexane/EtOAc: 10/1→5/1) yielded **3o** (84 mg, 60 %) as a colorless oil. <sup>1</sup>H-NMR (300 MHz, CDCl<sub>3</sub>):  $\delta$  = 7.72 (dd, *J* = 16.1, 1.5 Hz, 1H), 7.25 (dd, *J* = 9.1, 2.9 Hz, 1H), 7.12–6.99 (m, 2H), 6.37 (d, *J* = 16.1 Hz, 1H), 4.22 (q, *J* = 7.2 Hz, 2H), 3.13 (s, 3H), 2.99 (s, 3H), 1.29 (t, *J* = 7.2 Hz, 3H). <sup>13</sup>C-NMR (75 MHz, CDCl<sub>3</sub>):  $\delta$  = 166.4 (C<sub>q</sub>), 159.7 (d, <sup>1</sup>*J*<sub>C-F</sub> = 248 Hz, C<sub>q</sub>), 154.1 (C<sub>q</sub>), 145.9 (d, <sup>4</sup>*J*<sub>C-F</sub> = 3 Hz, C<sub>q</sub>), 137.1 (d, <sup>4</sup>*J*<sub>C-F</sub> = 2 Hz, CH), 128.8 (d, <sup>3</sup>*J*<sub>C-F</sub> = 9 Hz, C<sub>q</sub>), 124.8 (d, <sup>3</sup>*J*<sub>C-F</sub> = 9 Hz, CH), 120.9 (CH), 117.6 (d, <sup>2</sup>*J*<sub>C-F</sub> = 25 Hz, CH), 113.0 (d, <sup>2</sup>*J*<sub>C-F</sub> = 25 Hz, CH), 60.6 (CH<sub>2</sub>), 36.8 (CH<sub>3</sub>), 36.4 (CH<sub>3</sub>), 14.2 (CH<sub>3</sub>). <sup>19</sup>F-NMR (282 MHz, CDCl<sub>3</sub>): -(116.6–116.7) (m). IR (ATR): 2938, 1709, 1637, 1483, 1385, 1145, 1033, 865, 751 cm<sup>-1</sup>. MS (EI) *m/z* (relative intensity) 281 (5) [*M*<sup>+</sup>], 193 (8), 164 (5), 136 (5), 107 (5), 72 (100). HR-MS (EI): *m/z* calcd for C<sub>14</sub>H<sub>16</sub>FNO<sub>4</sub> 281.1063, found 281.1073.

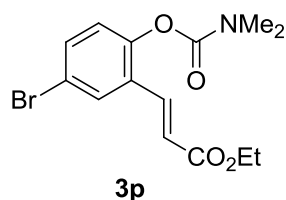

**(E)-Ethyl 3-{5-bromo-2-[(*N,N*-dimethylcarbamoyl)oxy]phenyl}acrylate (3p):** The general procedure A was followed using **1p** (122 mg, 0.50 mmol) and ethyl acrylate (**2a**)



(100 mg, 1.00 mmol). Purification by column chromatography (*n*-hexane/EtOAc: 10/1→5/1) yielded **3p** (103 mg, 61%) as a white solid (M.p.: 107–109 °C). <sup>1</sup>H-NMR (300 MHz, CDCl<sub>3</sub>): δ = 7.69 (d, *J* = 16.1 Hz, 1H), 7.69 (d, *J* = 2.4 Hz, 1H), 7.42 (dd, *J* = 8.7, 2.4 Hz, 1H), 7.03 (d, *J* = 8.7 Hz, 1H), 6.38 (d, *J* = 16.1 Hz, 1H), 4.21 (q, *J* = 7.2 Hz, 2H), 3.11 (s, 3H), 2.97 (s, 3H), 1.28 (t, *J* = 7.2 Hz, 3H). <sup>13</sup>C-NMR (75 MHz, CDCl<sub>3</sub>): δ = 166.3 (C<sub>q</sub>), 153.7 (C<sub>q</sub>), 148.9 (C<sub>q</sub>), 136.7 (CH), 133.5 (CH), 129.8 (CH), 129.2 (C<sub>q</sub>), 125.0 (CH), 120.9 (CH), 118.6 (C<sub>q</sub>), 60.6 (CH<sub>2</sub>), 36.8 (CH<sub>3</sub>), 36.4 (CH<sub>3</sub>), 14.2 (CH<sub>3</sub>). IR (ATR): 2932, 1699, 1474, 1384, 1215, 1107, 973, 855 cm<sup>-1</sup>. MS (EI) *m/z* (relative intensity) 341 (5) [M<sup>+</sup>], 253 (15), 196 (5), 89 (6), 72 (100). HR-MS (EI): *m/z* calcd for C<sub>14</sub>H<sub>16</sub>BrNO<sub>4</sub> 341.0263, found 341.0265.

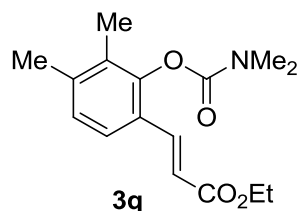

**(*E*)-Ethyl 3-{2-[(*N,N*-dimethylcarbamoyl)oxy]-3,4-dimethylphenyl}acrylate (**3q**):**

The general procedure A was followed using **1q** (97 mg, 0.50 mmol) and ethyl acrylate (**2a**) (100 mg, 1.00 mmol). Purification by column chromatography (*n*-hexane/EtOAc: 10/1→5/1) yielded **3q** (114 mg, 78%) as a white solid (M.p.: 63–65 °C). <sup>1</sup>H-NMR (300 MHz, CDCl<sub>3</sub>): δ = 7.72 (d, *J* = 16.1 Hz, 1H), 7.35 (d, *J* = 7.8 Hz, 1H), 7.00 (d, *J* = 7.8 Hz, 1H), 6.35 (d, *J* = 16.1 Hz, 1H), 4.21 (q, *J* = 7.2 Hz, 2H), 3.18 (s, 3H), 3.00 (s, 3H), 2.26 (s, 3H), 2.06 (s, 3H), 1.29 (t, *J* = 7.2 Hz, 3H). <sup>13</sup>C-NMR (75 MHz, CDCl<sub>3</sub>): δ = 166.9 (C<sub>q</sub>), 154.0 (C<sub>q</sub>), 148.5 (C<sub>q</sub>), 140.7 (C<sub>q</sub>), 138.9 (CH), 130.3 (C<sub>q</sub>), 127.3 (CH),

125.4 (C<sub>q</sub>), 123.9 (CH), 118.5 (CH), 60.2 (CH<sub>2</sub>), 36.8 (CH<sub>3</sub>), 36.4 (CH<sub>3</sub>), 20.2 (CH<sub>3</sub>), 14.2 (CH<sub>3</sub>), 12.4 (CH<sub>3</sub>). IR (ATR): 2926, 1704, 1631, 1453, 1313, 1156, 978, 862 cm<sup>-1</sup>. MS (EI) *m/z* (relative intensity) 291 (5) [M<sup>+</sup>], 203 (15), 174 (5), 72 (100). HR-MS (EI): *m/z* calcd for C<sub>16</sub>H<sub>21</sub>NO<sub>4</sub> 291.1471, found 291.1472.

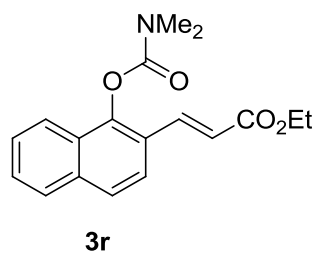

**(E)-Ethyl 3-{1-[(N,N-dimethylcarbamoyl)oxy]naphthalen-2-yl}acrylate (3r):** The general procedure A was followed using [RuCl<sub>2</sub>(*p*-cymene)]<sub>2</sub> (15.3 mg, 5.0 mol %), AgSbF<sub>6</sub> (34.4 mg, 20 mol %), **1r** (108 mg, 0.50 mmol) and ethyl acrylate (**2a**) (100 mg, 1.00 mmol). Purification by column chromatography (*n*-hexane/EtOAc: 10/1→5/1) yielded **3r** (119 mg, 76%) as a white solid (M.p.: 86–88 °C). <sup>1</sup>H-NMR (300 MHz, CDCl<sub>3</sub>): δ = 7.98 (d, *J* = 16.1 Hz, 1H), 7.89–7.80 (m, 2H), 7.74–7.66 (m, 2H), 7.56–7.48 (m, 2H), 6.54 (d, *J* = 16.1 Hz, 1H), 4.28 (q, *J* = 7.2 Hz, 2H), 3.35 (s, 3H), 3.09 (s, 3H), 1.35 (t, *J* = 7.2 Hz, 3H). <sup>13</sup>C-NMR (75 MHz, CDCl<sub>3</sub>): δ = 166.9 (C<sub>q</sub>), 154.3 (C<sub>q</sub>), 146.7 (C<sub>q</sub>), 138.1 (CH), 135.3 (C<sub>q</sub>), 128.0 (CH), 127.4 (CH), 127.1 (CH), 126.1 (CH), 124.0 (C<sub>q</sub>), 124.0 (C<sub>q</sub>), 122.8 (CH), 122.2 (CH), 119.9 (CH), 60.5 (CH<sub>2</sub>), 37.0 (CH<sub>3</sub>), 36.7 (CH<sub>3</sub>), 14.3 (CH<sub>3</sub>). IR (ATR): 2962, 1712, 1631, 1441, 1393, 1294, 1032, 872, 751 cm<sup>-1</sup>. MS (EI) *m/z* (relative intensity) 313 (5) [M<sup>+</sup>], 225 (12), 196 (8), 168 (10), 139 (10), 72 (100). HR-MS (EI): *m/z* calcd for C<sub>18</sub>H<sub>19</sub>NO<sub>4</sub> 313.1314, found 313.1317. The analytical data are in accordance with those reported in the literature.<sup>2</sup>

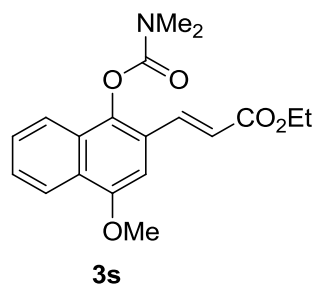

**(E)-Ethyl 3-{1-[(N,N-dimethylcarbamoyl)oxy]-4-methoxynaphthalen-2-yl}**

**acrylate (3s):** The general procedure A was followed using  $[\text{RuCl}_2(p\text{-cymene})]_2$  (15.3 mg, 5.0 mol %),  $\text{AgSbF}_6$  (34.4 mg, 20 mol %), **1s** (123 mg, 0.50 mmol) and ethyl acrylate (**2a**) (100 mg, 1.00 mmol). Purification by column chromatography (*n*-hexane/EtOAc: 10/1→5/1) yielded **3s** (116 mg, 68%) as a yellow solid (M.p.: 131–133 °C).  $^1\text{H-NMR}$  (300 MHz,  $\text{CDCl}_3$ ):  $\delta$  = 8.23–8.18 (m, 1H), 7.95 (d,  $J$  = 16.0 Hz, 1H), 7.80–7.75 (m, 1H), 7.55–7.45 (m, 2H), 6.89 (s, 1H), 6.49 (d,  $J$  = 16.0 Hz, 1H), 4.27 (q,  $J$  = 7.2 Hz, 2H), 3.98 (s, 3H), 3.31 (s, 3H), 3.06 (s, 3H), 1.34 (t,  $J$  = 7.2 Hz, 3H).  $^{13}\text{C-NMR}$  (75 MHz,  $\text{CDCl}_3$ ):  $\delta$  = 166.8 ( $\text{C}_q$ ), 154.6 ( $\text{C}_q$ ), 153.2 ( $\text{C}_q$ ), 140.7 ( $\text{C}_q$ ), 138.4 (CH), 128.5 ( $\text{C}_q$ ), 127.5 (CH), 127.5 ( $\text{C}_q$ ), 126.8 (CH), 123.5 ( $\text{C}_q$ ), 122.4 (CH), 122.0 (CH), 119.3 (CH), 99.5 (CH), 60.5 ( $\text{CH}_2$ ), 55.5 ( $\text{CH}_3$ ), 37.0 ( $\text{CH}_3$ ), 36.7 ( $\text{CH}_3$ ), 14.3 ( $\text{CH}_3$ ). IR (ATR): 2937, 1717, 1702, 1633, 1511, 1446, 1288, 1088, 820  $\text{cm}^{-1}$ . MS (EI)  $m/z$  (relative intensity) 343 (10) [ $\text{M}^+$ ], 255 (5), 226 (8), 198 (5), 183 (10), 72 (100). HR-MS (EI):  $m/z$  calcd for  $\text{C}_{19}\text{H}_{21}\text{NO}_5$  343.1420, found 343.1415.

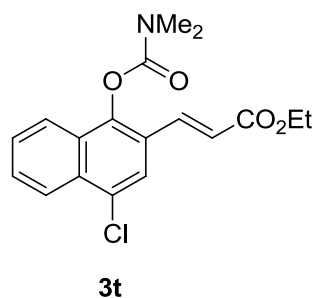

**(E)-Ethyl 3-[4-chloro-1-[(N,N-dimethylcarbamoyl)oxy]naphthalen-2-yl]acrylate**

**(3t):** The general procedure A was followed using  $[\text{RuCl}_2(p\text{-cymene})]_2$  (15.3 mg, 5.0 mol %),  $\text{AgSbF}_6$  (34.4 mg, 20 mol %), **1t** (123 mg, 0.50 mmol) and ethyl acrylate (**2a**) (100 mg, 1.00 mmol). Purification by column chromatography (*n*-hexane/EtOAc: 10/1→5/1) yielded **3t** (128 mg, 74%) as a yellow solid (M.p.: 127–129 °C).  $^1\text{H}$ -NMR (300 MHz,  $\text{CDCl}_3$ ):  $\delta$  = 8.21 (d,  $J$  = 8.6 Hz, 1H), 7.87 (d,  $J$  = 16.0 Hz, 1H), 7.88–7.84 (m, 1H), 7.77 (s, 1H), 7.65–7.54 (m, 2H), 6.50 (d,  $J$  = 16.0 Hz, 1H), 4.26 (q,  $J$  = 7.2 Hz, 2H), 3.33 (s, 3H), 3.06 (s, 3H), 1.33 (t,  $J$  = 7.2 Hz, 3H).  $^{13}\text{C}$ -NMR (75 MHz,  $\text{CDCl}_3$ ):  $\delta$  = 166.6 ( $\text{C}_q$ ), 154.1 ( $\text{C}_q$ ), 145.6 ( $\text{C}_q$ ), 136.9 (CH), 132.2 ( $\text{C}_q$ ), 129.9 ( $\text{C}_q$ ), 129.0 ( $\text{C}_q$ ), 128.4 (CH), 127.8 (CH), 125.0 (CH), 124.4 ( $\text{C}_q$ ), 122.9 (CH), 122.7 (CH), 120.7 (CH), 60.6 ( $\text{CH}_2$ ), 37.0 ( $\text{CH}_3$ ), 36.7 ( $\text{CH}_3$ ), 14.3 ( $\text{CH}_3$ ). IR (ATR): 2976, 1728, 1704, 1593, 1453, 1393, 1255, 1088, 754  $\text{cm}^{-1}$ . MS (EI)  $m/z$  (relative intensity) 347 (5) [ $\text{M}^+$ ], 259 (5), 230 (5), 202 (8), 139 (10), 72 (100). HR-MS (EI):  $m/z$  calcd for  $\text{C}_{18}\text{H}_{18}\text{ClNO}_4$  347.0924, found 347.0920.

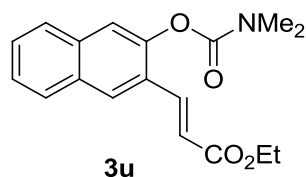

**(E)-Ethyl 3-{3-[(N,N-dimethylcarbamoyl)oxy]naphthalen-2-yl}acrylate (**3u**):** The general procedure A was followed using  $[\text{RuCl}_2(p\text{-cymene})]_2$  (15.3 mg, 5.0 mol %),  $\text{AgSbF}_6$  (34.4 mg, 20 mol %), **1u** (108 mg, 0.50 mmol) and ethyl acrylate (**2a**) (100 mg, 1.00 mmol). Purification by column chromatography (*n*-hexane/EtOAc: 10/1→5/1) yielded **3u** (137 mg, 87%) as a white solid (M.p.: 82–84 °C).  $^1\text{H}$ -NMR (300 MHz,  $\text{CDCl}_3$ ):  $\delta$  = 8.07 (s, 1H), 7.92 (d,  $J$  = 16.1 Hz, 1H), 7.80 (d,  $J$  = 8.0 Hz, 1H), 7.73 (d,  $J$  = 7.5 Hz, 1H), 7.60 (s, 1H), 7.49–7.38 (m, 2H), 6.57 (d,  $J$  = 16.1 Hz, 1H), 4.26 (q,  $J$  = 7.2 Hz, 2H), 3.19 (s, 3H), 3.03 (s, 3H), 1.32 (t,  $J$  = 7.2 Hz, 3H).  $^{13}\text{C}$ -NMR (75 MHz,  $\text{CDCl}_3$ ):  $\delta$  = 166.7 ( $\text{C}_\text{q}$ ), 154.4 ( $\text{C}_\text{q}$ ), 147.2 ( $\text{C}_\text{q}$ ), 138.9 (CH), 134.4 ( $\text{C}_\text{q}$ ), 130.9 ( $\text{C}_\text{q}$ ), 128.1 (CH), 128.0 (CH), 127.4 (CH), 127.3 (CH), 127.0 ( $\text{C}_\text{q}$ ), 126.0 (CH), 120.2 (CH), 120.2 (CH), 60.4 ( $\text{CH}_2$ ), 36.8 ( $\text{CH}_3$ ), 36.5 ( $\text{CH}_3$ ), 14.2 ( $\text{CH}_3$ ). IR (ATR): 2987, 1711, 1638, 1440, 1270, 1157, 979, 860, 734  $\text{cm}^{-1}$ . MS (EI)  $m/z$  (relative intensity) 313 (10) [ $\text{M}^+$ ], 225 (20), 196 (8), 168 (10), 139 (10), 72 (100). HR-MS (EI):  $m/z$  calcd for  $\text{C}_{18}\text{H}_{19}\text{NO}_4$  313.1314, found 313.1318. The analytical data are in accordance with those reported in the literature.<sup>2</sup>

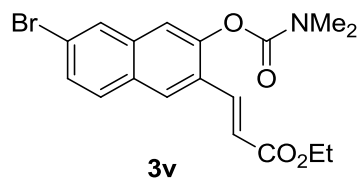

**(E)-Ethyl 3-{6-bromo-3-[(N,N-dimethylcarbamoyl)oxy]naphthalen-2-yl}acrylate**

**(3v):** The general procedure A was followed using  $[\text{RuCl}_2(p\text{-cymene})]_2$  (15.3 mg, 5.0 mol %),  $\text{AgSbF}_6$  (34.4 mg, 20 mol %), **1v** (147 mg, 0.50 mmol) and ethyl acrylate (**2a**) (100 mg, 1.00 mmol). Purification by column chromatography (*n*-hexane/EtOAc: 10/1→5/1) yielded **3v** (143 mg, 73%) as a white solid (M.p.: 120–122 °C).  $^1\text{H}$ -NMR (300 MHz,  $\text{CDCl}_3$ ):  $\delta$  = 7.92 (s, 1H), 7.92 (s, 1H), 7.86 (d,  $J$  = 16.0 Hz, 1H), 7.59–7.53 (m, 2H), 7.49 (d,  $J$  = 8.7 Hz, 1H), 6.52 (d,  $J$  = 16.0 Hz, 1H), 4.25 (q,  $J$  = 7.2 Hz, 2H), 3.18 (s, 3H), 3.03 (s, 3H), 1.32 (t,  $J$  = 7.2 Hz, 3H).  $^{13}\text{C}$ -NMR (75 MHz,  $\text{CDCl}_3$ ):  $\delta$  = 166.5 ( $\text{C}_\text{q}$ ), 154.1 ( $\text{C}_\text{q}$ ), 147.5 ( $\text{C}_\text{q}$ ), 138.3 (CH), 132.7 ( $\text{C}_\text{q}$ ), 131.9 ( $\text{C}_\text{q}$ ), 130.6 (CH), 130.0 (CH), 128.9 (CH), 128.0 ( $\text{C}_\text{q}$ ), 126.8 (CH), 121.0 (CH), 120.2 (CH), 119.8 ( $\text{C}_\text{q}$ ), 60.5 ( $\text{CH}_2$ ), 36.9 ( $\text{CH}_3$ ), 36.5 ( $\text{CH}_3$ ), 14.2 ( $\text{CH}_3$ ). IR (ATR): 2927, 1730, 1633, 1481, 1362, 1161, 1052, 884  $\text{cm}^{-1}$ . MS (EI)  $m/z$  (relative intensity) 391 (5) [ $\text{M}^+$ ], 303 (10), 276 (5), 248 (8), 139 (13), 72 (100). HR-MS (EI):  $m/z$  calcd for  $\text{C}_{18}\text{H}_{18}\text{BrNO}_4$  391.0419, found 391.0411. The analytical data are in accordance with those reported in the literature.<sup>2</sup>

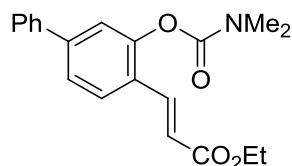

**3w**

**(E)-Ethyl 3-{3-[(N,N-dimethylcarbamoyl)oxy]-[1,1'-biphenyl]-4-yl}acrylate (3w):**

The general procedure A was followed using **1w** (121 mg, 0.50 mmol) and ethyl acrylate (**2a**) (100 mg, 1.00 mmol). Purification by column chromatography (*n*-hexane/EtOAc: 10/1→5/1) yielded **3w** (165 mg, 97%) as a white solid (M.p.: 110–112 °C). <sup>1</sup>H-NMR (300 MHz, CDCl<sub>3</sub>): δ = 7.85 (d, *J* = 16.0 Hz, 1H), 7.66 (d, *J* = 8.2 Hz, 1H), 7.60–7.56 (m, 2H), 7.47–7.37 (m, 4H), 7.36–7.30 (m, 1H), 6.46 (d, *J* = 16.0 Hz, 1H), 4.25 (q, *J* = 7.2 Hz, 2H), 3.18 (s, 3H), 3.03 (s, 3H), 1.32 (t, *J* = 7.2 Hz, 3H). <sup>13</sup>C-NMR (75 MHz, CDCl<sub>3</sub>): δ = 166.8 (C<sub>q</sub>), 154.2 (C<sub>q</sub>), 150.4 (C<sub>q</sub>), 144.0 (C<sub>q</sub>), 139.3 (C<sub>q</sub>), 137.9 (CH), 128.8 (CH), 128.0 (CH), 127.6 (CH), 127.0 (CH), 126.0 (C<sub>q</sub>), 124.3 (CH), 121.8 (CH), 119.4 (CH), 60.4 (CH<sub>2</sub>), 36.8 (CH<sub>3</sub>), 36.5 (CH<sub>3</sub>), 14.2 (CH<sub>3</sub>). IR (ATR): 2982, 1631, 1610, 1483, 1383, 1157, 893, 762 cm<sup>-1</sup>. MS (EI) *m/z* (relative intensity) 339 (5) [M<sup>+</sup>], 251 (20), 194 (8), 165 (10), 72 (100). HR-MS (EI): *m/z* calcd for C<sub>20</sub>H<sub>21</sub>NO<sub>4</sub> 339.1471, found 339.1470.

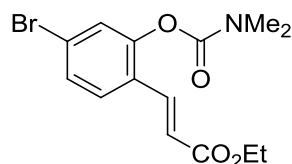

**3x**

**(E)-Ethyl 3-{4-bromo-2-[(N,N-dimethylcarbamoyl)oxy]phenyl}acrylate (3x):** The general procedure A was followed using **1x** (122 mg, 0.50 mmol) and ethyl acrylate (**2a**) (100 mg, 1.00 mmol). Purification by column chromatography (*n*-hexane/EtOAc:

10/1→5/1) yielded **3x** (101 mg, 60%) as a white solid (M.p.: 68–70 °C). <sup>1</sup>H-NMR (300 MHz, CDCl<sub>3</sub>): δ = 7.71 (d, *J* = 16.1 Hz, 1H), 7.43 (d, *J* = 8.4 Hz, 1H), 7.35–7.28 (m, 2H), 6.38 (d, *J* = 16.1 Hz, 1H), 4.20 (q, *J* = 7.2 Hz, 2H), 3.11 (s, 3H), 2.98 (s, 3H), 1.28 (t, *J* = 7.2 Hz, 3H). <sup>13</sup>C-NMR (75 MHz, CDCl<sub>3</sub>): δ = 166.5 (C<sub>q</sub>), 153.6 (C<sub>q</sub>), 150.2 (C<sub>q</sub>), 137.1 (CH), 128.9 (CH), 128.1 (CH), 126.7 (CH), 126.3 (C<sub>q</sub>), 123.9 (C<sub>q</sub>), 120.1 (CH), 60.5 (CH<sub>2</sub>), 36.8 (CH<sub>3</sub>), 36.4 (CH<sub>3</sub>), 14.2 (CH<sub>3</sub>). IR (ATR): 2939, 1713, 1636, 1590, 1370, 1146, 1032, 889, 815 cm<sup>-1</sup>. MS (EI) *m/z* (relative intensity) 341 (5) [M<sup>+</sup>], 253 (15), 196 (5), 89 (8), 72 (100). HR-MS (EI): *m/z* calcd for C<sub>14</sub>H<sub>16</sub>BrNO<sub>4</sub> 341.0263, found 341.0278.

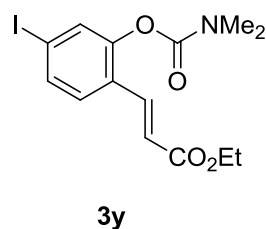

**(E)-Ethyl 3-{2-[(*N,N*-dimethylcarbamoyl)oxy]-4-iodophenyl}acrylate (**3y**):** The general procedure A was followed using **1y** (146 mg, 0.50 mmol) and ethyl acrylate (**2a**) (100 mg, 1.00 mmol). Purification by column chromatography (*n*-hexane/EtOAc: 10/1→5/1) yielded **3y** (104 mg, 51%) as a yellow solid (M.p.: 84–86 °C). <sup>1</sup>H-NMR (300 MHz, CDCl<sub>3</sub>): δ = 7.70 (d, *J* = 16.1 Hz, 1H), 7.53–7.49 (m, 2H), 7.28 (d, *J* = 8.9 Hz, 1H), 6.40 (d, *J* = 16.1 Hz, 1H), 4.21 (q, *J* = 7.2 Hz, 2H), 3.11 (s, 3H), 2.99 (s, 3H), 1.29 (t, *J* = 7.2 Hz, 3H). <sup>13</sup>C-NMR (75 MHz, CDCl<sub>3</sub>): δ = 166.5 (C<sub>q</sub>), 153.7 (C<sub>q</sub>), 149.9 (C<sub>q</sub>), 137.3 (CH), 134.8 (CH), 132.5 (CH), 128.2 (CH), 127.0 (C<sub>q</sub>), 120.2 (CH), 95.5 (C<sub>q</sub>), 60.5 (CH<sub>2</sub>), 36.8 (CH<sub>3</sub>), 36.5 (CH<sub>3</sub>), 14.2 (CH<sub>3</sub>). IR (ATR): 2938, 1707,



1636, 1477, 1370, 1147, 1032, 868  $\text{cm}^{-1}$ . MS (EI)  $m/z$  (relative intensity) 389 (5) [ $\text{M}^+$ ], 301 (20), 243 (5), 72 (100). HR-MS (EI):  $m/z$  calcd for  $\text{C}_{14}\text{H}_{16}\text{INO}_4$  389.0124, found 389.0117.

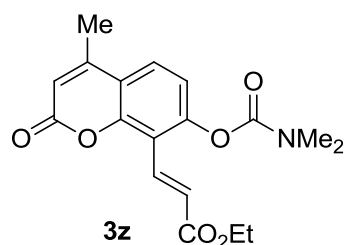

**(E)-Ethyl 3-{7-[(N,N-dimethylcarbamoyl)oxy]-4-methyl-2-oxo-2H-chromen-8-yl}**

**acrylate (3z):** The general procedure A was followed using  $[\text{RuCl}_2(p\text{-cymene})]_2$  (15.3 mg, 5.0 mol %),  $\text{AgSbF}_6$  (34.4 mg, 20 mol %), **1z** (117 mg, 0.50 mmol) and ethyl acrylate (**2a**) (100 mg, 1.00 mmol). Purification by column chromatography (*n*-hexane/EtOAc: 10/1→5/1) yielded **3z** (96 mg, 56%) as a yellow solid (M.p.: 201–203 °C).  $^1\text{H}$ -NMR (300 MHz,  $\text{CDCl}_3$ ):  $\delta$  = 7.88 (d,  $J$  = 16.5 Hz, 1H), 7.58 (d,  $J$  = 8.9 Hz, 1H), 7.16 (d,  $J$  = 8.9 Hz, 1H), 6.95 (d,  $J$  = 16.5 Hz, 1H), 6.27 (d,  $J$  = 1.2 Hz, 1H), 4.25 (q,  $J$  = 7.2 Hz, 2H), 3.17 (s, 3H), 3.02 (s, 3H), 2.42 (d,  $J$  = 1.2 Hz, 3H), 1.32 (t,  $J$  = 7.2 Hz, 3H).  $^{13}\text{C}$ -NMR (75 MHz,  $\text{CDCl}_3$ ):  $\delta$  = 167.3 ( $\text{C}_q$ ), 159.7 ( $\text{C}_q$ ), 153.4 ( $\text{C}_q$ ), 152.7 ( $\text{C}_q$ ), 152.6 ( $\text{C}_q$ ), 152.2 ( $\text{C}_q$ ), 132.2 (CH), 125.5 (CH), 125.5 (CH), 119.3 (CH), 117.6 ( $\text{C}_q$ ), 116.6 ( $\text{C}_q$ ), 114.3 (CH), 60.7 ( $\text{CH}_2$ ), 37.0 ( $\text{CH}_3$ ), 36.6 ( $\text{CH}_3$ ), 19.0 ( $\text{CH}_3$ ), 14.3 ( $\text{CH}_3$ ). IR (ATR): 2980, 1726, 1703, 1629, 1382, 1296, 1152, 1032, 869  $\text{cm}^{-1}$ . MS (EI)  $m/z$  (relative intensity) 345 (5) [ $\text{M}^+$ ], 257 (10), 228 (5), 172 (5), 72 (100), 43 (7). HR-MS (EI):  $m/z$  calcd for  $\text{C}_{18}\text{H}_{19}\text{NO}_6$  345.1212, found 345.1208.

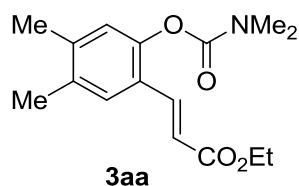

**(E)-Ethyl 3-{2-[(N,N-dimethylcarbamoyl)oxy]-4,5-dimethylphenyl}acrylate (3aa):**

The general procedure A was followed using **1aa** (97 mg, 0.50 mmol) and ethyl acrylate (**2a**) (100 mg, 1.00 mmol). Purification by column chromatography (*n*-hexane/EtOAc: 10/1→5/1) yielded **3aa** (126 mg, 87%) as a white solid (M.p.: 86–88 °C). <sup>1</sup>H-NMR (300 MHz, CDCl<sub>3</sub>): δ = 7.75 (d, *J* = 16.1 Hz, 1H), 7.35 (s, 1H), 6.91 (s, 1H), 6.36 (d, *J* = 16.1 Hz, 1H), 4.22 (q, *J* = 7.2 Hz, 2H), 3.14 (s, 3H), 3.00 (s, 3H), 2.23 (s, 3H), 2.22 (s, 3H), 1.30 (t, *J* = 7.2 Hz, 3H). <sup>13</sup>C-NMR (75 MHz, CDCl<sub>3</sub>): δ = 167.1 (C<sub>q</sub>), 154.6 (C<sub>q</sub>), 148.1 (C<sub>q</sub>), 140.5 (C<sub>q</sub>), 138.4 (CH), 134.1 (C<sub>q</sub>), 128.0 (CH), 124.4 (C<sub>q</sub>), 124.2 (CH), 118.4 (CH), 60.3 (CH<sub>2</sub>), 36.8 (CH<sub>3</sub>), 36.5 (CH<sub>3</sub>), 19.9 (CH<sub>3</sub>), 19.2 (CH<sub>3</sub>), 14.3 (CH<sub>3</sub>). IR (ATR): 2937, 1702, 1630, 1498, 1452, 1154, 1029, 991, 875 cm<sup>-1</sup>. MS (EI) *m/z* (relative intensity) 291 (5) [M<sup>+</sup>], 203 (30), 174 (5), 146 (6), 72 (100). HR-MS (EI): *m/z* calcd for C<sub>16</sub>H<sub>21</sub>NO<sub>4</sub> 291.1471, found 291.1482. The analytical data are in accordance with those reported in the literature.<sup>2</sup>

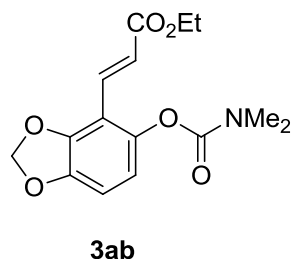

**(E)-Ethyl 3-{5-[(N,N-dimethylcarbamoyl)oxy]benzo[d][1,3]dioxol-4-yl}acrylate**

**(3ab):** The general procedure A was followed using **1ab** (105 mg, 0.50 mmol) and

ethyl acrylate (**2a**) (100 mg, 1.00 mmol). Purification by column chromatography (*n*-hexane/EtOAc: 10/1→5/1) yielded **3ab** (100 mg, 66%) as a white solid (M.p.: 115–117 °C). <sup>1</sup>H-NMR (300 MHz, CDCl<sub>3</sub>): δ = 7.59 (d, *J* = 16.1 Hz, 1H), 6.75 (d, *J* = 8.4 Hz, 1H), 6.73 (d, *J* = 16.1 Hz, 1H), 6.57 (d, *J* = 8.4 Hz, 1H), 6.05 (s, 2H), 4.22 (q, *J* = 7.2 Hz, 2H), 3.13 (s, 3H), 2.98 (s, 3H), 1.29 (t, *J* = 7.2 Hz, 3H). <sup>13</sup>C-NMR (75 MHz, CDCl<sub>3</sub>): δ = 167.3 (C<sub>q</sub>), 154.7 (C<sub>q</sub>), 147.0 (C<sub>q</sub>), 145.2 (C<sub>q</sub>), 144.2 (C<sub>q</sub>), 133.4 (CH), 122.7 (CH), 115.3 (CH), 112.3 (C<sub>q</sub>), 108.9 (CH), 102.2 (CH<sub>2</sub>), 60.4 (CH<sub>2</sub>), 36.9 (CH<sub>3</sub>), 36.5 (CH<sub>3</sub>), 14.3 (CH<sub>3</sub>). IR (ATR): 2909, 1714, 1633, 1457, 1304, 1201, 1162, 977, 862 cm<sup>-1</sup>. MS (EI) *m/z* (relative intensity) 307 (5) [M<sup>+</sup>], 219 (5), 190 (8), 72 (100), 43 (7). HR-MS (EI): *m/z* calcd for C<sub>15</sub>H<sub>17</sub>NO<sub>6</sub> 307.1056, found 307.1059.

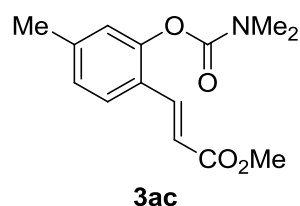

**(E)-Methyl 3-{2-[(*N,N*-dimethylcarbamoyl)oxy]-4-methylphenyl}acrylate (**3ac**):**

The general procedure A was followed using **1a** (90 mg, 0.50 mmol) and methyl acrylate (**2b**) (86 mg, 1.00 mmol). Purification by column chromatography (*n*-hexane/EtOAc: 4/1) yielded **3ac** (114 mg, 87%) as a white solid (M.p.: 77–80 °C). <sup>1</sup>H-NMR (300 MHz, CDCl<sub>3</sub>): δ = 7.79 (d, *J* = 16.1 Hz, 1H), 7.49 (d, *J* = 8.0 Hz, 1H), 7.01 (dd, *J* = 8.0, 1.6 Hz, 1H), 6.97 (d, *J* = 1.6 Hz, 1H), 6.39 (d, *J* = 16.1 Hz, 1H), 3.77 (s, 3H), 3.15 (s, 3H), 3.01 (s, 3H), 2.34 (s, 3H). <sup>13</sup>C-NMR (75 MHz, CDCl<sub>3</sub>): δ = 167.4 (C<sub>q</sub>), 154.3 (C<sub>q</sub>), 150.0 (C<sub>q</sub>), 141.9 (C<sub>q</sub>), 138.6 (CH), 127.1 (CH), 126.6 (CH), 124.3

(C<sub>q</sub>), 123.8 (CH), 118.1 (CH), 51.5 (CH<sub>3</sub>), 36.7 (CH<sub>3</sub>), 36.4 (CH<sub>3</sub>), 21.3 (CH<sub>3</sub>). IR (ATR): 2949, 1737, 1715, 1631, 1383, 1321, 1276, 1161, 985, 807, 746 cm<sup>-1</sup>. MS (EI) *m/z* (relative intensity) 263 (5) [M<sup>+</sup>], 175 (58), 160 (5), 132 (13), 72 (100). HR-MS (ESI): *m/z* calcd for C<sub>14</sub>H<sub>17</sub>NO<sub>4</sub>+H<sup>+</sup> 264.1230, found 264.1230.

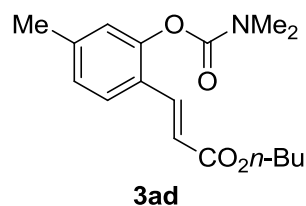

**(*E*)-*n*-Butyl 3-{2-[(*N,N*-dimethylcarbamoyl)oxy]-4-methylphenyl}acrylate (**3ad**):**

The general procedure A was followed using **1a** (90 mg, 0.50 mmol) and *n*-butyl acrylate (**2c**) (128 mg, 1.00 mmol). Purification by column chromatography (*n*-hexane/EtOAc: 4/1) yielded **3ad** (148 mg, 97%) as a colourless oil. <sup>1</sup>H-NMR (300 MHz, CDCl<sub>3</sub>): δ = 7.77 (d, *J* = 16.1 Hz, 1H), 7.48 (d, *J* = 8.0 Hz, 1H), 7.00 (dd, *J* = 8.0, 1.6 Hz, 1H), 6.96 (d, *J* = 1.6 Hz, 1H), 6.37 (d, *J* = 16.1 Hz, 1H), 4.16 (t, *J* = 6.6 Hz, 2H), 3.14 (s, 3H), 3.00 (s, 3H), 2.33 (s, 3H), 1.74–1.58 (m, 2H), 1.50–1.30 (m, 2H), 0.94 (t, *J* = 7.4 Hz, 3H). <sup>13</sup>C-NMR (75 MHz, CDCl<sub>3</sub>): δ = 167.1 (C<sub>q</sub>), 154.4 (C<sub>q</sub>), 150.0 (C<sub>q</sub>), 141.9 (C<sub>q</sub>), 138.2 (CH), 127.0 (CH), 126.7 (CH), 124.5 (C<sub>q</sub>), 123.9 (CH), 118.6 (CH), 64.3 (CH<sub>2</sub>), 36.8 (CH<sub>3</sub>), 36.5 (CH<sub>3</sub>), 30.7 (CH<sub>2</sub>), 21.4 (CH<sub>3</sub>), 19.2 (CH<sub>2</sub>), 13.7 (CH<sub>3</sub>). IR (ATR): 2958, 1709, 1633, 1381, 1269, 1244, 1150, 813, 732 cm<sup>-1</sup>. MS (EI) *m/z* (relative intensity) 305 (4) [M<sup>+</sup>], 217 (58), 161 (32), 132 (21), 103 (8), 72 (100), 56 (8), 41 (18). HR-MS (ESI): *m/z* calcd for C<sub>17</sub>H<sub>23</sub>NO<sub>4</sub>+H<sup>+</sup> 306.1700,

found 306.1702. The analytical data are in accordance with those reported in the literature.<sup>3</sup>

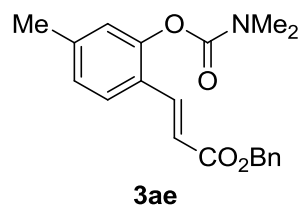

**(E)-Benzyl 3-{2-[(N,N-dimethylcarbamoyl)oxy]-4-methylphenyl}acrylate (3ae):**

The general procedure A was followed using **1a** (90 mg, 0.50 mmol) and benzyl acrylate (**2d**) (162 mg, 1.00 mmol). Purification by column chromatography (*n*-hexane/EtOAc: 4/1) yielded **3ae** (161 mg, 95%) as a colourless oil. <sup>1</sup>H-NMR (300 MHz, CDCl<sub>3</sub>):  $\delta$  = 7.84 (d, *J* = 16.1 Hz, 1H), 7.49 (d, *J* = 8.0 Hz, 1H), 7.43–7.27 (m, 5H), 7.01 (d, *J* = 8.0 Hz, 1H), 6.98 (s, 1H), 6.43 (d, *J* = 16.1 Hz, 1H), 5.22 (s, 2H), 3.11 (s, 3H), 2.99 (s, 3H), 2.34 (s, 3H). <sup>13</sup>C-NMR (75 MHz, CDCl<sub>3</sub>):  $\delta$  = 166.7 (C<sub>q</sub>), 154.3 (C<sub>q</sub>), 150.0 (C<sub>q</sub>), 142.0 (C<sub>q</sub>), 138.8 (CH), 136.0 (C<sub>q</sub>), 128.5 (CH), 128.1 (CH), 128.1 (CH), 127.0 (CH), 126.7 (CH), 124.3 (C<sub>q</sub>), 123.8 (CH), 118.1 (CH), 66.2 (CH<sub>2</sub>), 36.7 (CH<sub>3</sub>), 36.4 (CH<sub>3</sub>), 21.3 (CH<sub>3</sub>). IR (ATR): 2937, 1710, 1631, 1380, 1245, 1147, 982, 813, 734, 696 cm<sup>-1</sup>. MS (EI) *m/z* (relative intensity) 339 (1) [M<sup>+</sup>], 248 (5), 160 (36), 132 (23), 91 (38), 72 (100). HR-MS (ESI): *m/z* calcd for C<sub>20</sub>H<sub>21</sub>NO<sub>4</sub>+H<sup>+</sup> 340.1543, found 340.1547.

### Deprotection of Carbamate **3a**<sup>4</sup>

To a solution of the carbamate **3a** (170 mg, 0.61 mmol) in EtOH (5 mL) was added NaOH (245 mg, 6.10 mmol). The reaction mixture was stirred at 80 °C for 15 h. At ambient temperature, EtOH was evaporated under reduced pressure, the residue was diluted with Et<sub>2</sub>O (20 mL), and the excess of NaOH was neutralized at 0 °C using a solution of 2 M HCl (5 mL). The aqueous solution was extracted with Et<sub>2</sub>O (3×20 mL), and the combined organic layers were washed with brine, dried over Na<sub>2</sub>SO<sub>4</sub>, and evaporated under reduced pressure. The crude product was washed with CH<sub>2</sub>Cl<sub>2</sub> to afford **4a** (80 mg, 73%) as a yellow solid (M.p.: 191–193 °C).

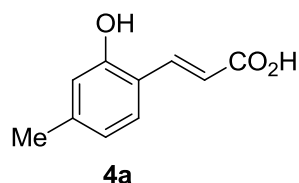

**(E)-3-(2-Hydroxy-4-methylphenyl)acrylic acid (4a):** <sup>1</sup>H-NMR (300 MHz, *d*<sup>6</sup>-DMSO):  $\delta$  = 12.04 (s<sub>br</sub>, 1H), 10.00 (s, 1H), 7.78 (d, *J* = 16.1 Hz, 1H), 7.43 (d, *J* = 8.0 Hz, 1H), 6.71 (s, 1H), 6.65 (d, *J* = 8.0 Hz, 1H), 6.43 (d, *J* = 16.1 Hz, 1H), 2.23 (s, 3H). <sup>13</sup>C-NMR (75 MHz, DMSO):  $\delta$  = 168.0 (C<sub>q</sub>), 156.4 (C<sub>q</sub>), 141.4 (C<sub>q</sub>), 139.5 (CH), 128.5 (CH), 120.3 (CH), 118.2 (C<sub>q</sub>), 117.0 (CH), 116.4 (CH), 21.0 (CH<sub>3</sub>). IR (ATR): 2925, 1660, 1601, 1421, 1298, 1259, 1205, 986, 854 cm<sup>-1</sup>. MS (EI) *m/z* (relative intensity) 178 (35) [M<sup>+</sup>], 160 (47), 132 (100), 104 (32), 77 (30), 43 (18). HR-MS (EI): *m/z* calcd for C<sub>10</sub>H<sub>10</sub>O<sub>3</sub> 178.0630, found 178.0634.

## Intermolecular Competition Experiment with Carbamates **1n** and **1af** (Scheme 6)

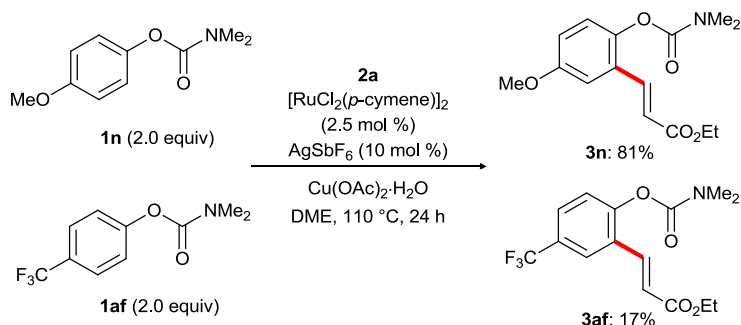

A suspension of **1n** (195 mg, 1.00 mmol), **1af** (233mg, 1.00 mmol), ethyl acrylate (**2a**) (50 mg, 0.50 mmol),  $[\text{RuCl}_2(p\text{-cymene})]_2$  (7.7 mg, 2.5 mol %),  $\text{AgSbF}_6$  (17.2 mg, 10 mol %) and  $\text{Cu}(\text{OAc})_2 \cdot \text{H}_2\text{O}$  (200 mg, 1.00 mmol) in DME (3.0 mL) was stirred at 110 °C for 24 h under an atmosphere of  $\text{N}_2$ . At ambient temperature, EtOAc (15 mL) was added and the mixture was filtered through silica. The solvents were removed *in vacuo*. Purification of the remaining residue by column chromatography (*n*-hexane/EtOAc: 10/1) yielded **3n** (119 mg, 81%) as a white solid and **3af** (28 mg, 17%) as a white solid (M.p.: 107–109 °C).

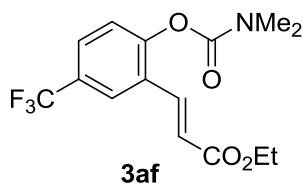

### (*E*)-Ethyl 3-{2-[(*N,N*-dimethylcarbamoyl)oxy]-5-(trifluoromethyl)phenyl}

**acrylate (3af):**  $^1\text{H}$ -NMR (300 MHz,  $\text{CDCl}_3$ ):  $\delta$  = 7.83 (d,  $J$  = 1.9 Hz, 1H), 7.80 (d,  $J$  = 16.3 Hz, 1H), 7.59 (dd,  $J$  = 8.6 Hz, 1.9 Hz, 1H), 7.30 (d,  $J$  = 8.6 Hz, 1H), 6.48 (d,  $J$  = 16.3 Hz, 1H), 4.24 (q,  $J$  = 7.2 Hz, 2H), 3.15 (s, 3H), 3.01 (s, 3H), 1.30 (t,  $J$  = 7.2 Hz, 3H).  $^{13}\text{C}$ -NMR (75 MHz,  $\text{CDCl}_3$ ):  $\delta$  = 166.3 ( $\text{C}_\text{q}$ ), 153.5 ( $\text{C}_\text{q}$ ), 152.3 ( $\text{C}_\text{q}$ ), 136.8 (CH),

127.9 (q,  $^2J_{\text{C-F}} = 33$  Hz,  $\text{C}_\text{q}$ ), 127.9 ( $\text{C}_\text{q}$ ), 127.5 (q,  $^3J_{\text{C-F}} = 4$  Hz, CH), 124.5 (q,  $^3J_{\text{C-F}} = 4$  Hz, CH), 124.0 (CH), 123.6 (q,  $^1J_{\text{C-F}} = 272$  Hz,  $\text{C}_\text{q}$ ), 121.6 (CH), 60.8 ( $\text{CH}_2$ ), 36.9 ( $\text{CH}_3$ ), 36.5 ( $\text{CH}_3$ ), 14.2 ( $\text{CH}_3$ ).  $^{19}\text{F}$ -NMR (282 MHz,  $\text{CDCl}_3$ ): -62.5 (s). IR (ATR): 2943, 1702, 1486, 1334, 1110, 1008, 858, 858  $\text{cm}^{-1}$ . MS (EI)  $m/z$  (relative intensity) 331 (5) [ $\text{M}^+$ ], 243 (18), 186 (8), 72 (100). HR-MS (ESI):  $m/z$  calcd for  $\text{C}_{15}\text{H}_{16}\text{F}_3\text{NO}_4 + \text{Na}^+$  354.0929, found 354.0924.



### Scheme S-1 Competition Experiment with Carbamates **1h** and **1j**

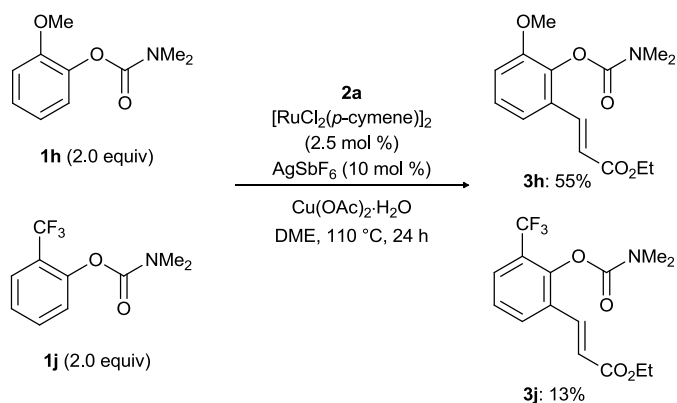

A suspension of **1h** (195 mg, 1.00 mmol), **1j** (233mg, 1.00 mmol), ethyl acrylate (**2a**) (50 mg, 0.50 mmol),  $[\text{RuCl}_2(p\text{-cymene})]_2$  (7.7 mg, 2.5 mol %),  $\text{AgSbF}_6$  (17.2 mg, 10 mol %) and  $\text{Cu}(\text{OAc})_2 \cdot \text{H}_2\text{O}$  (200 mg, 1.00 mmol) in DME (3.0 mL) was stirred at 110 °C for 24 h under an atmosphere of  $\text{N}_2$ . At ambient temperature, EtOAc (15 mL) was added and the mixture was filtered through silica. The solvents were removed *in vacuo*. Purification of the remaining residue by column chromatography (*n*-hexane/EtOAc: 10/1) yielded **3h** (81 mg, 55%) as a white solid and **3j** (21 mg, 13%) as a colorless oil.

## Reference

1. F. Garcia, M. MacPartlin, J. V. Morey, D. Nobuto, Y. Kondo, H. Naka, M. Uchiyama and A. E. H. Wheatley, *Eur. J. Org. Chem.*, 2008, 644.
2. C. Feng and T.-P. Loh, *Chem. Comm.*, 2011, **47**, 10458.
3. T.-J. Gong, B. Xiao, Z.-J. Liu, J. Wan, J. Xu, D.-F. Luo, Y. Fu and L. Liu, *Org. Lett.*, 2011, **13**, 3235.
4. R. Sanz, M. P. Castroviejo, Y. Fernandez and F. J. Fananas, *J. Org. Chem.*, 2005, **70**, 6548.

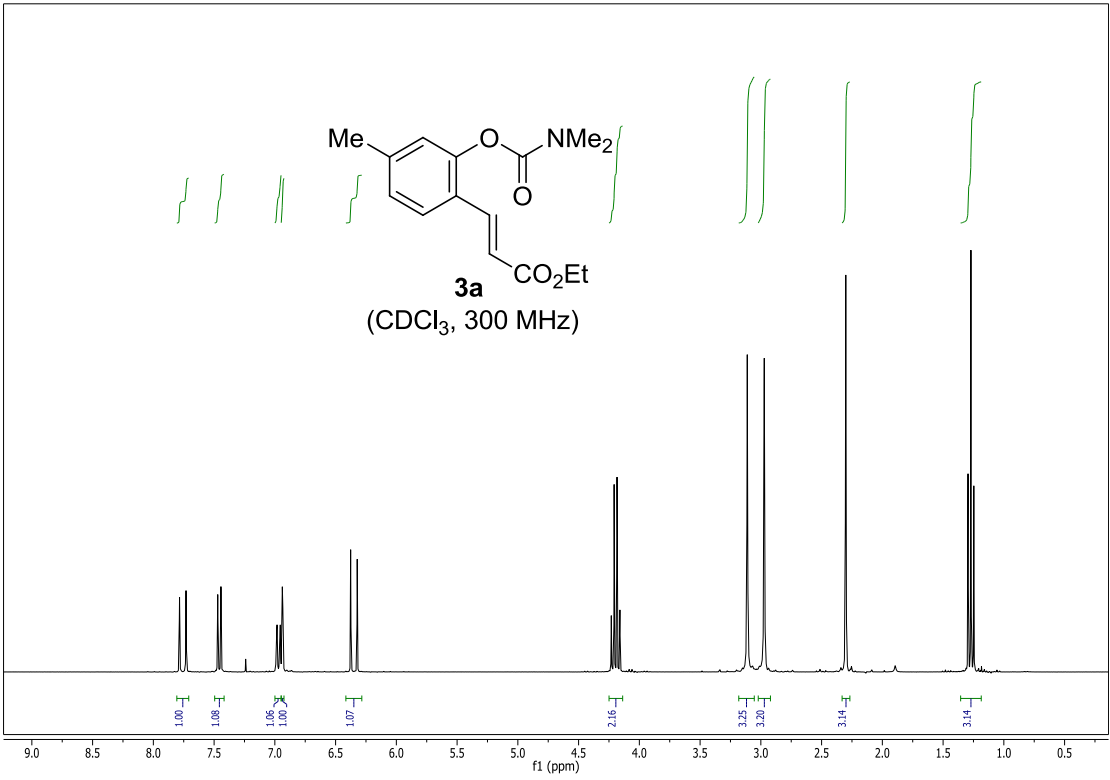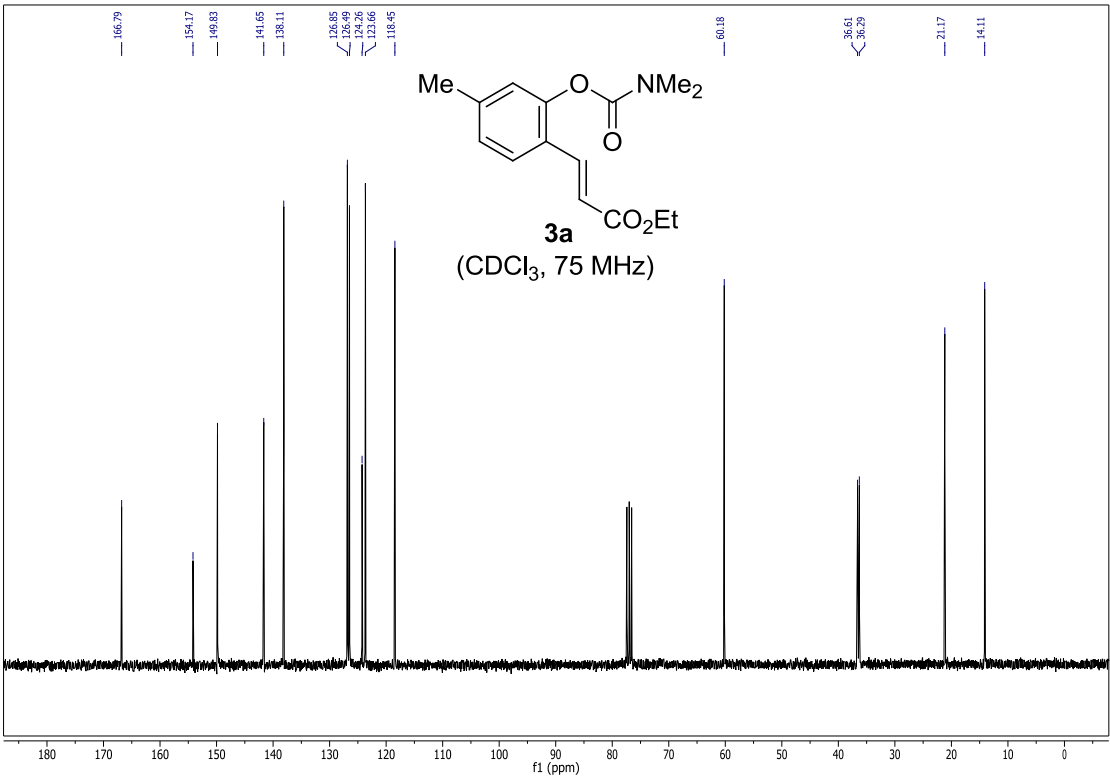

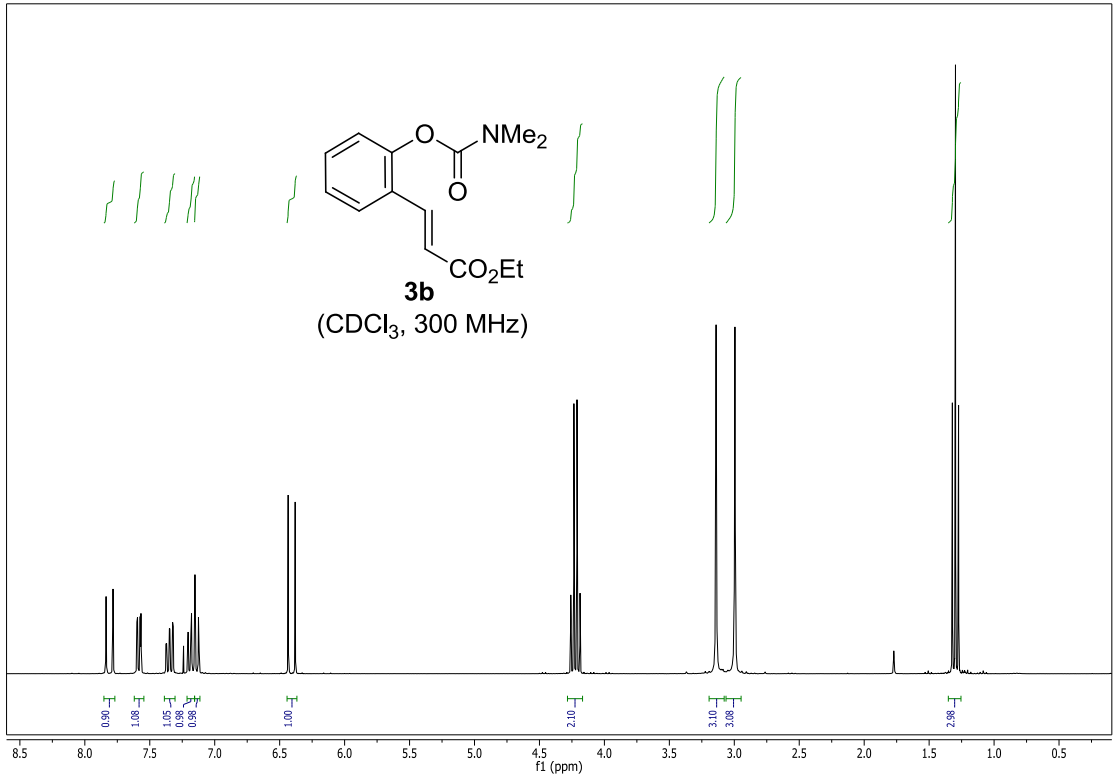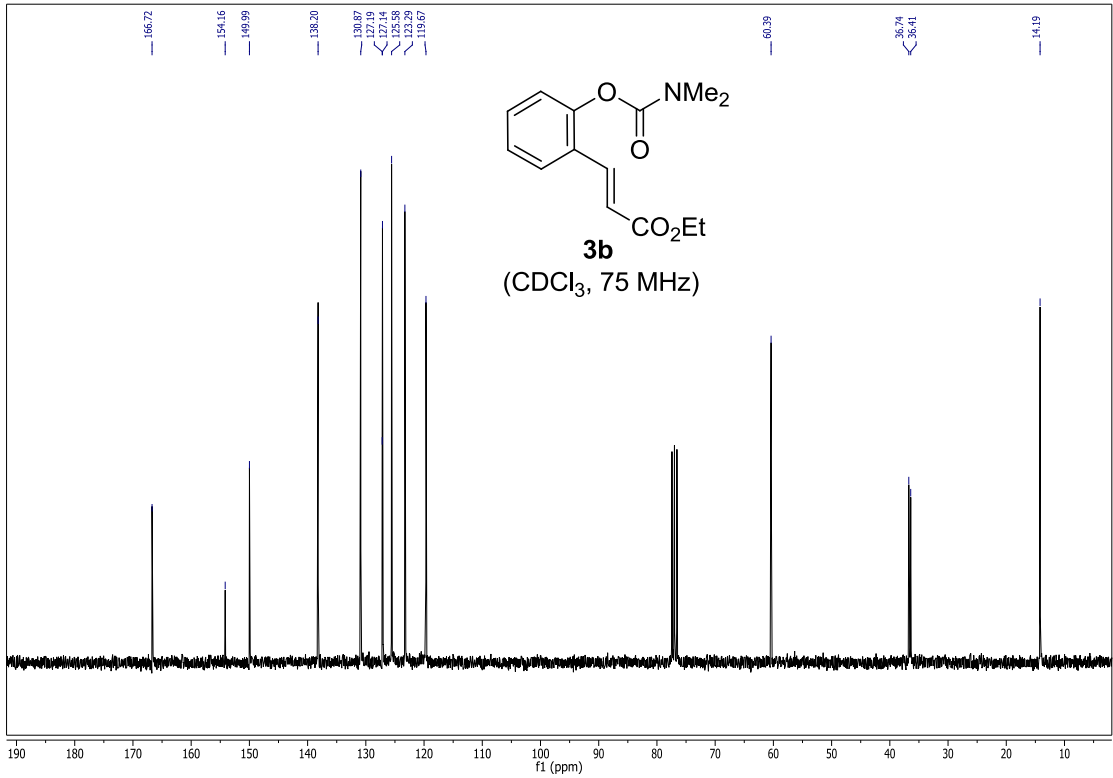

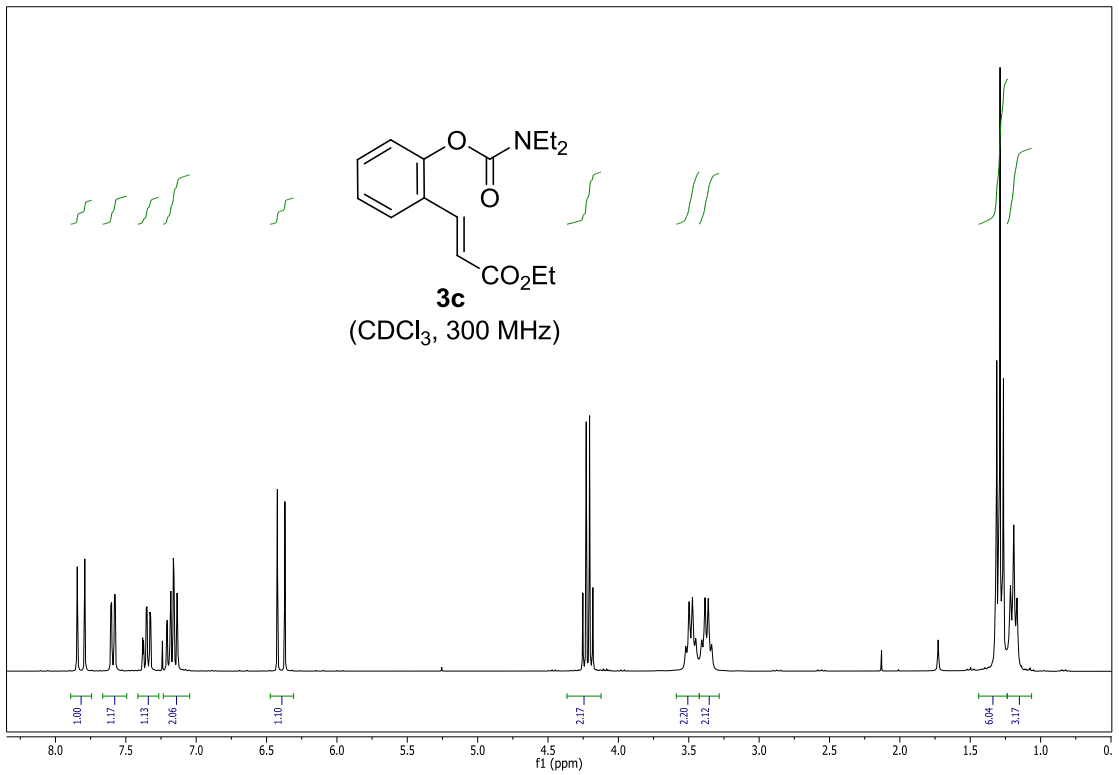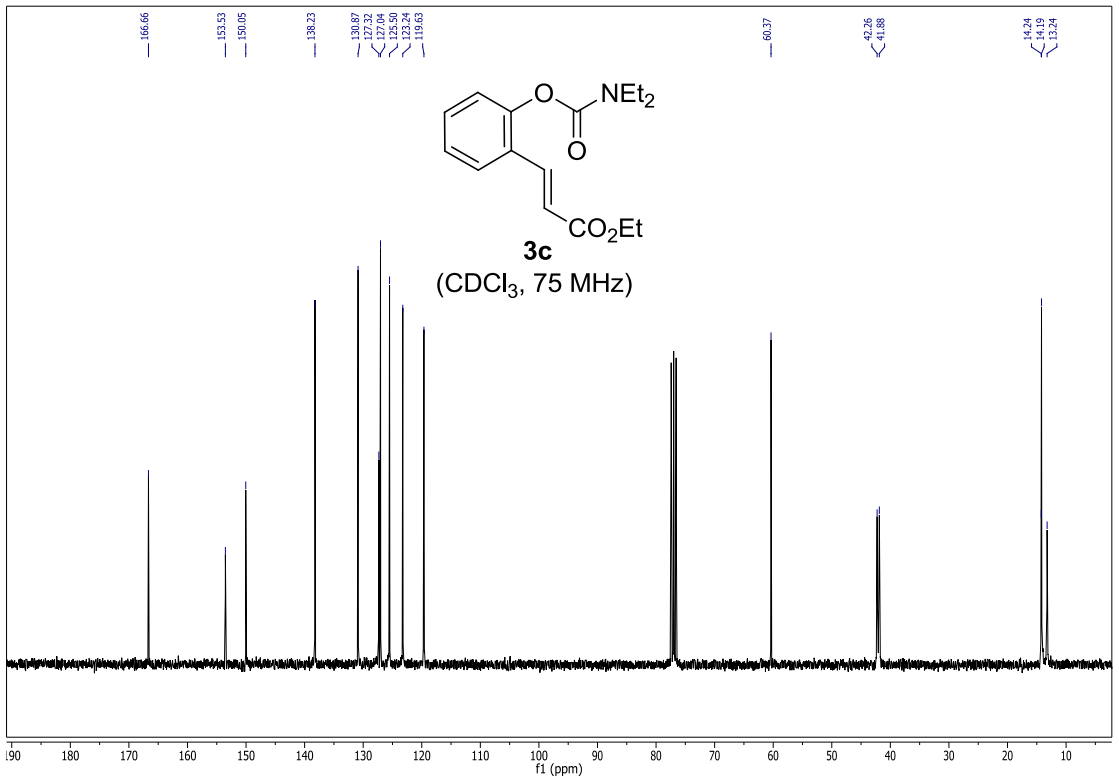

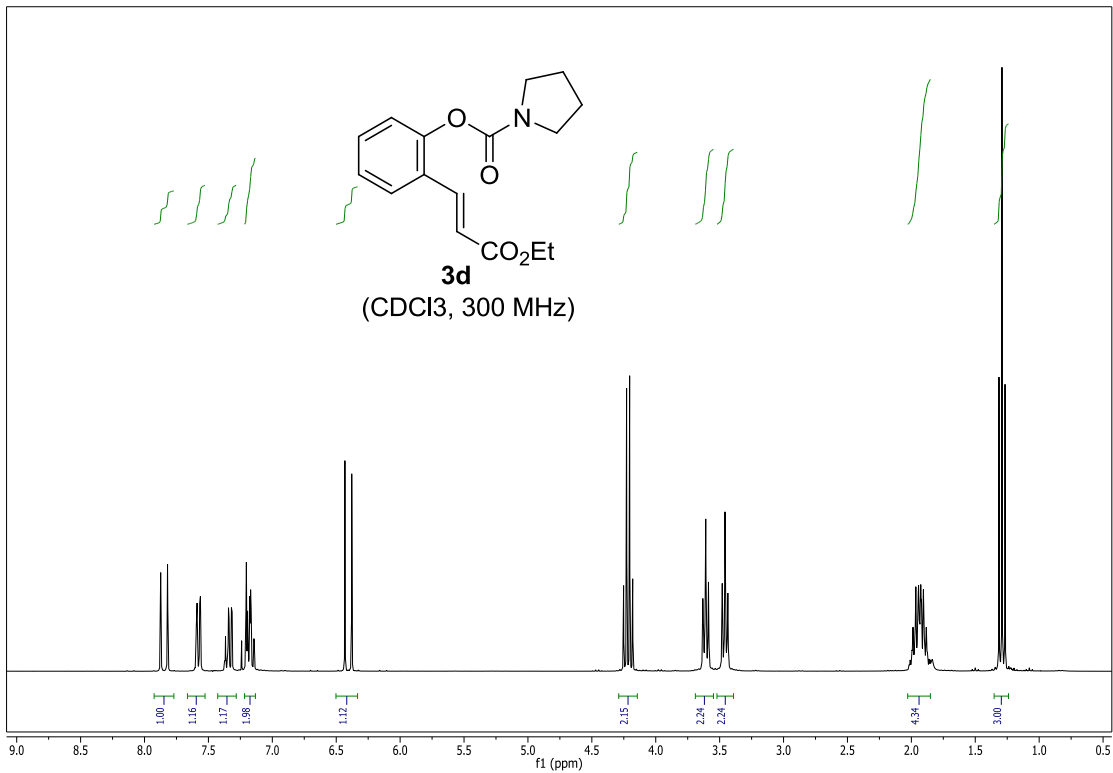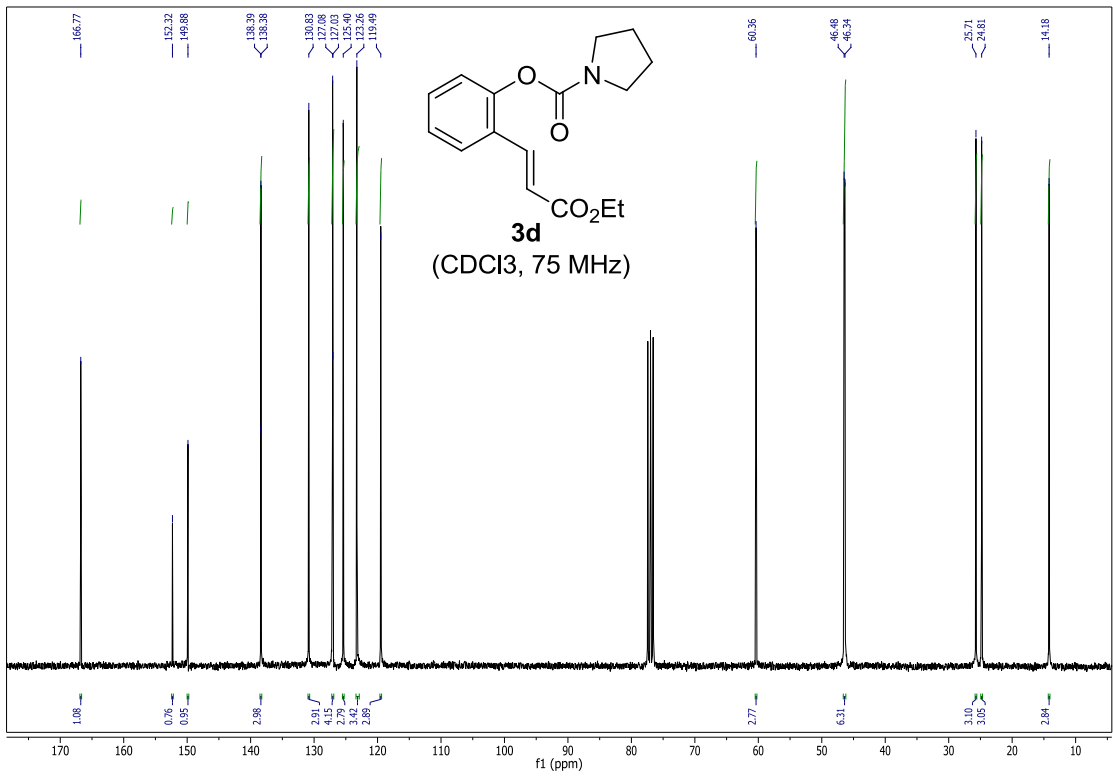

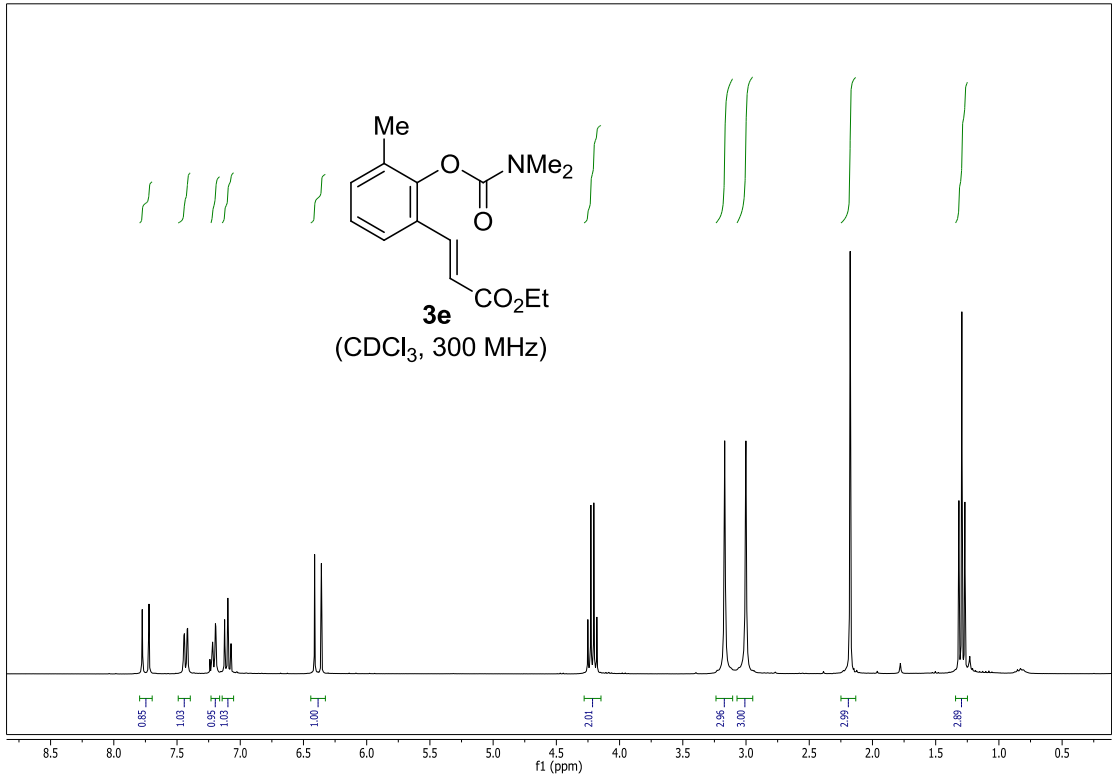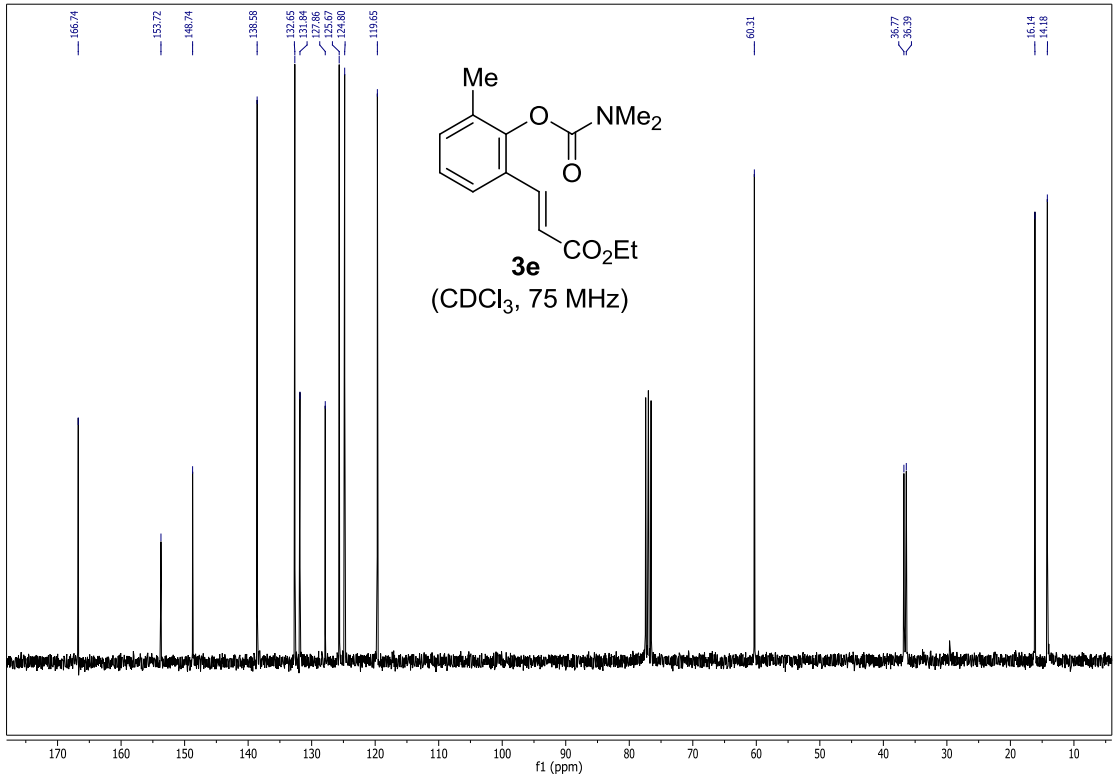

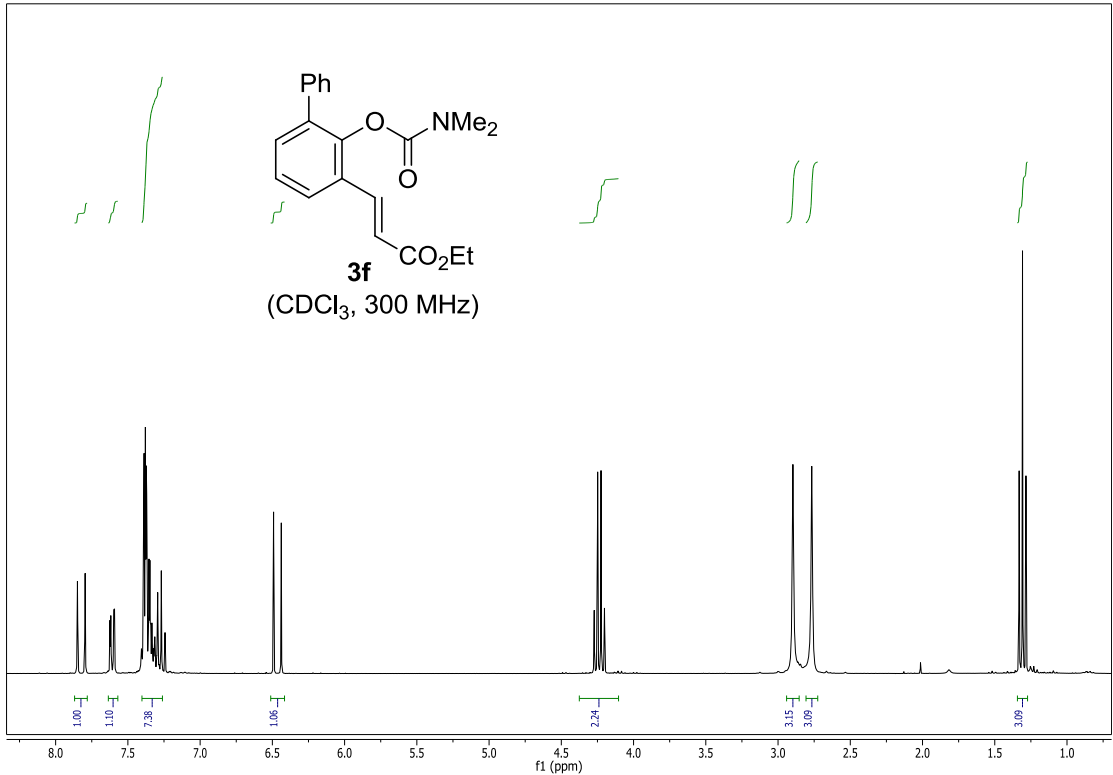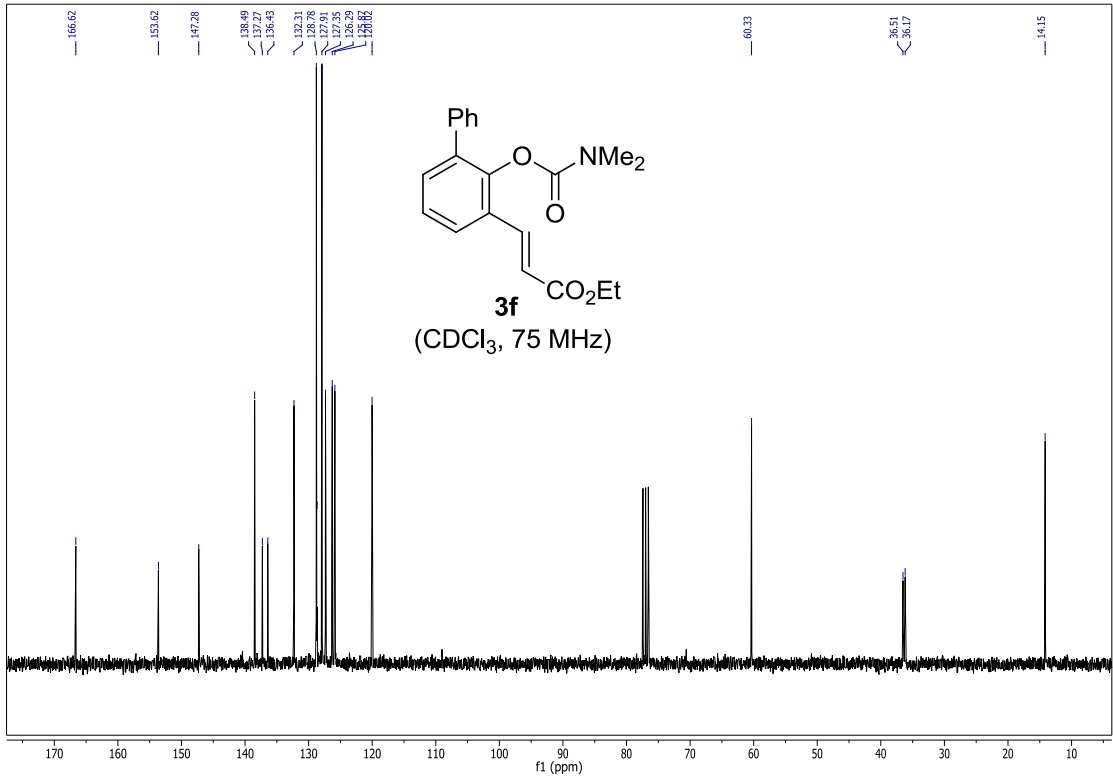



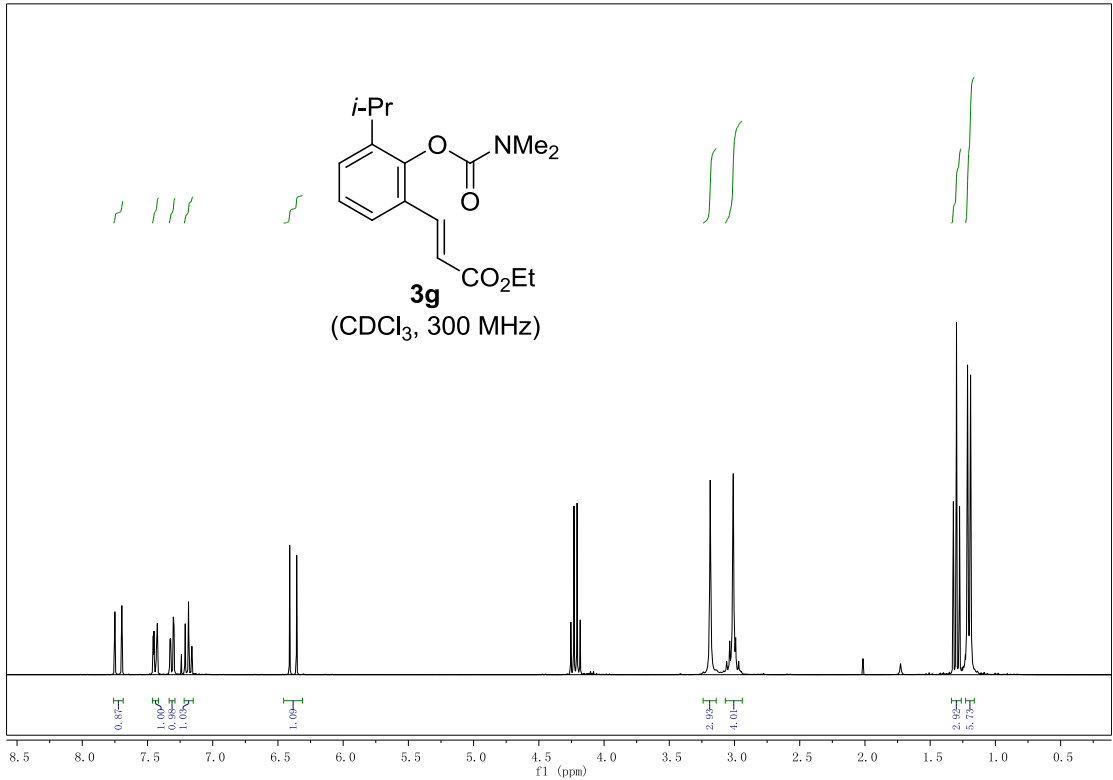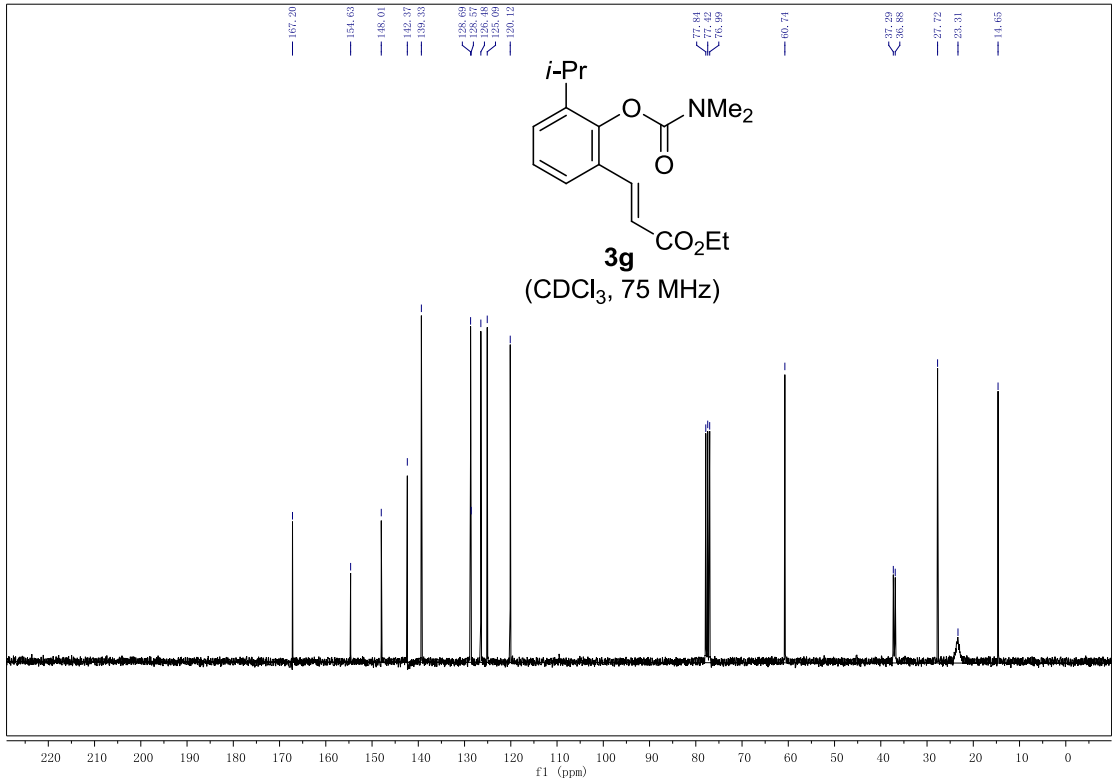

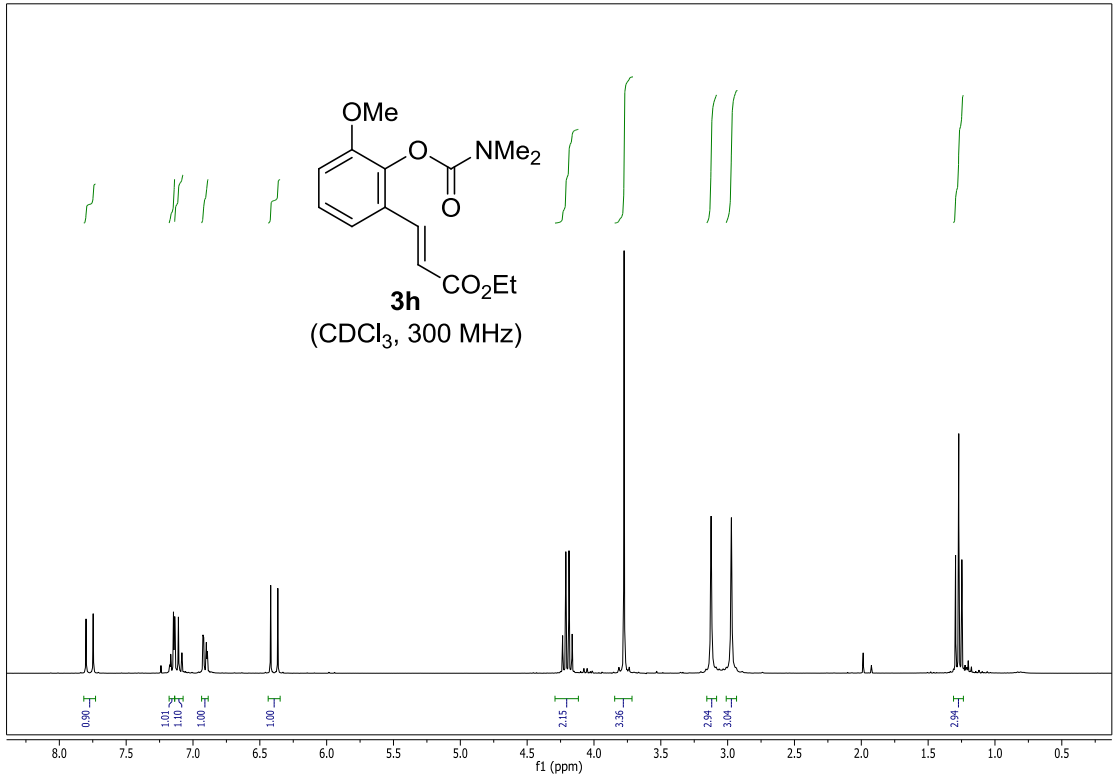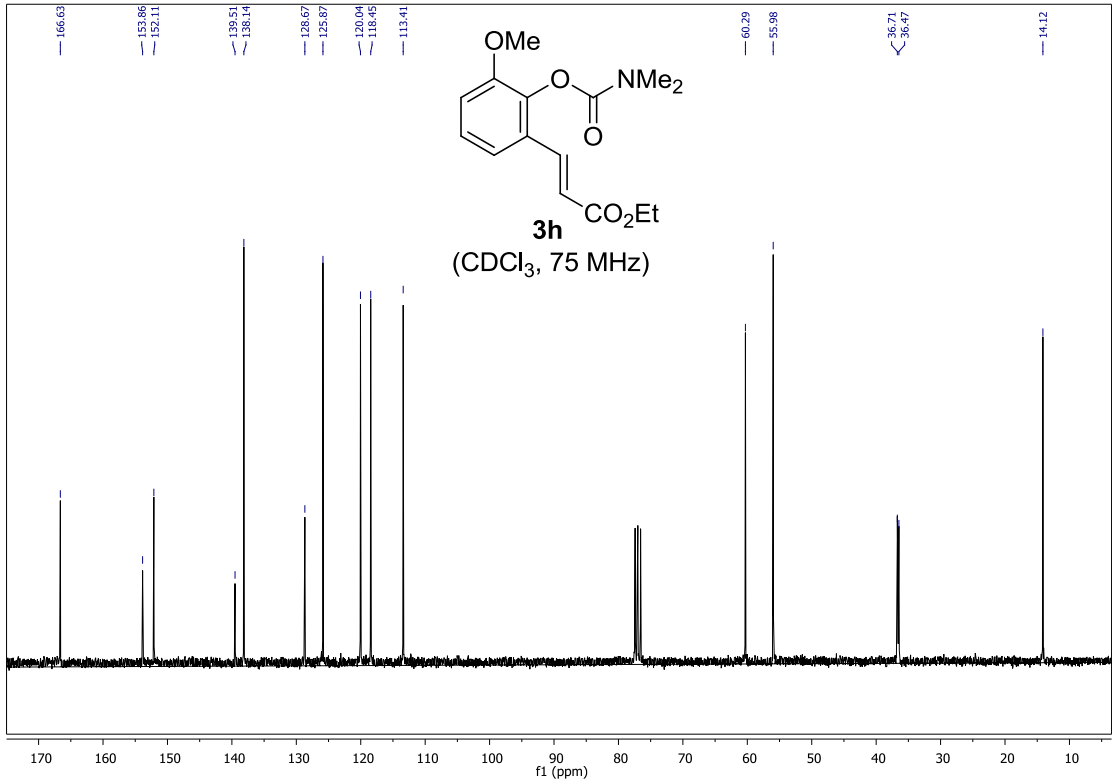

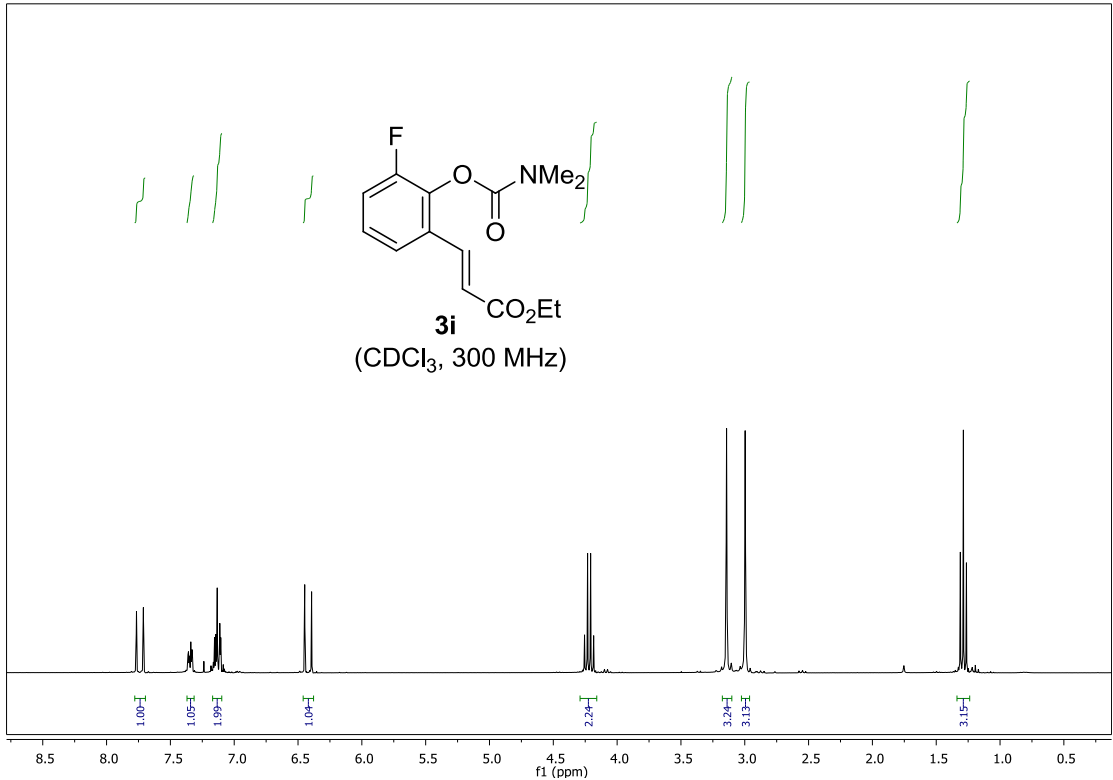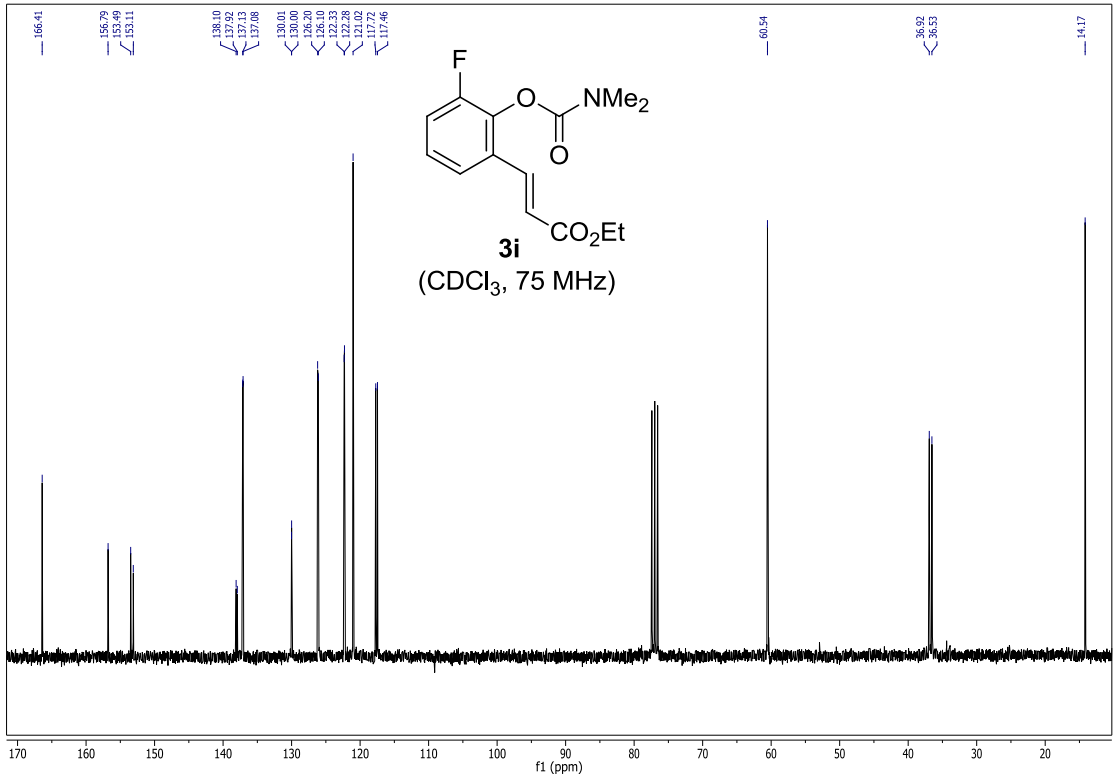

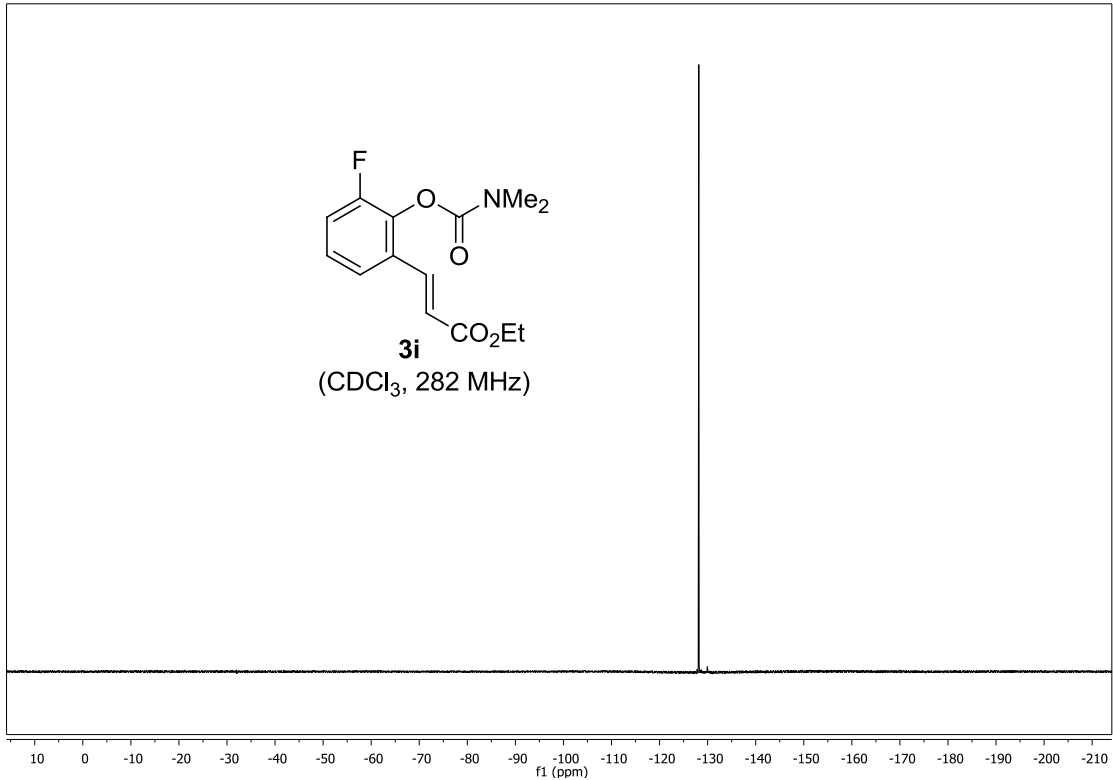

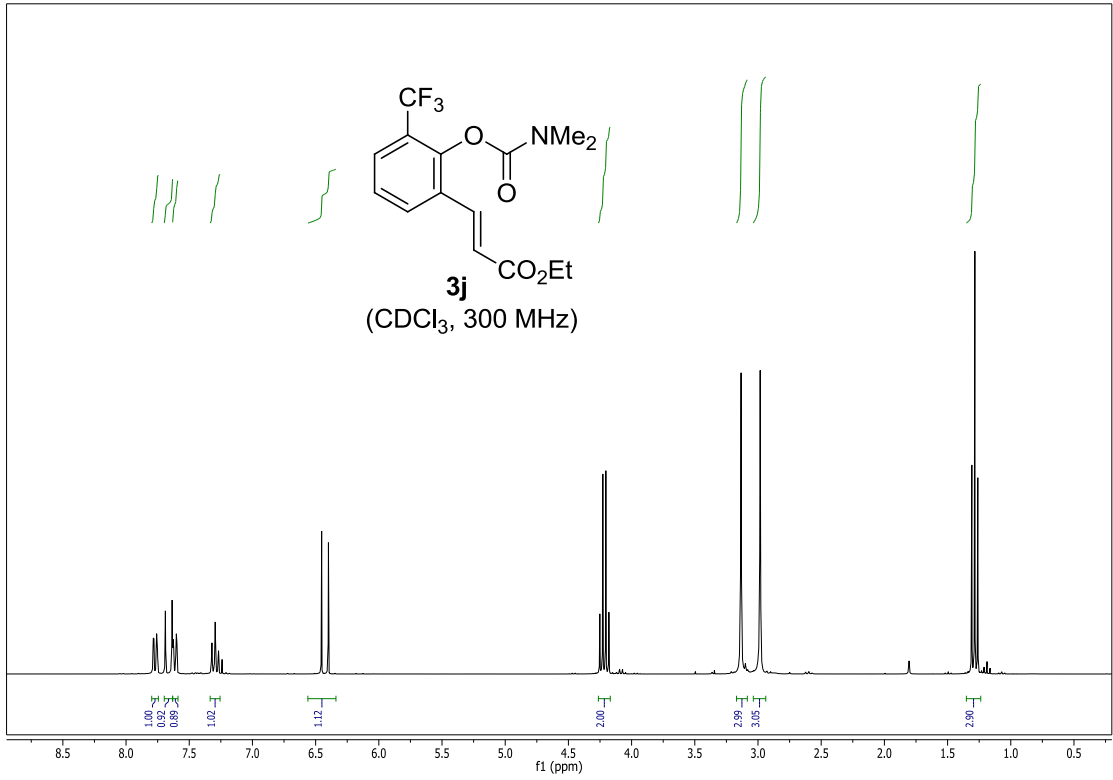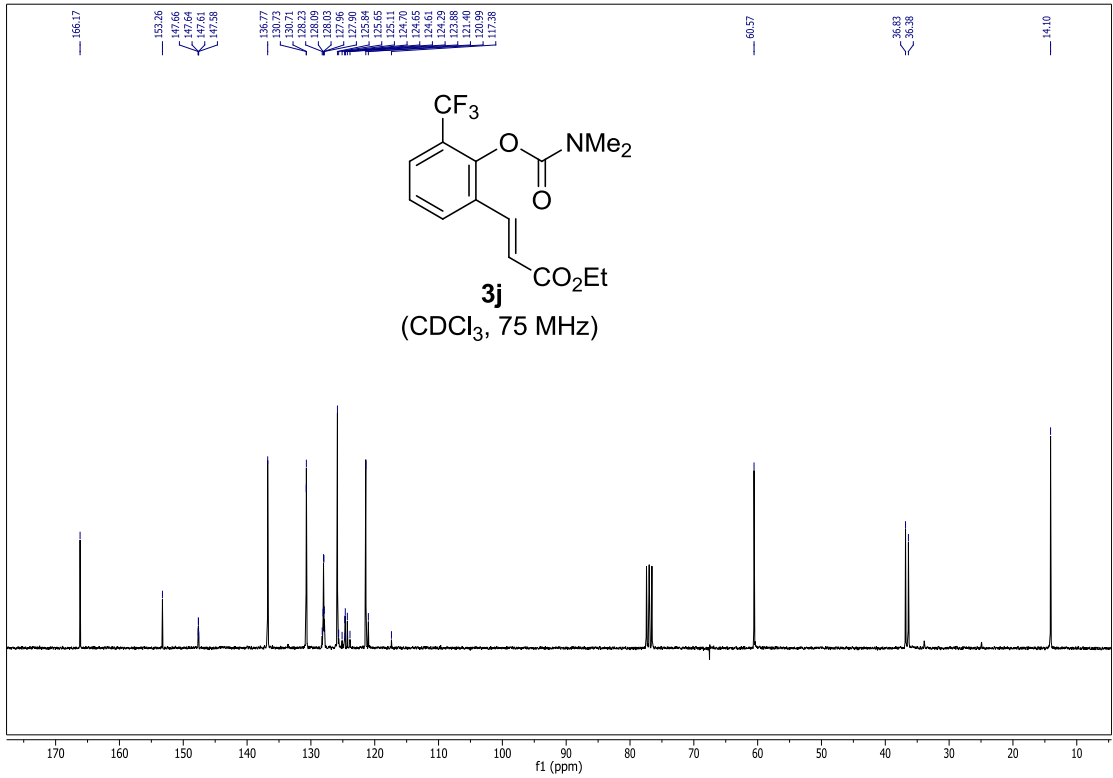

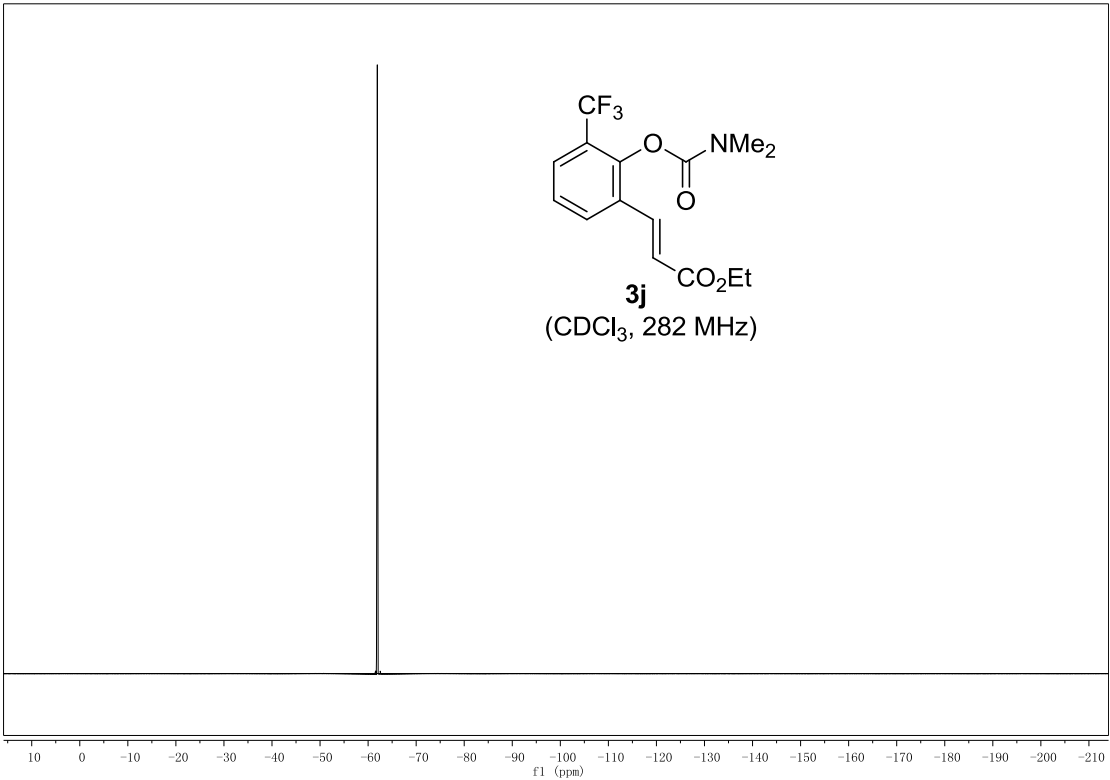

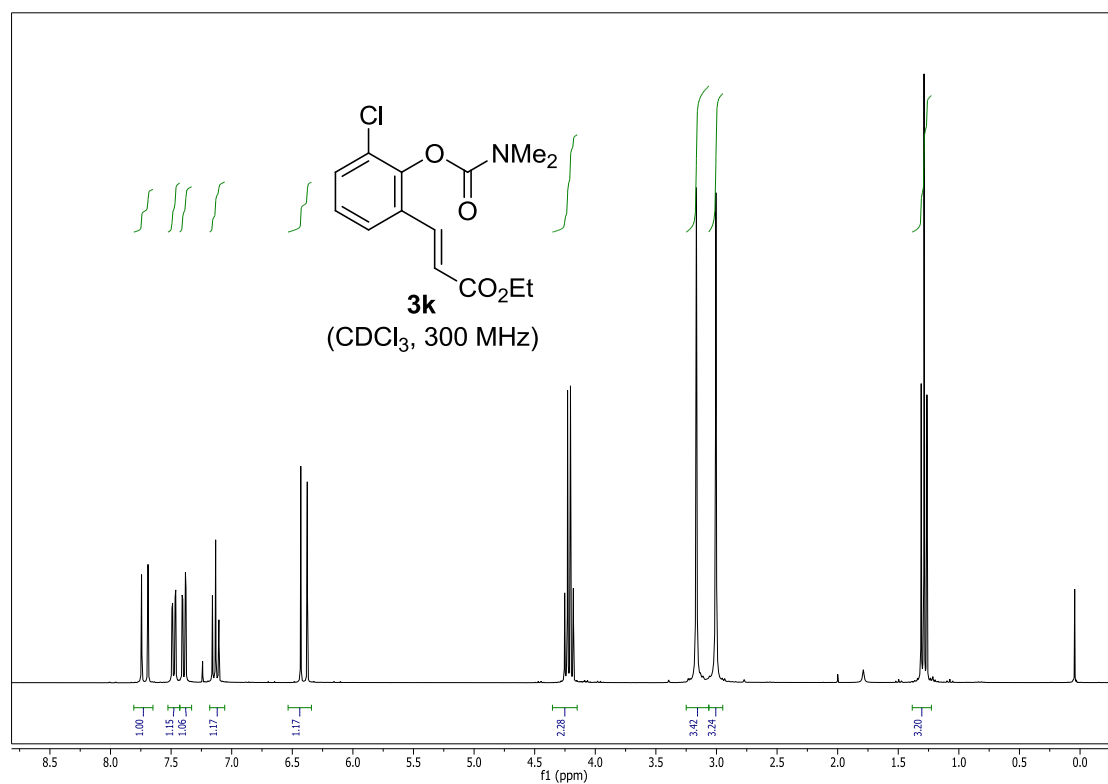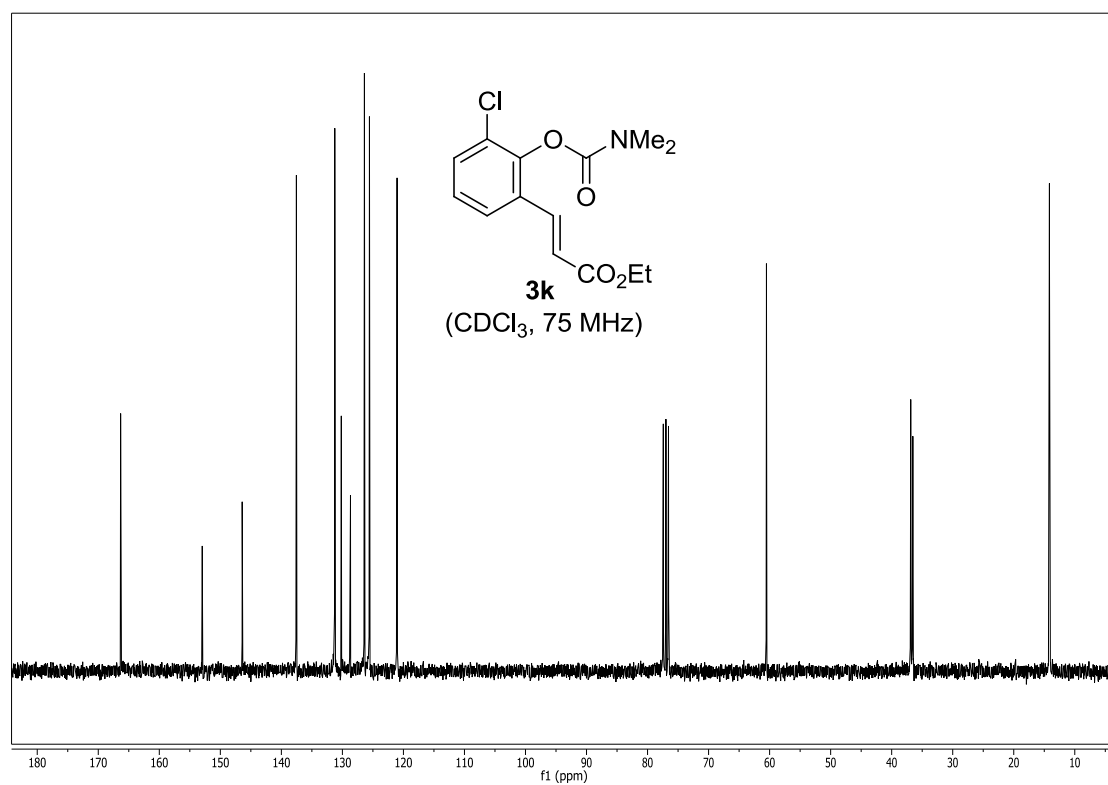

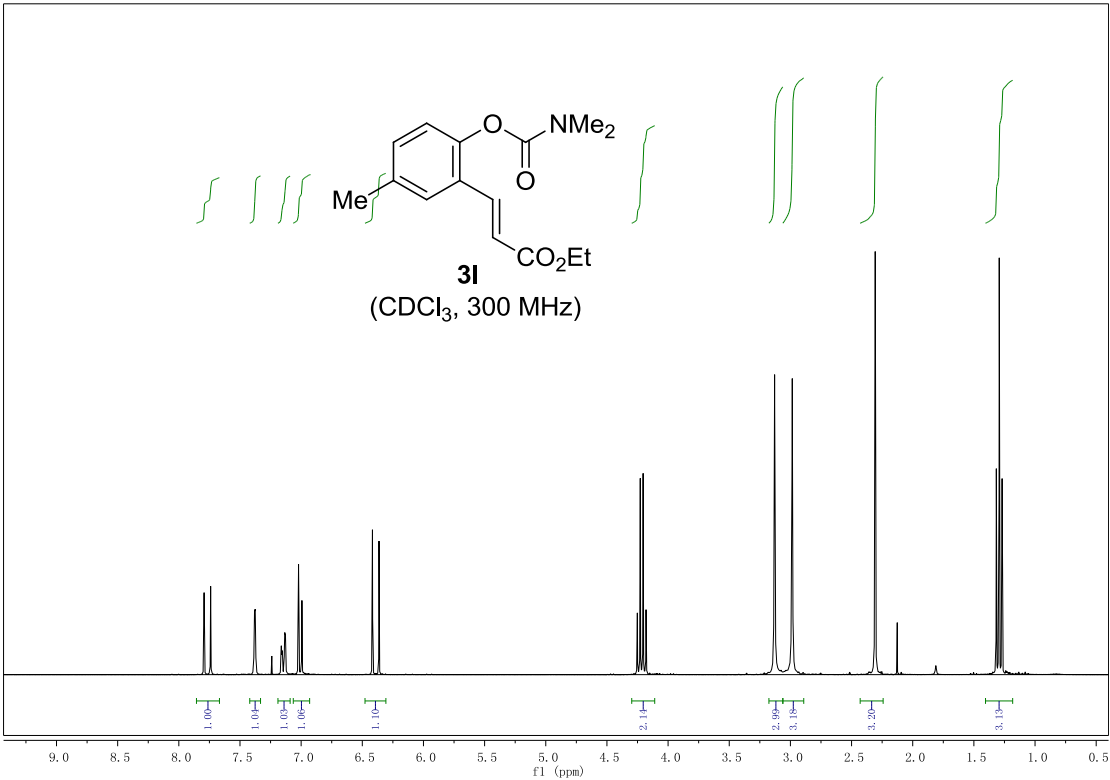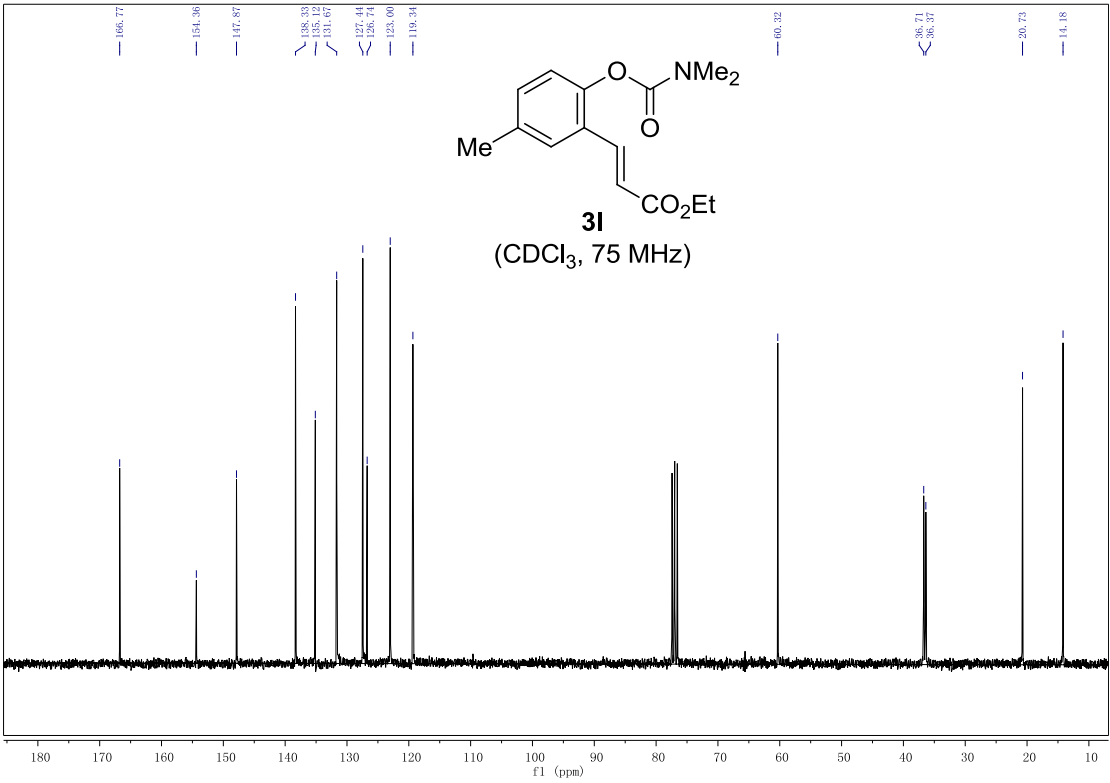



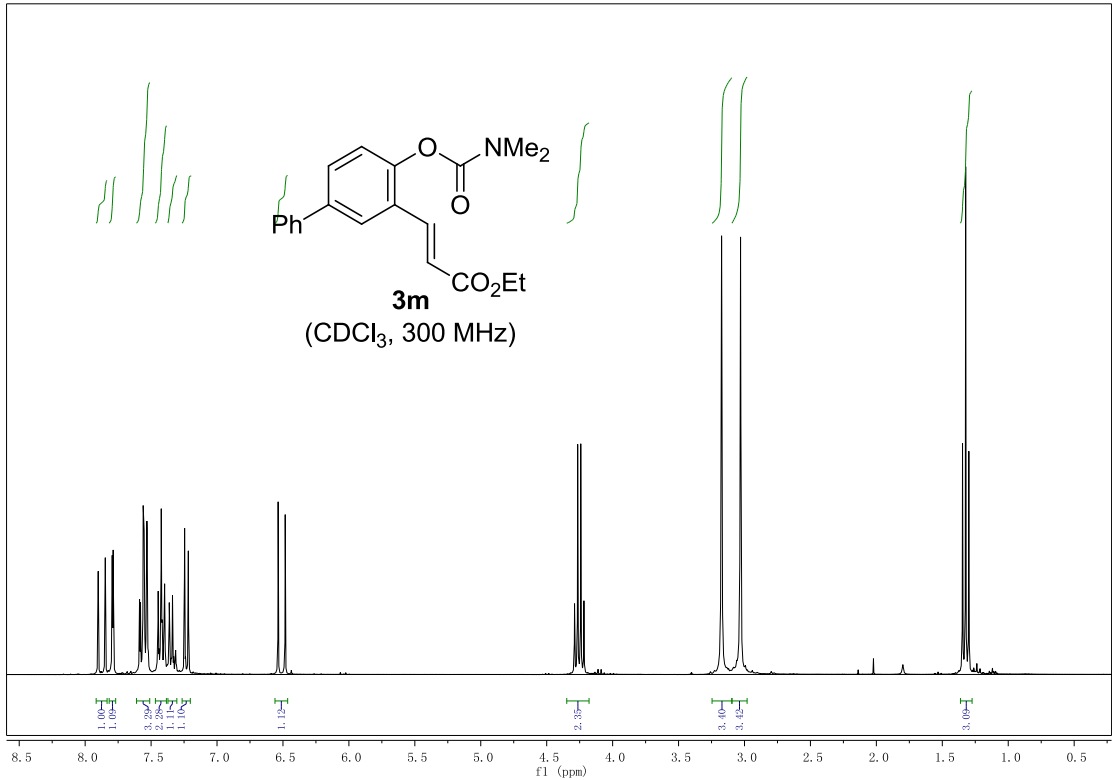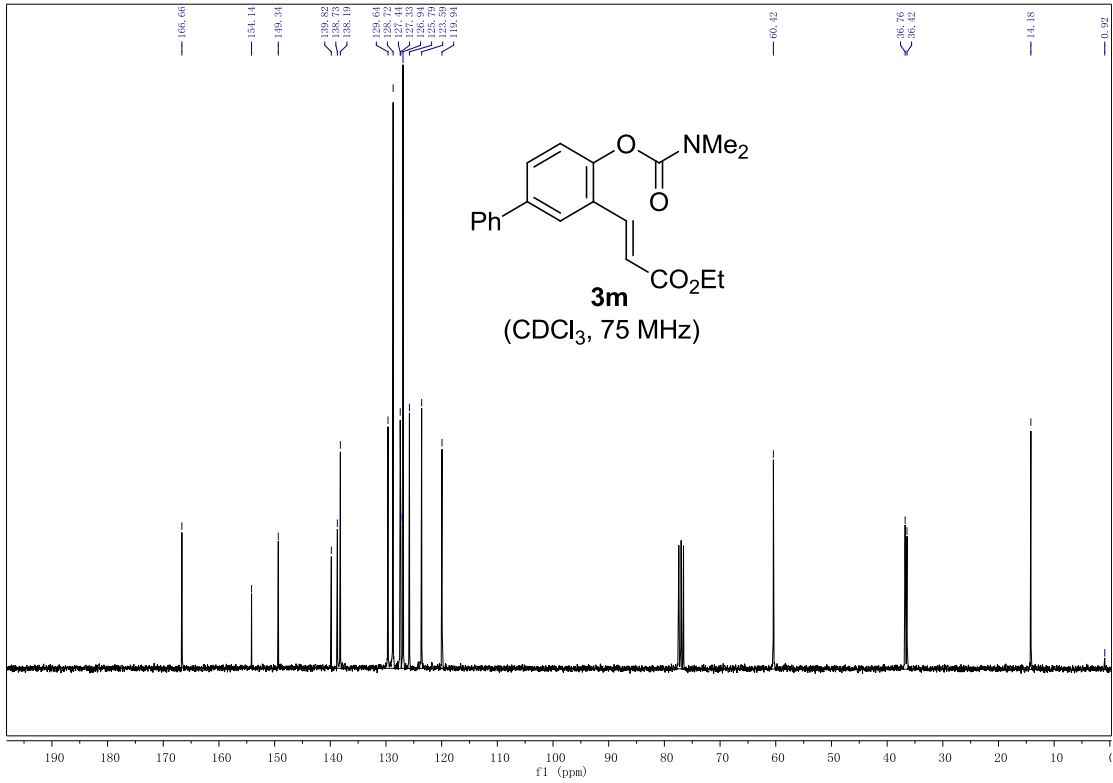

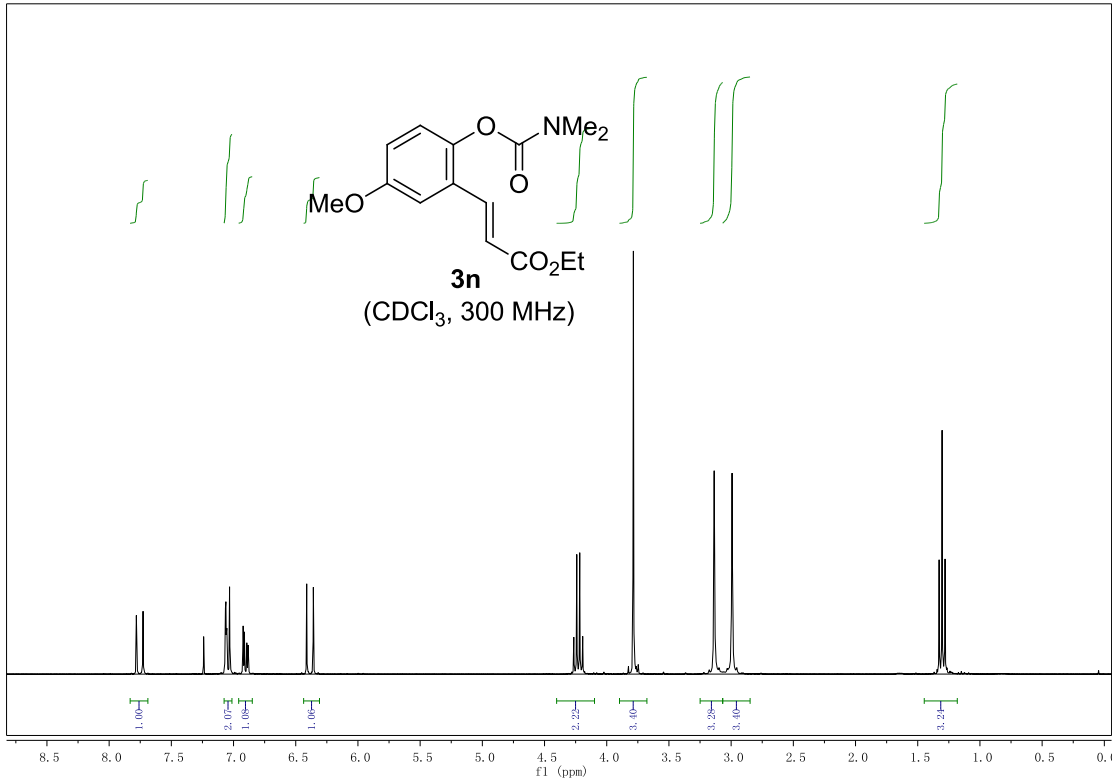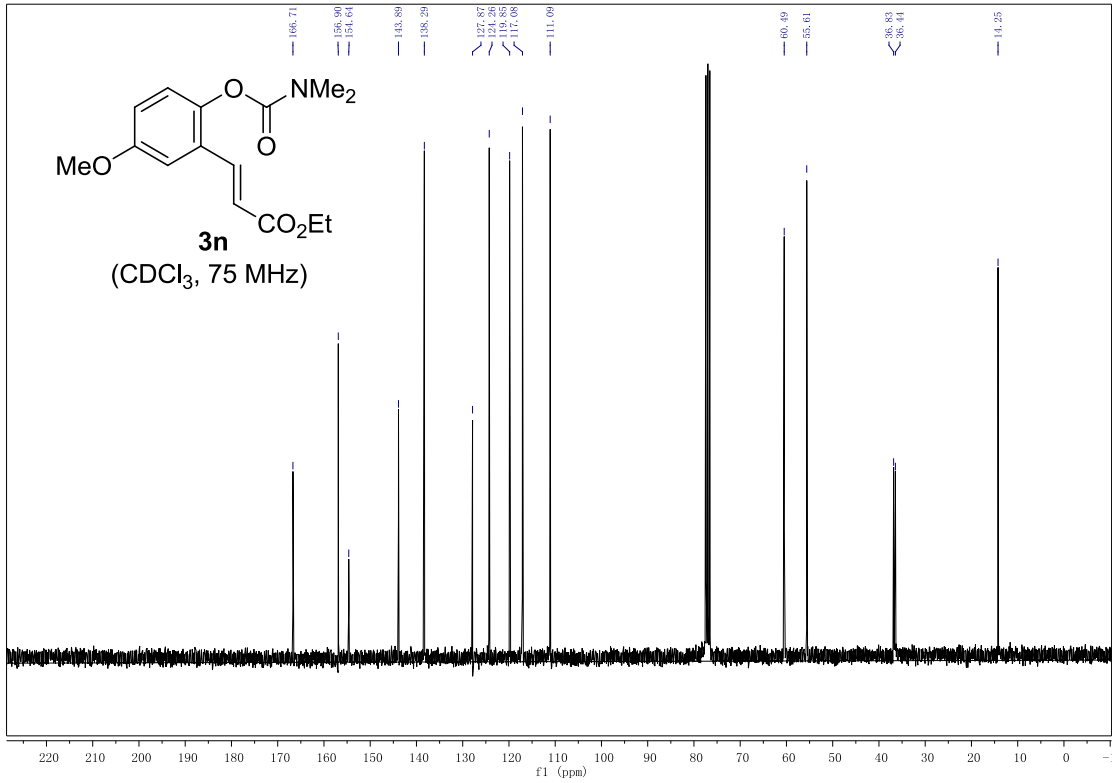

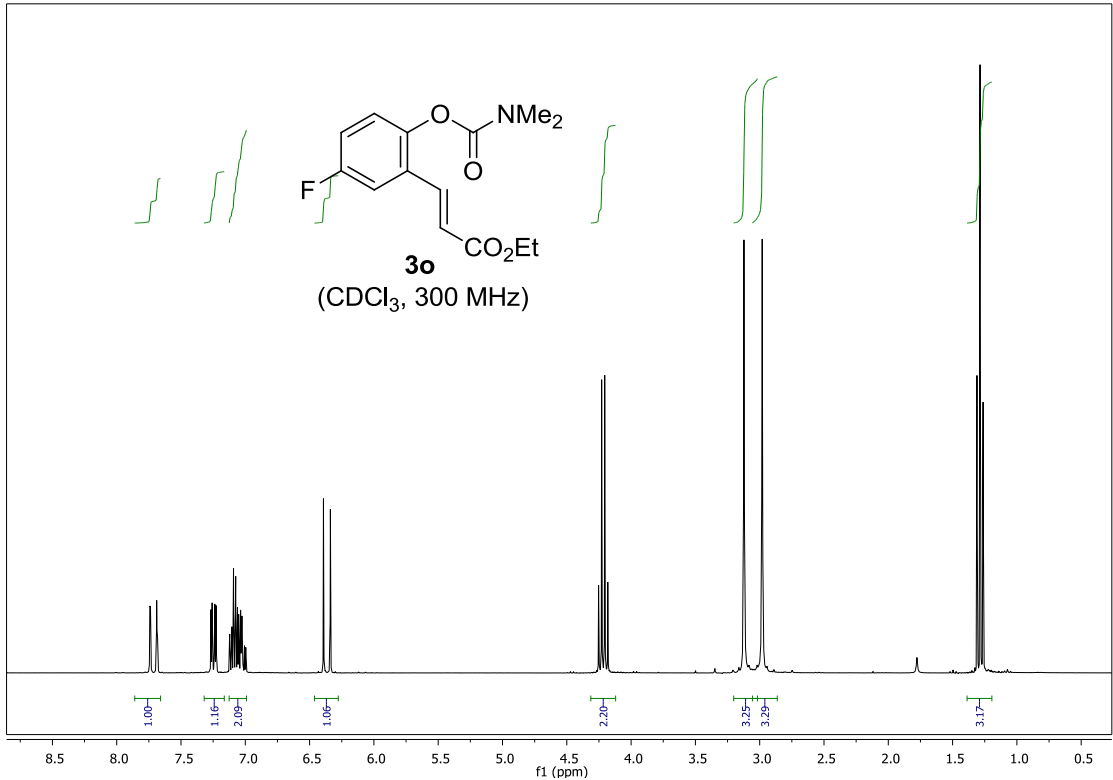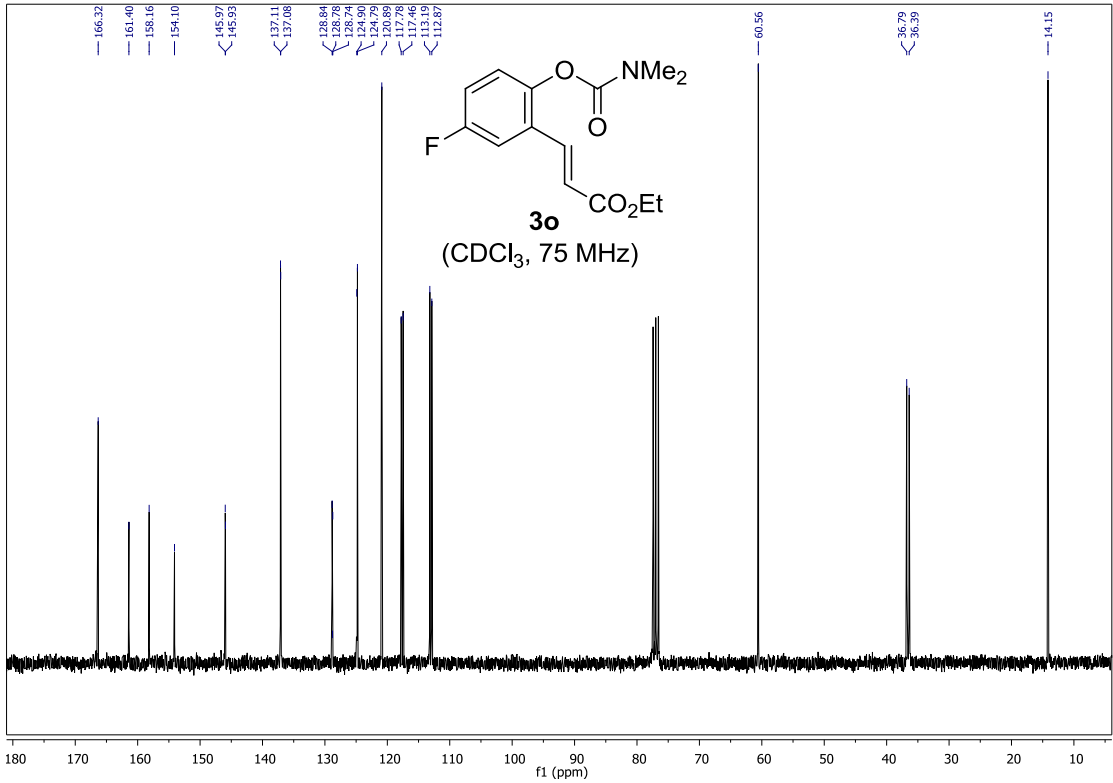

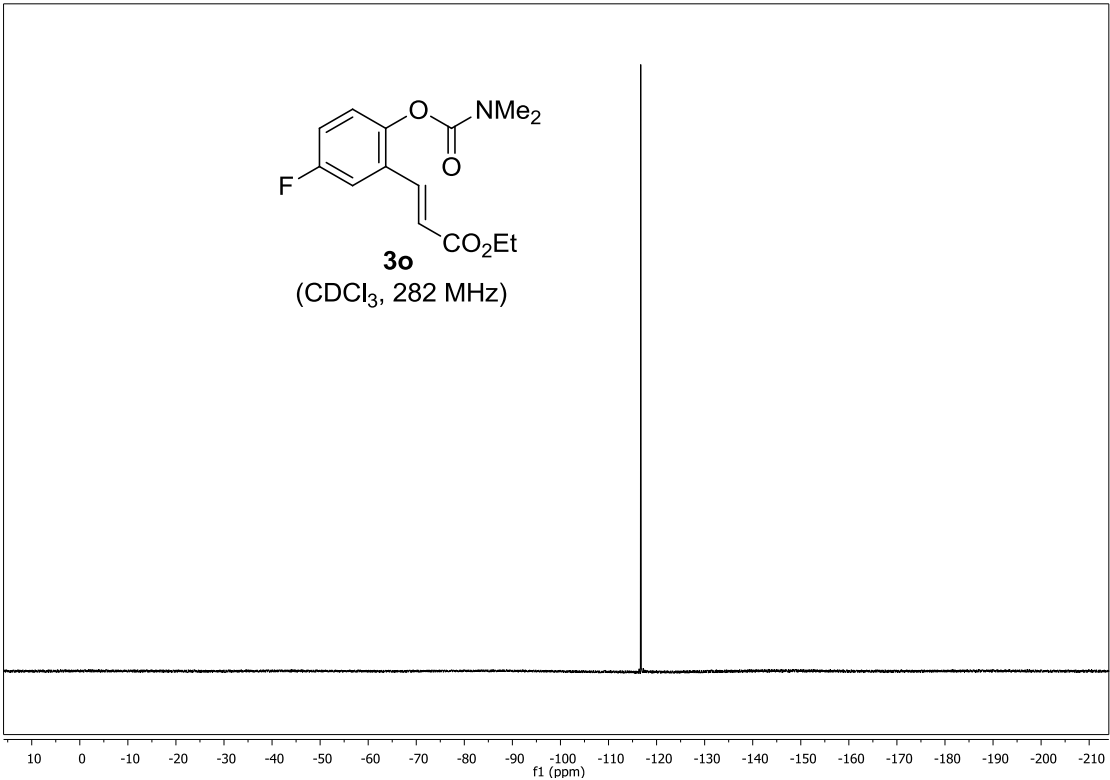

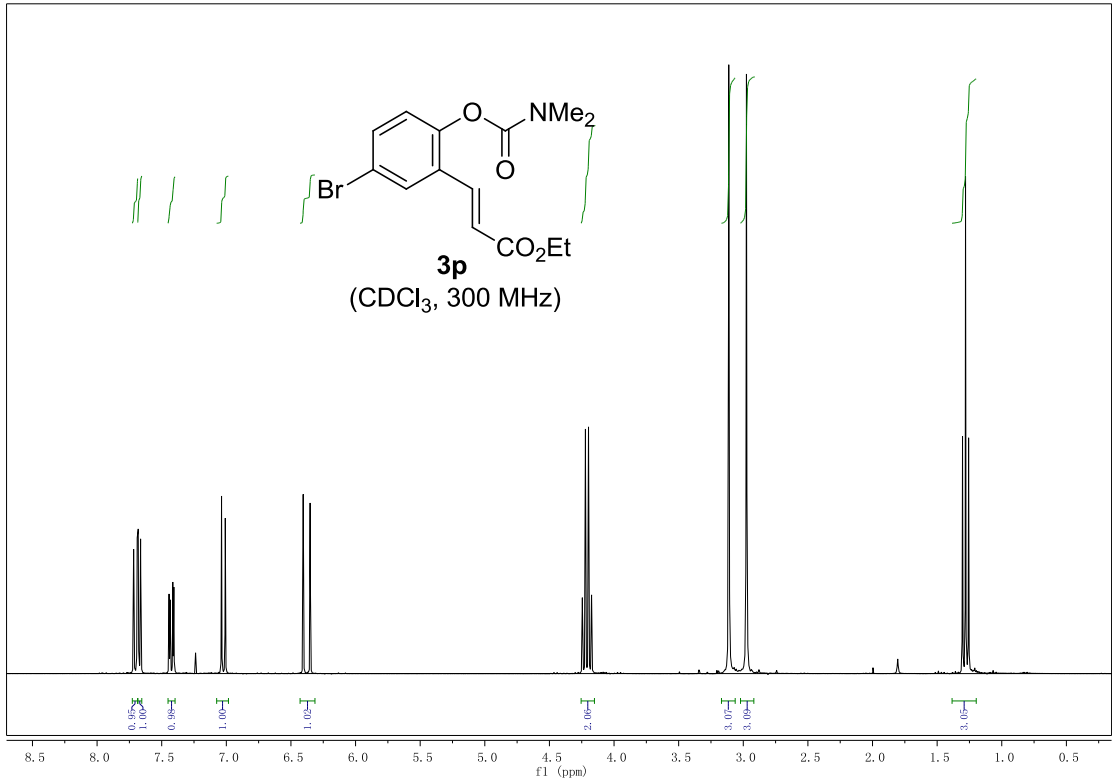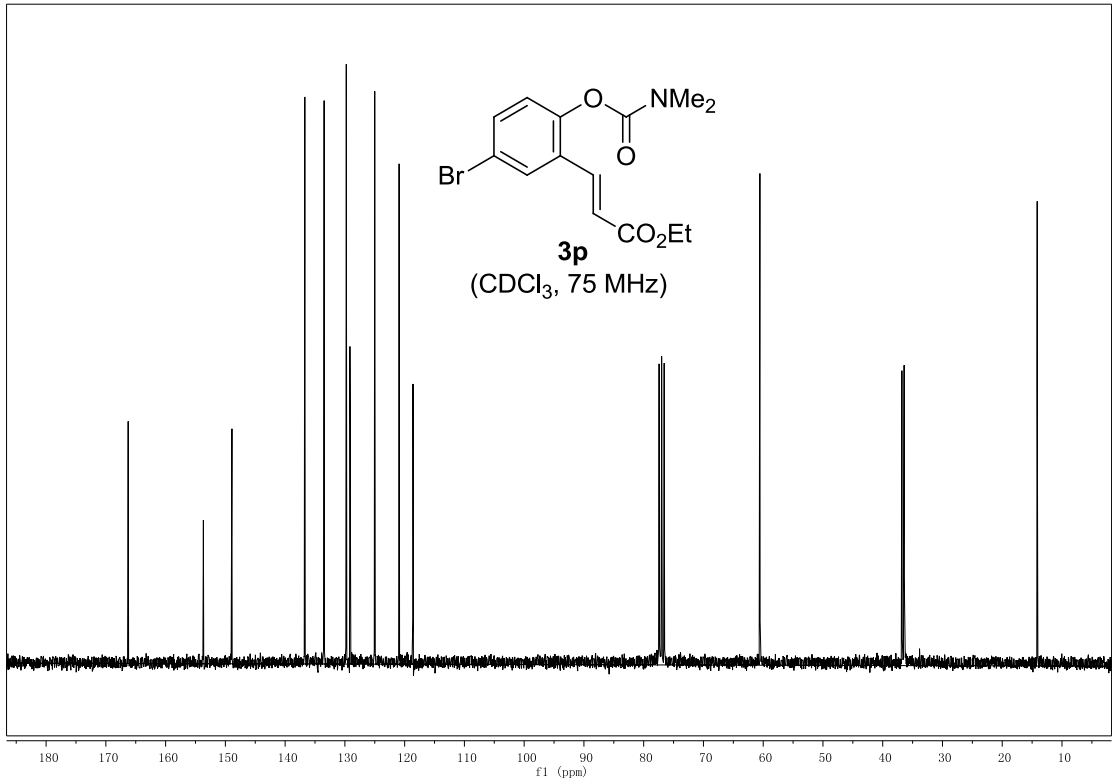

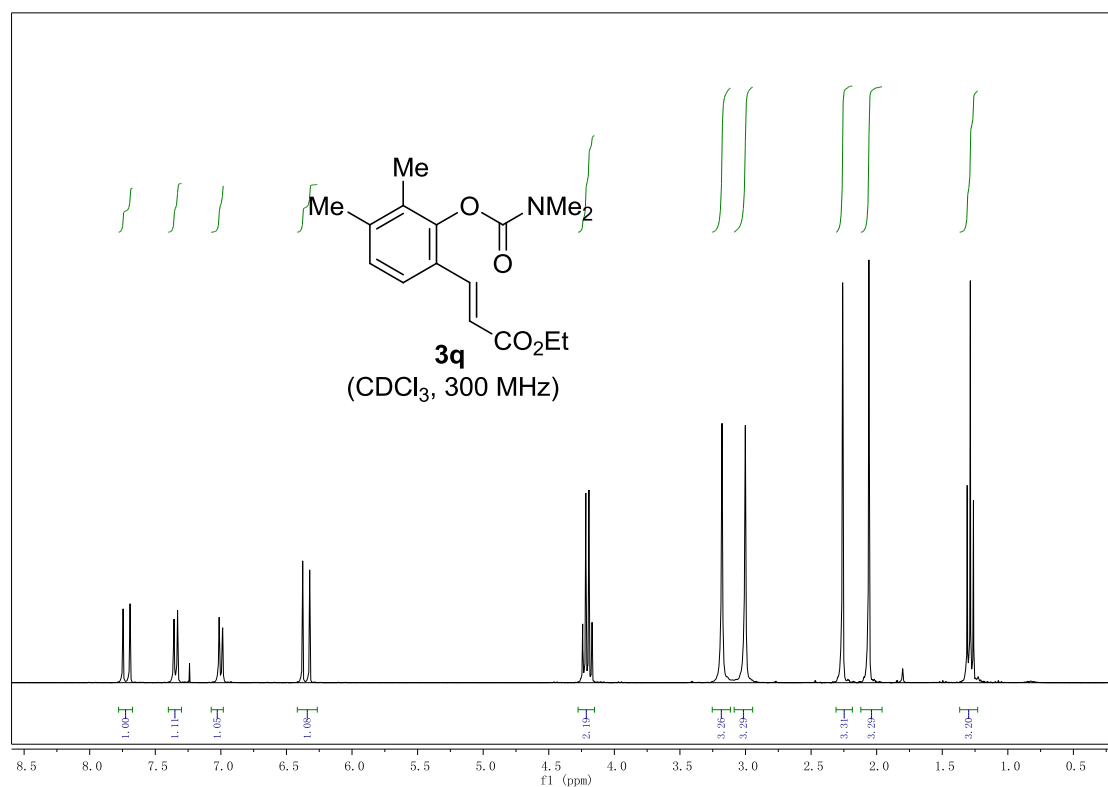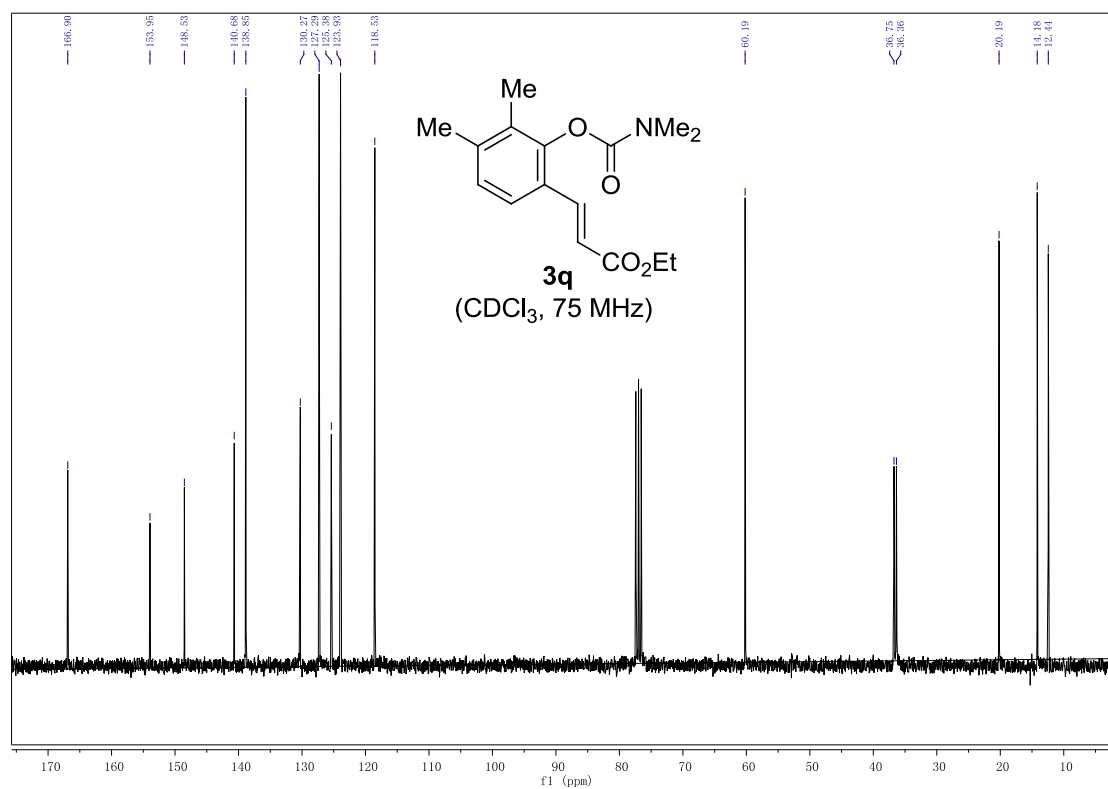

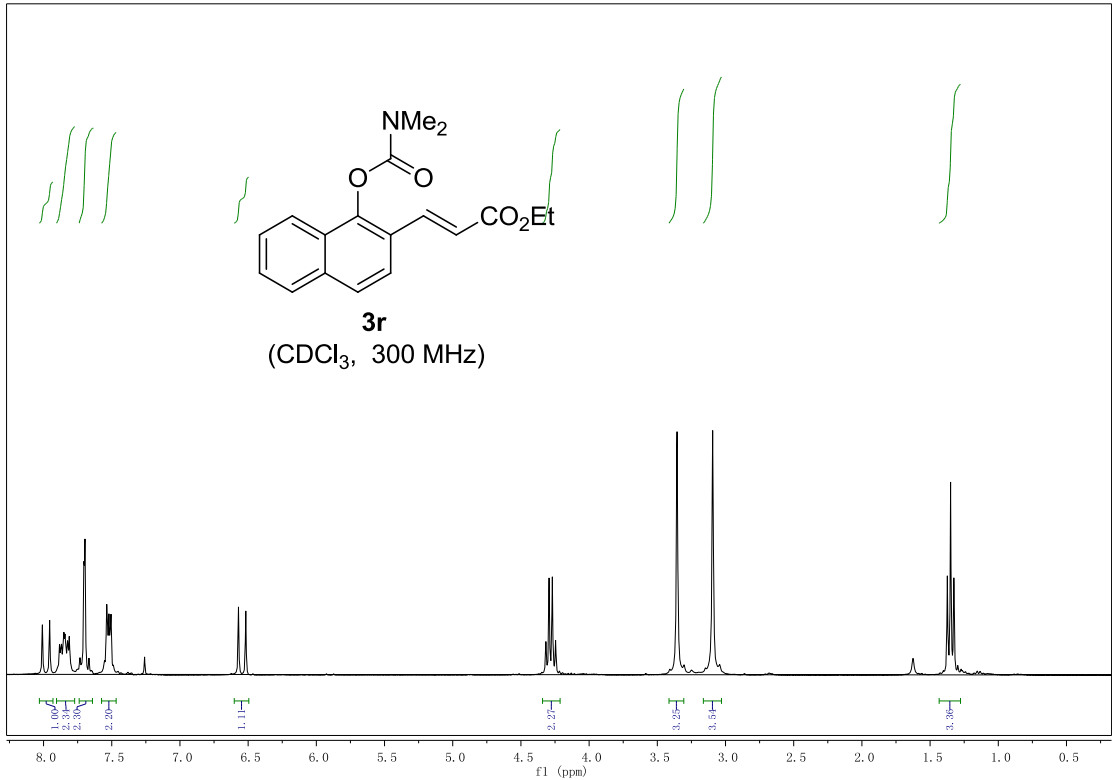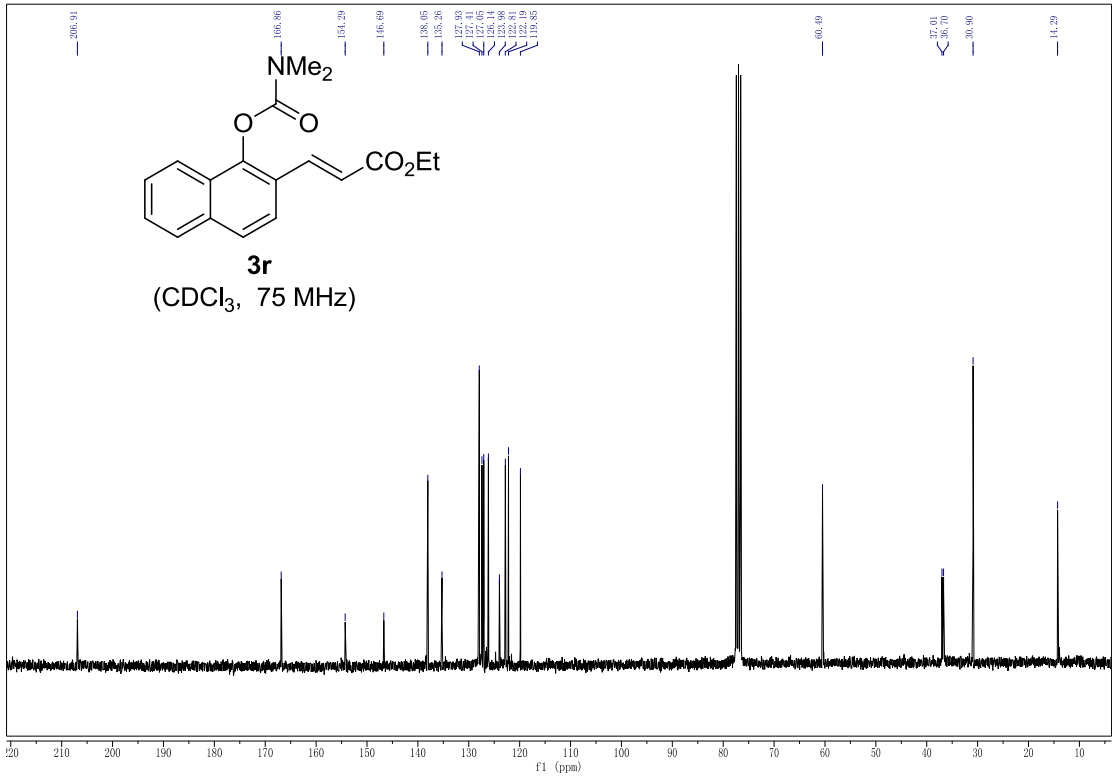

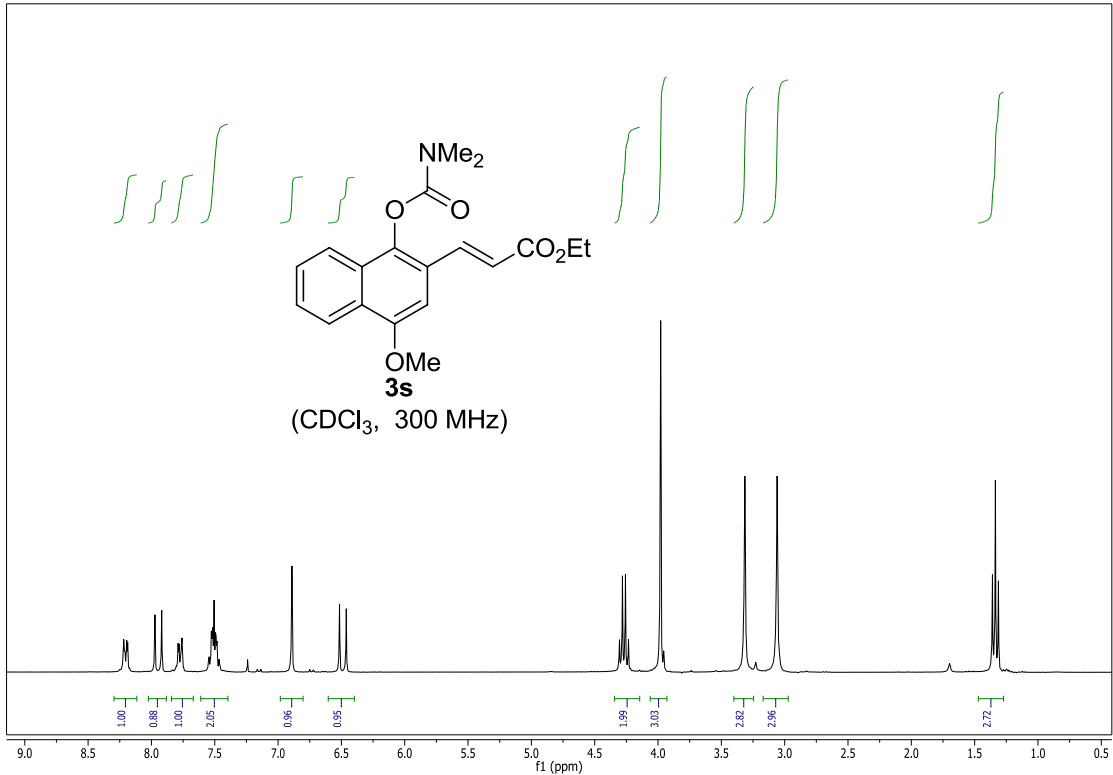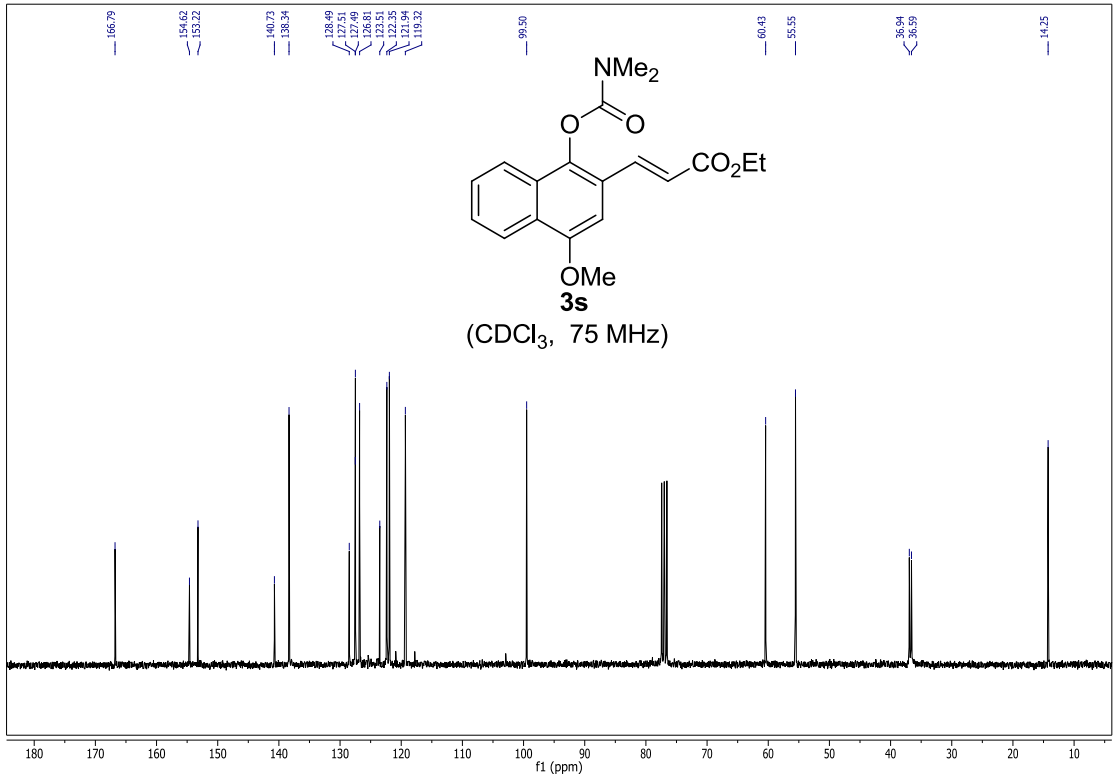



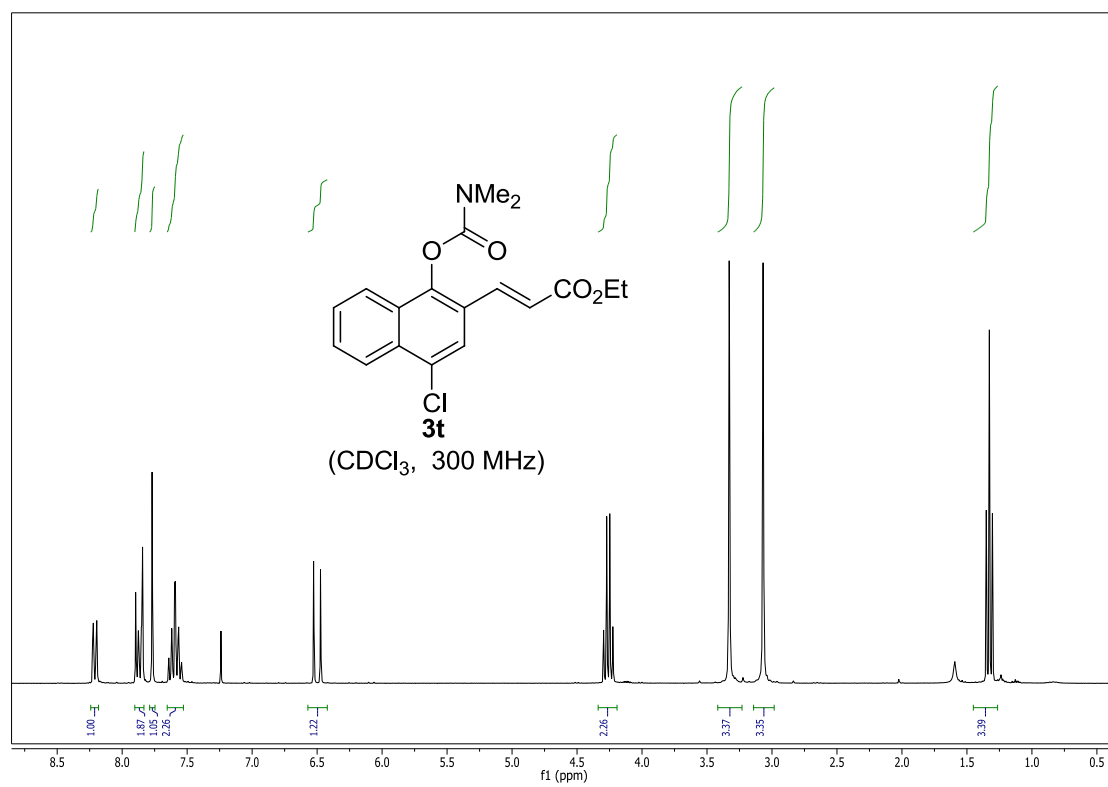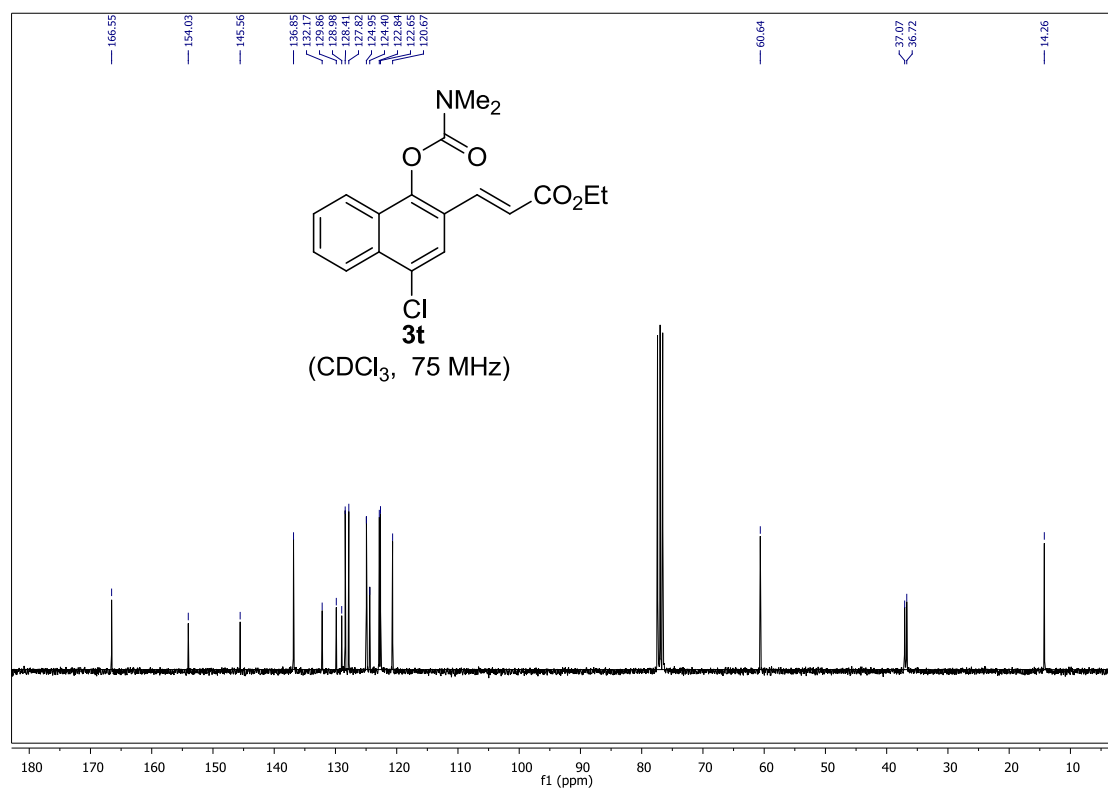

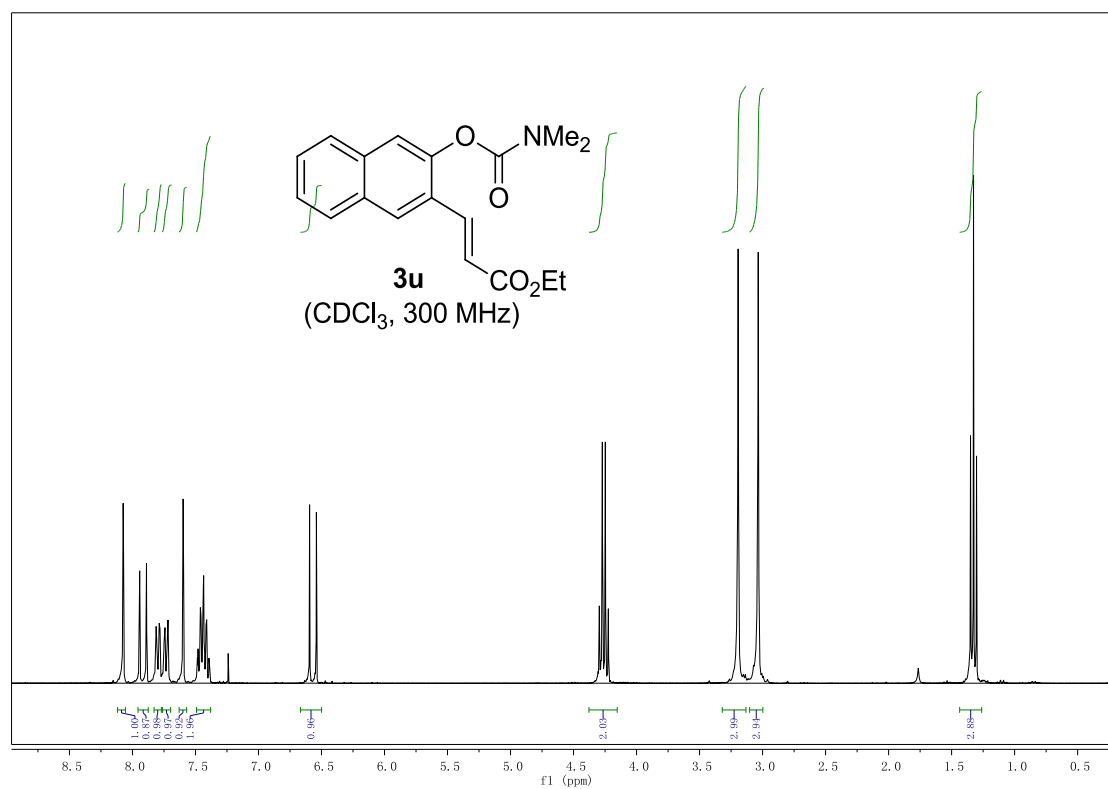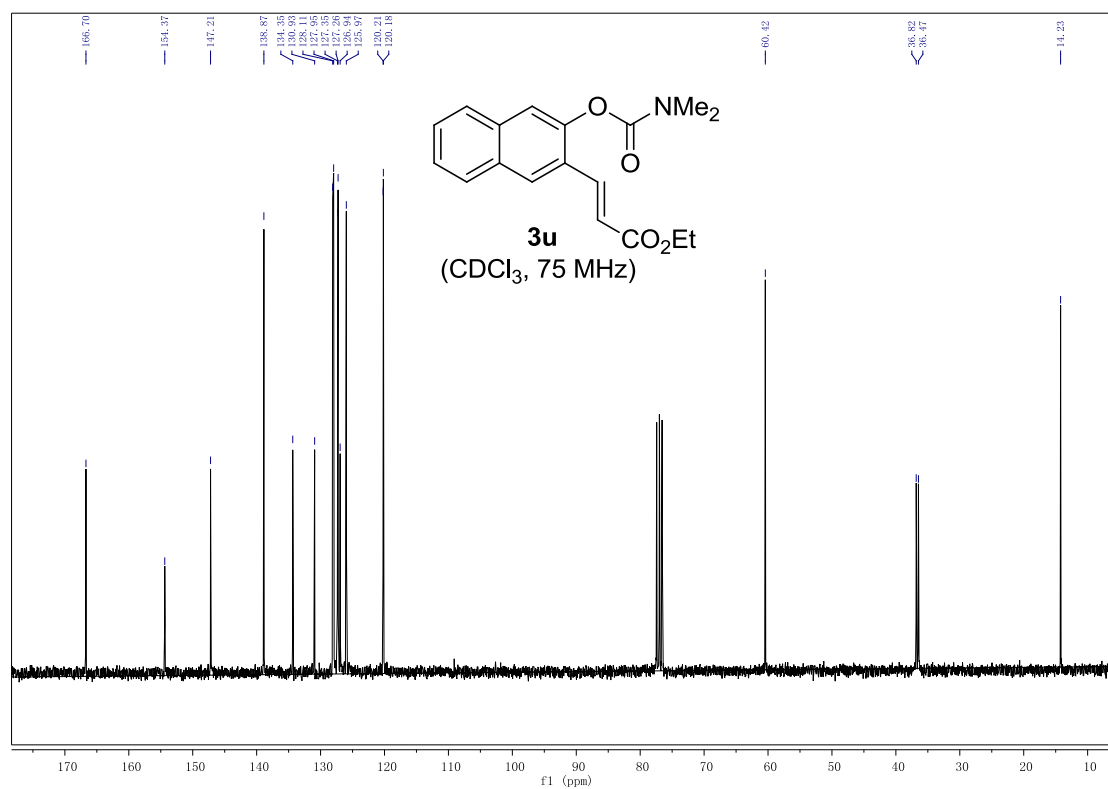

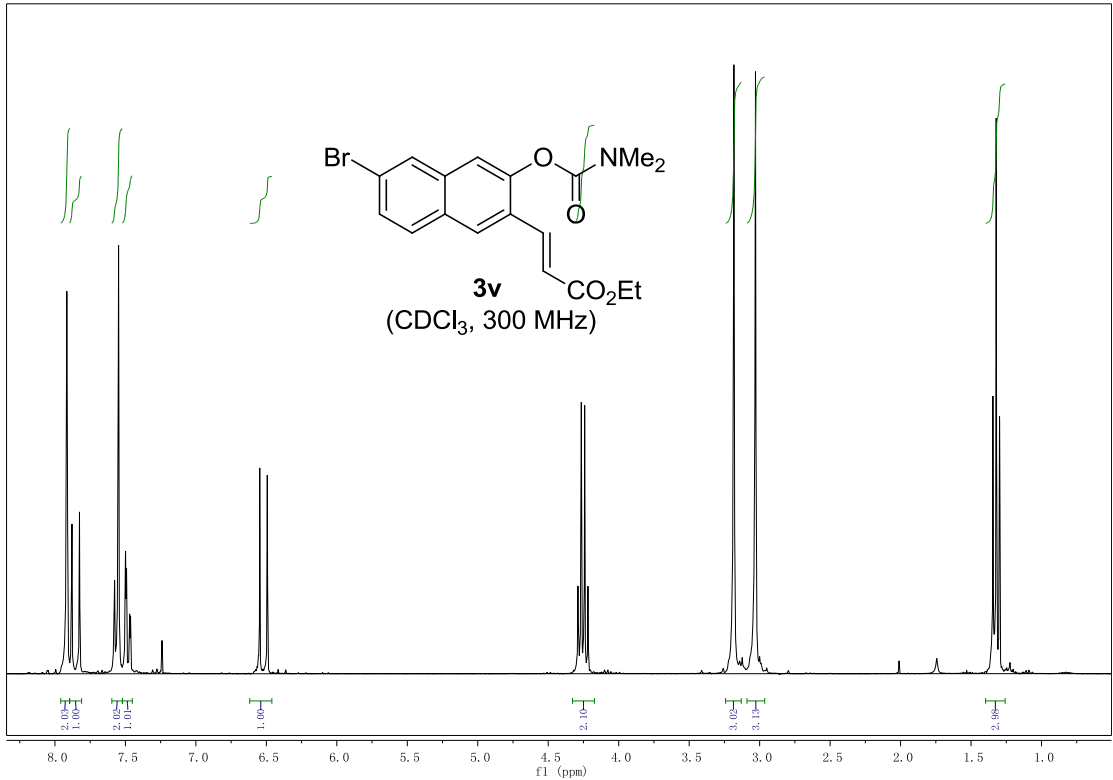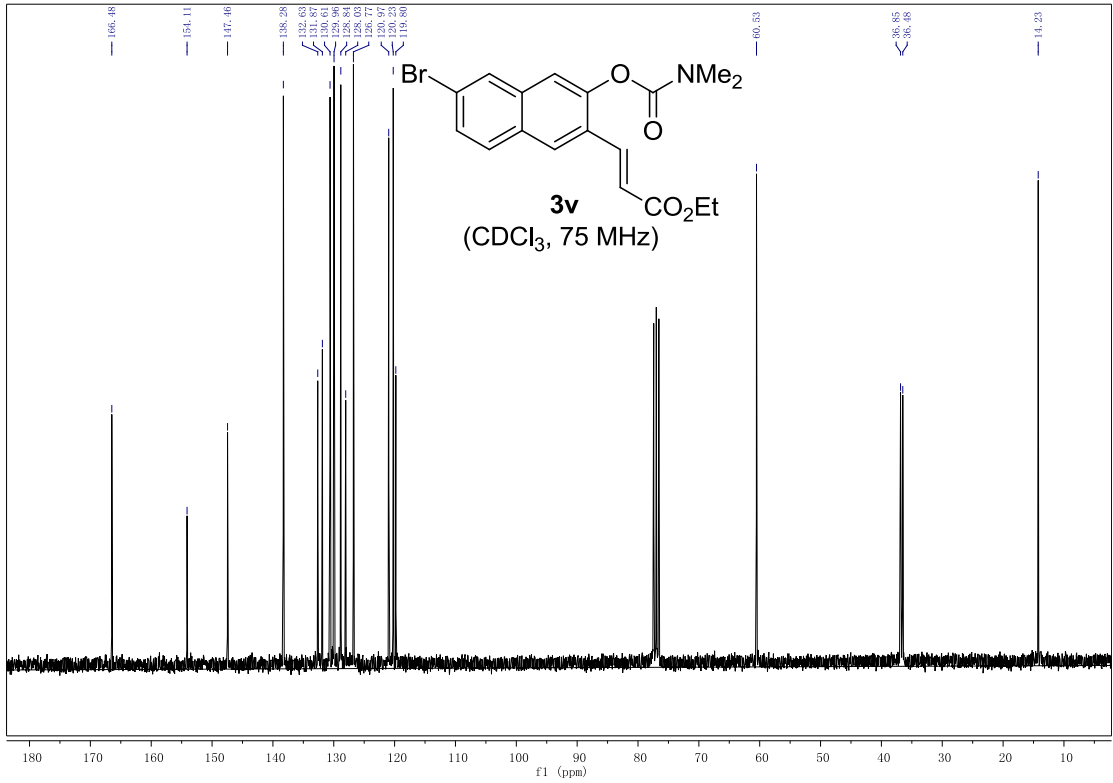

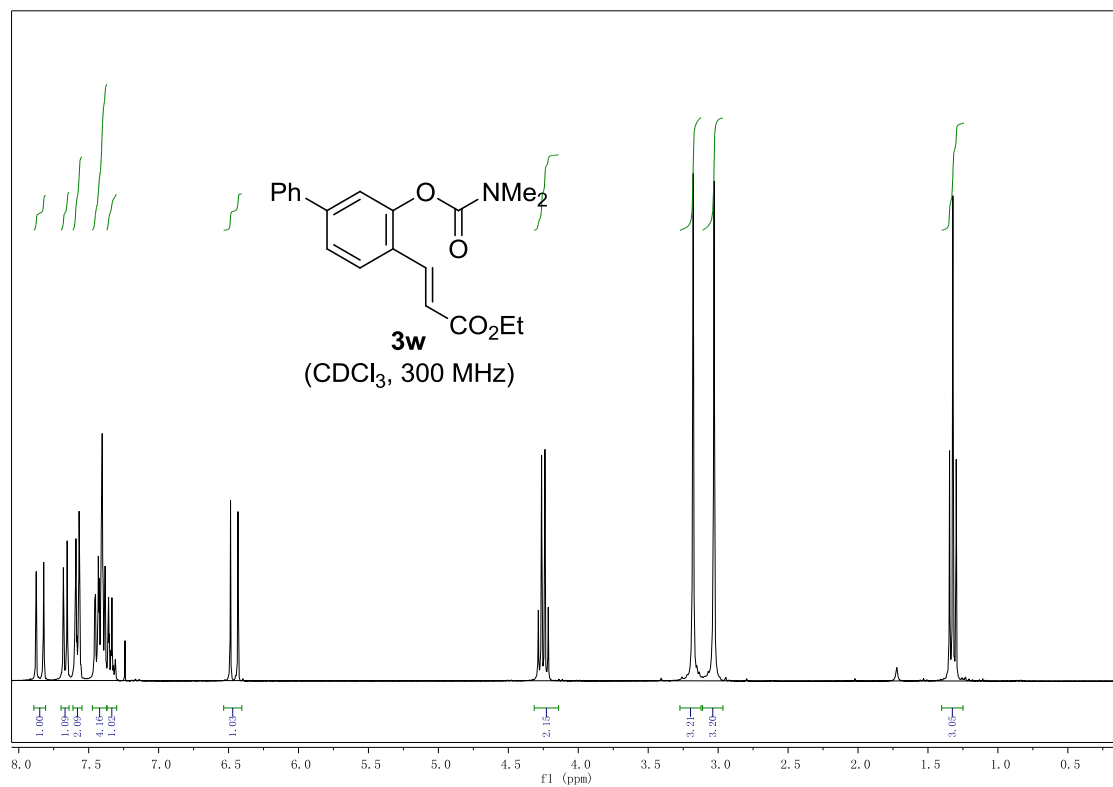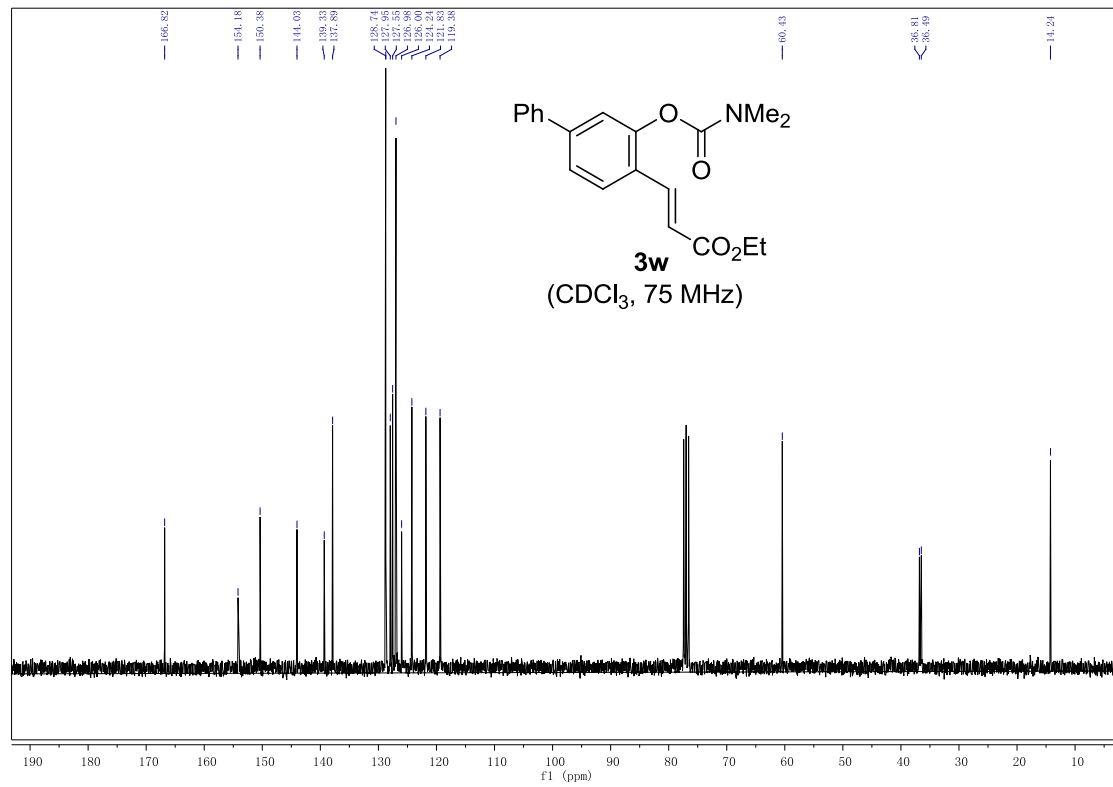

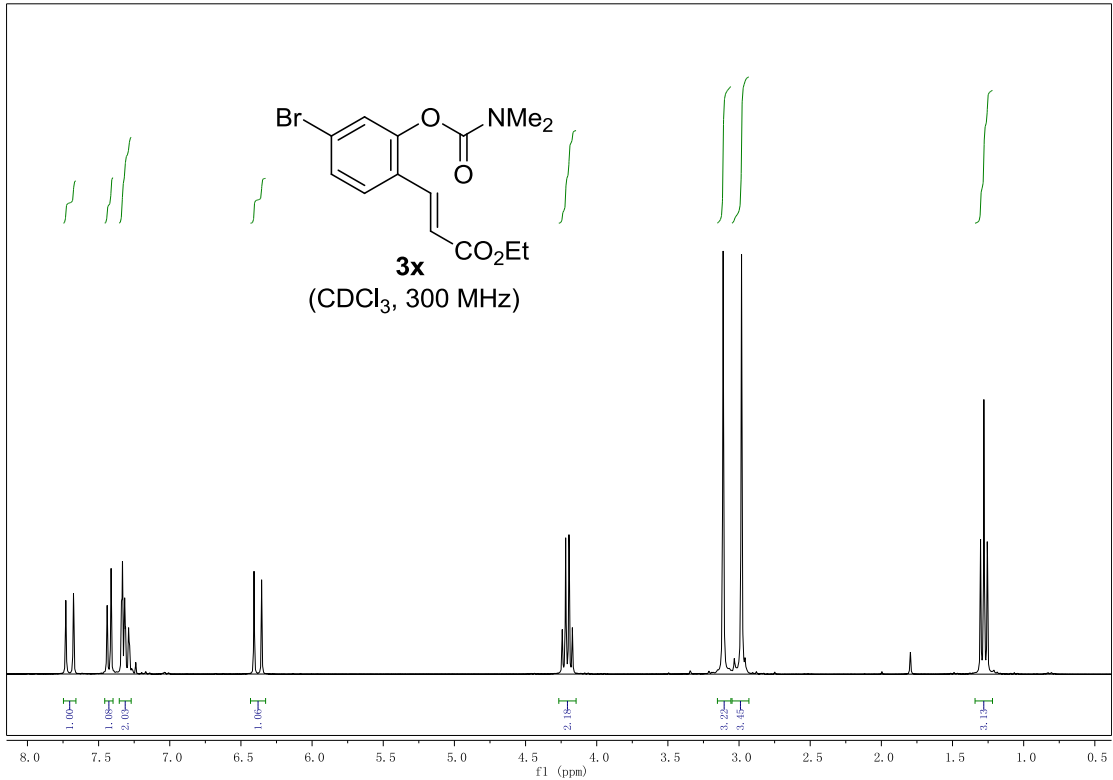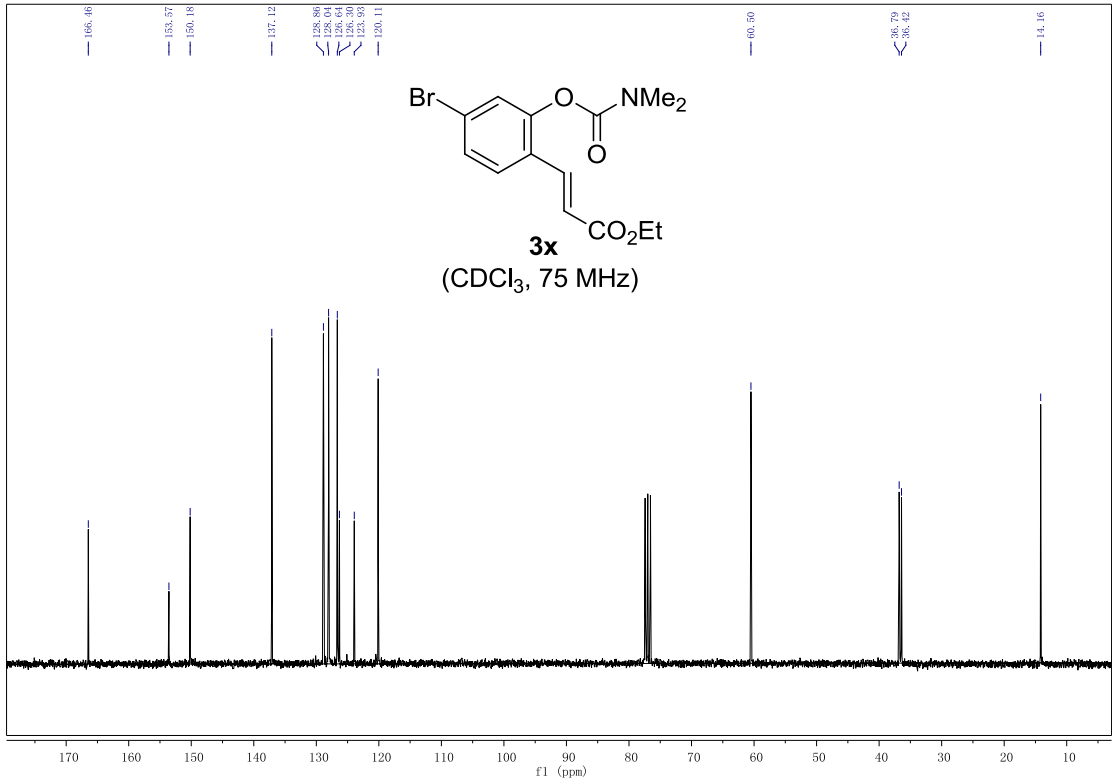

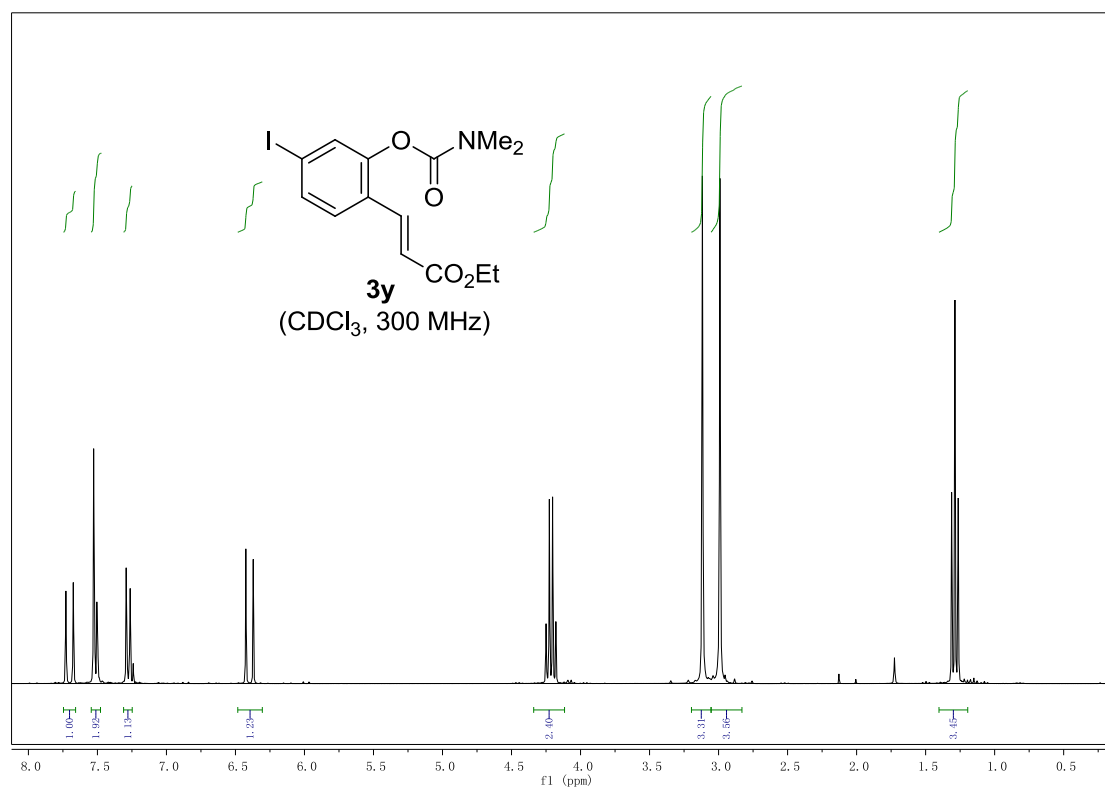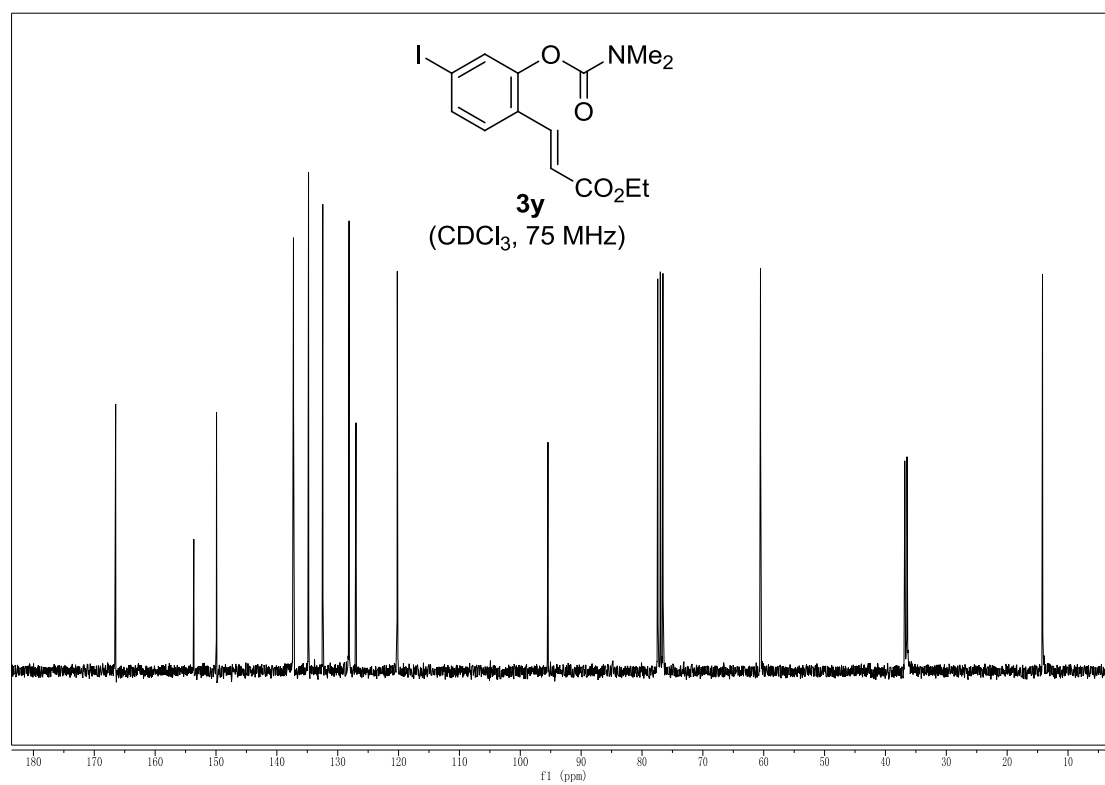

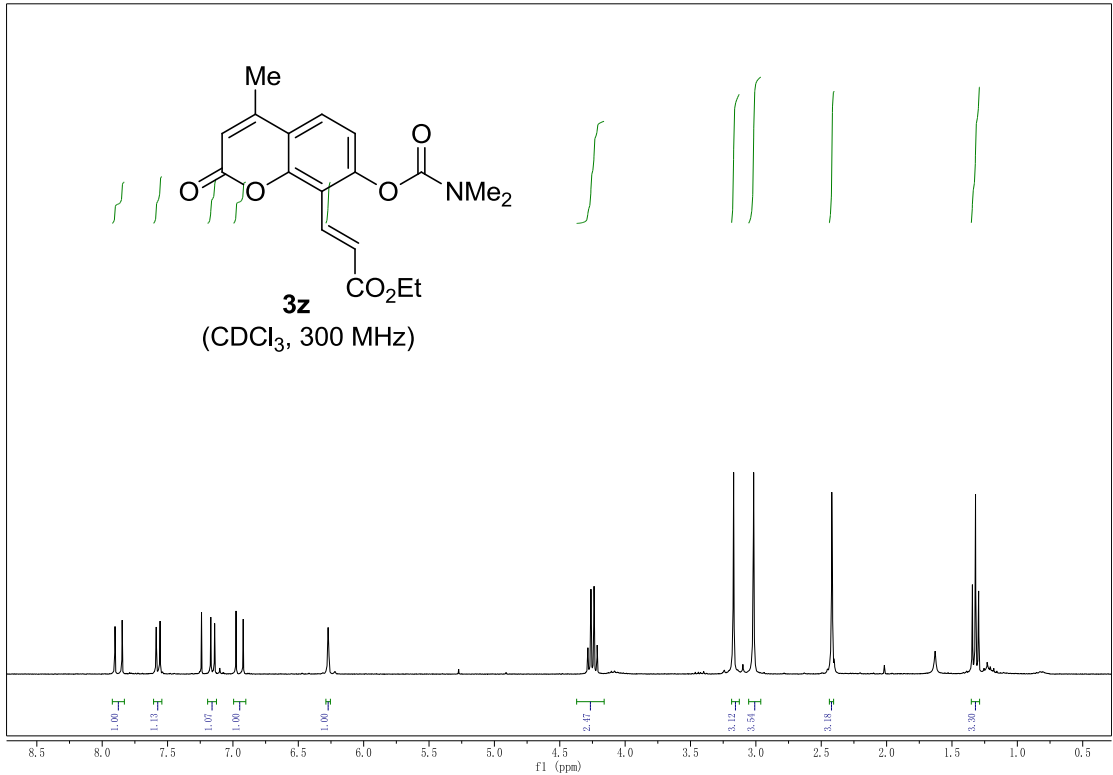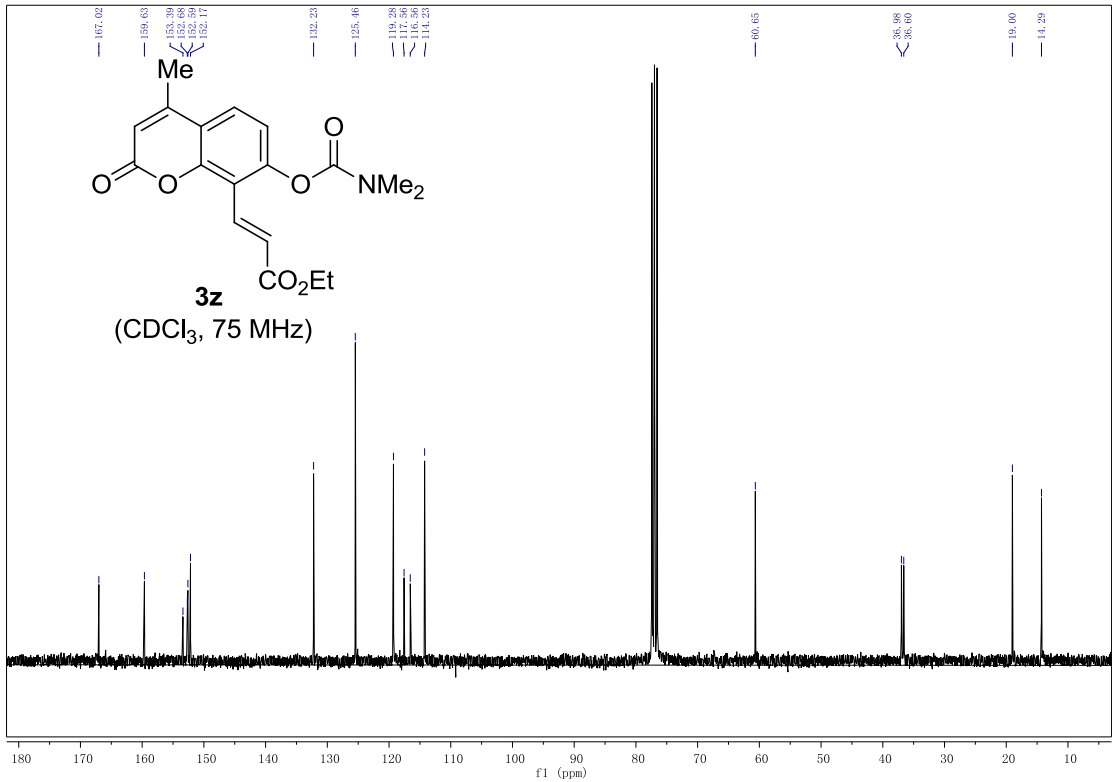

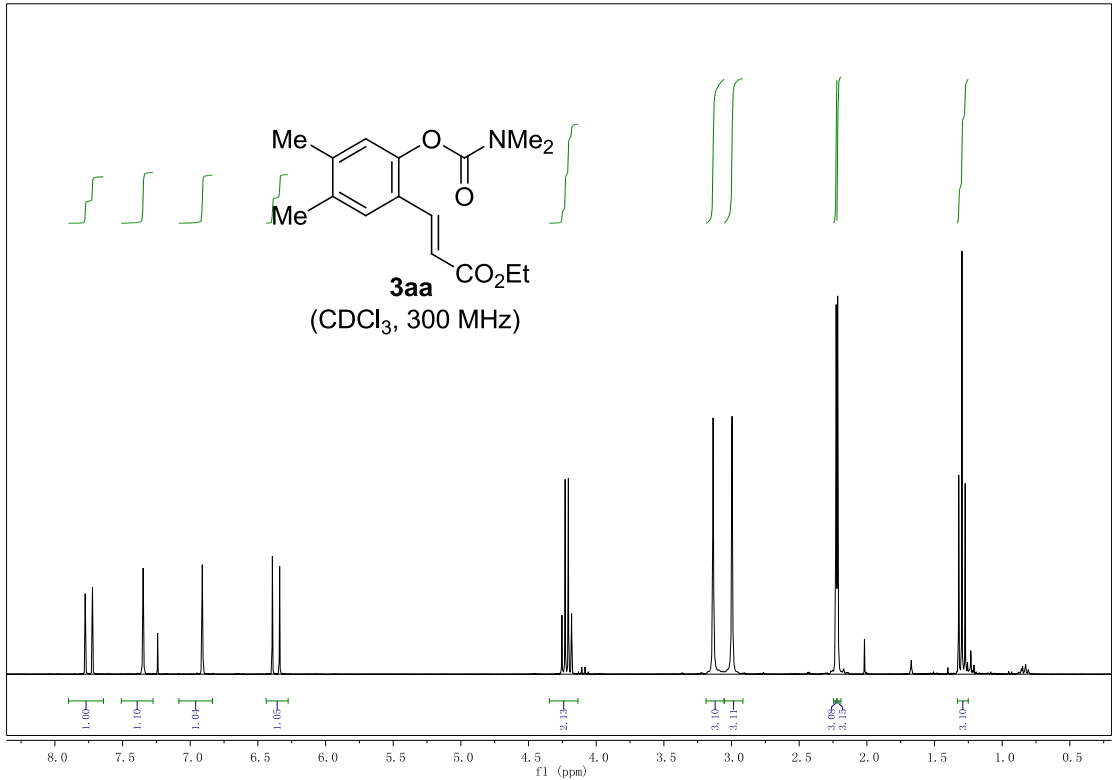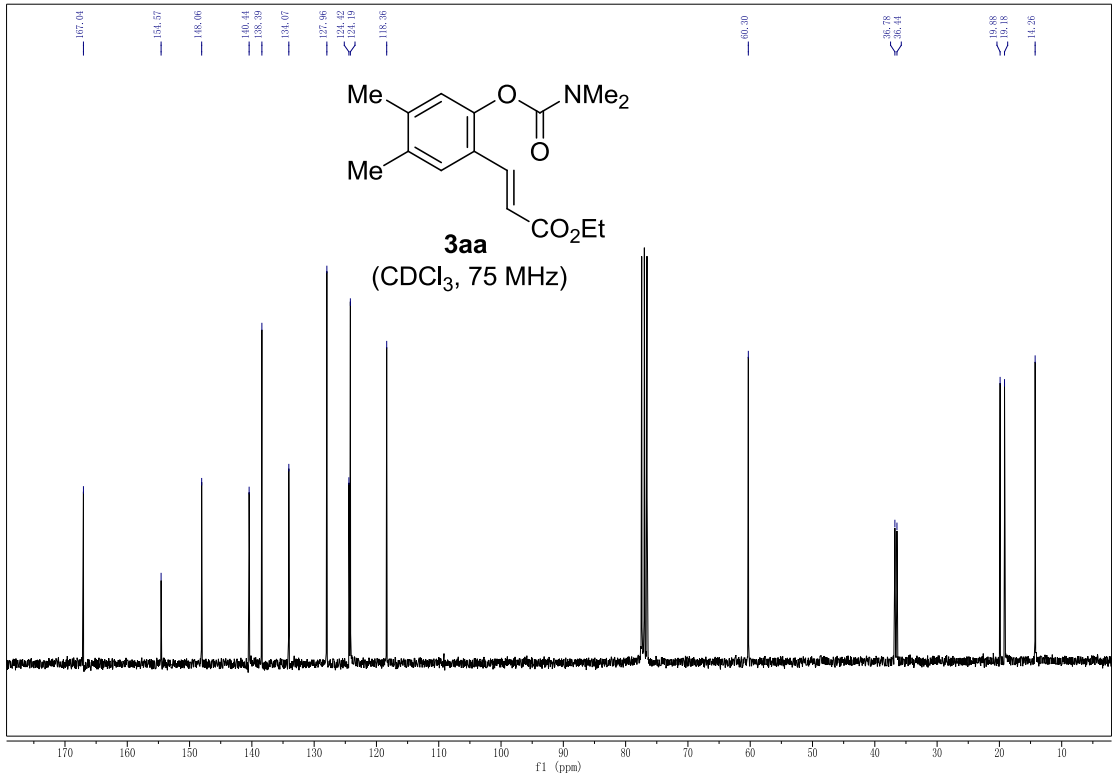



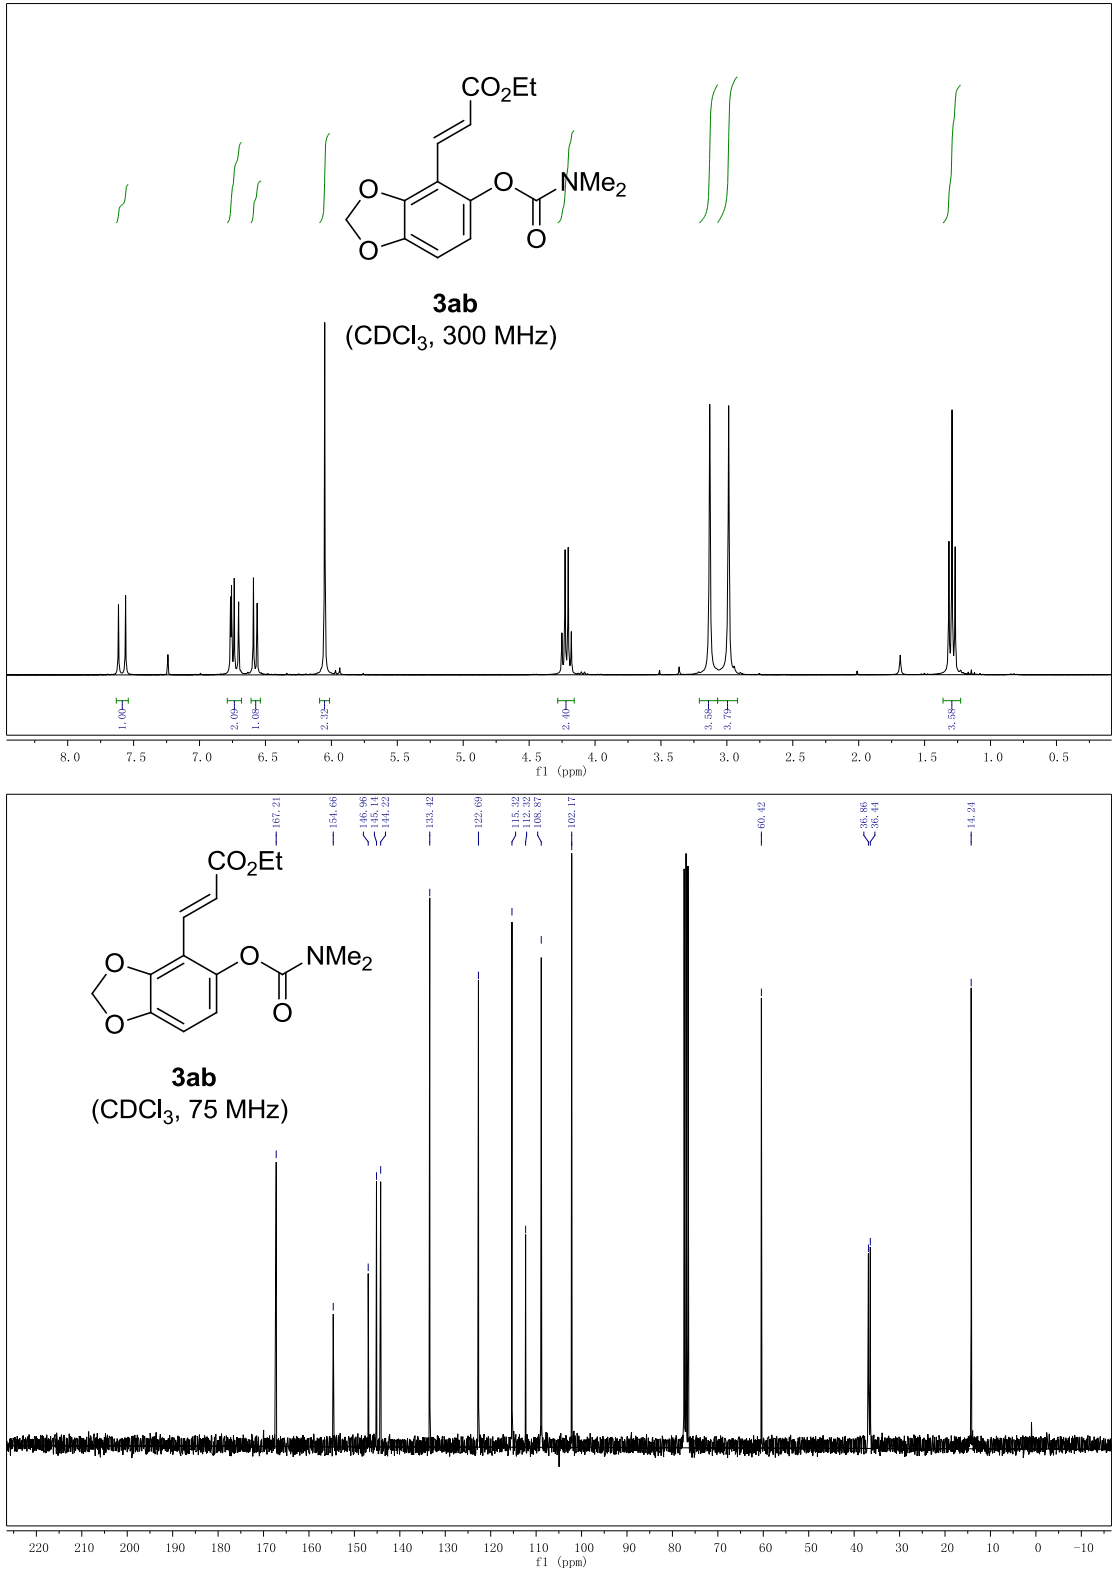

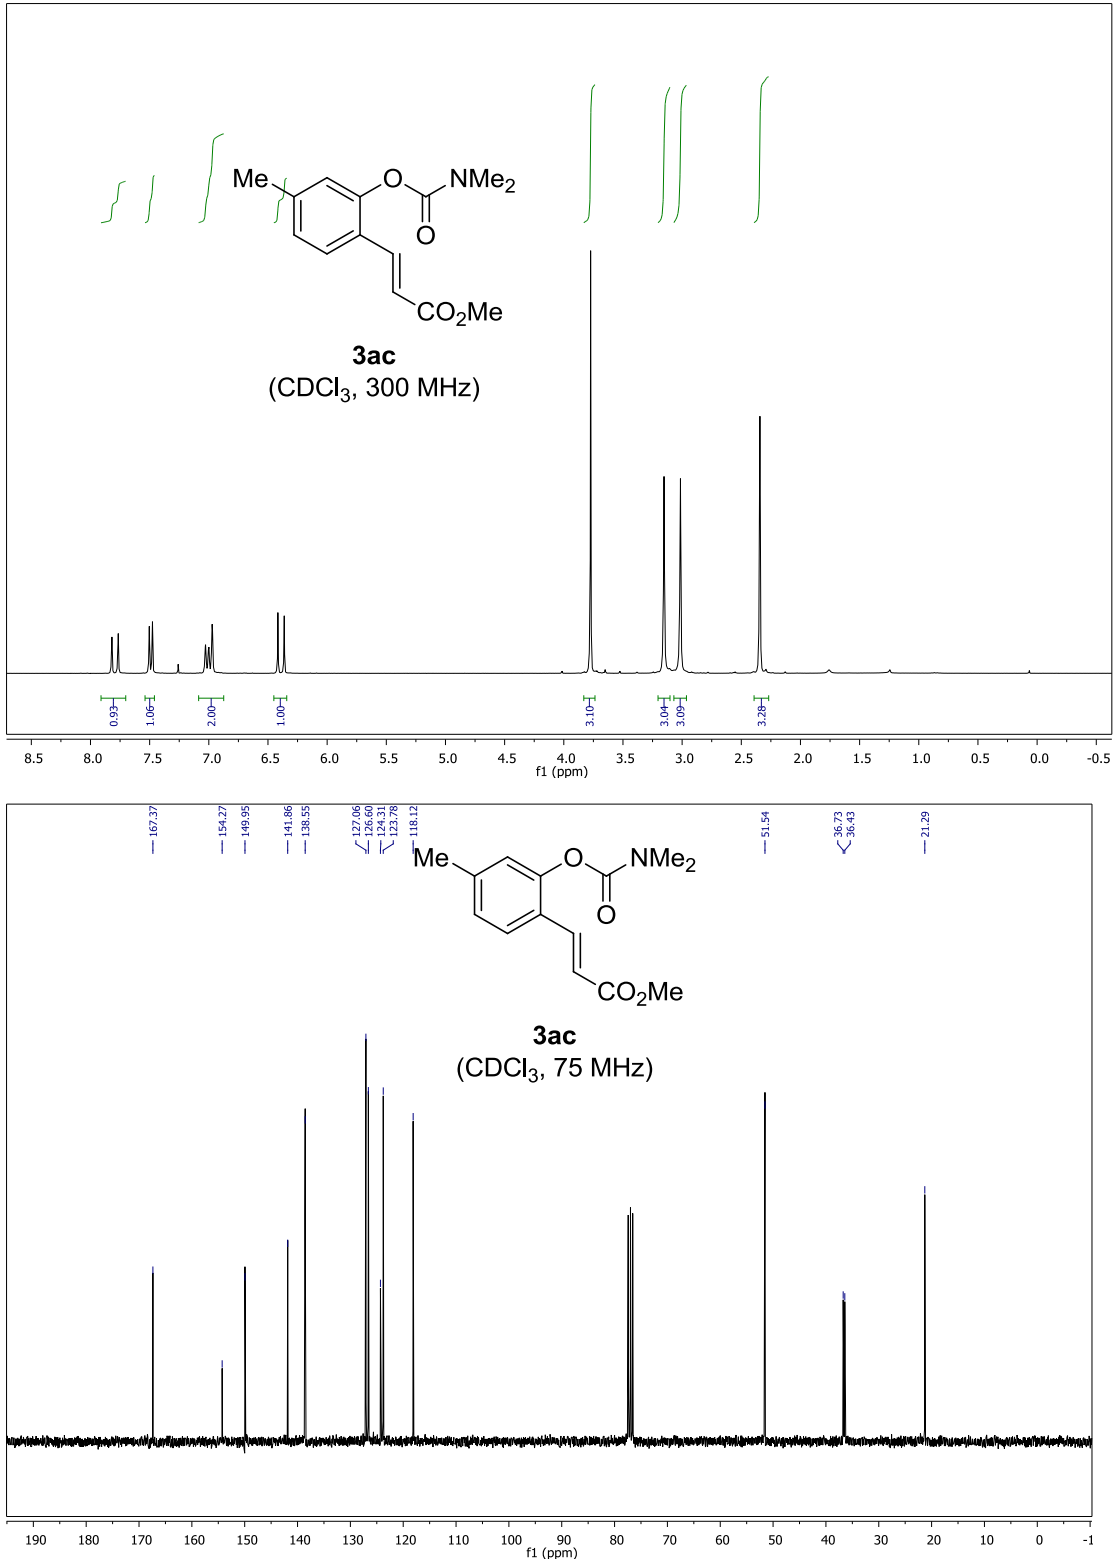

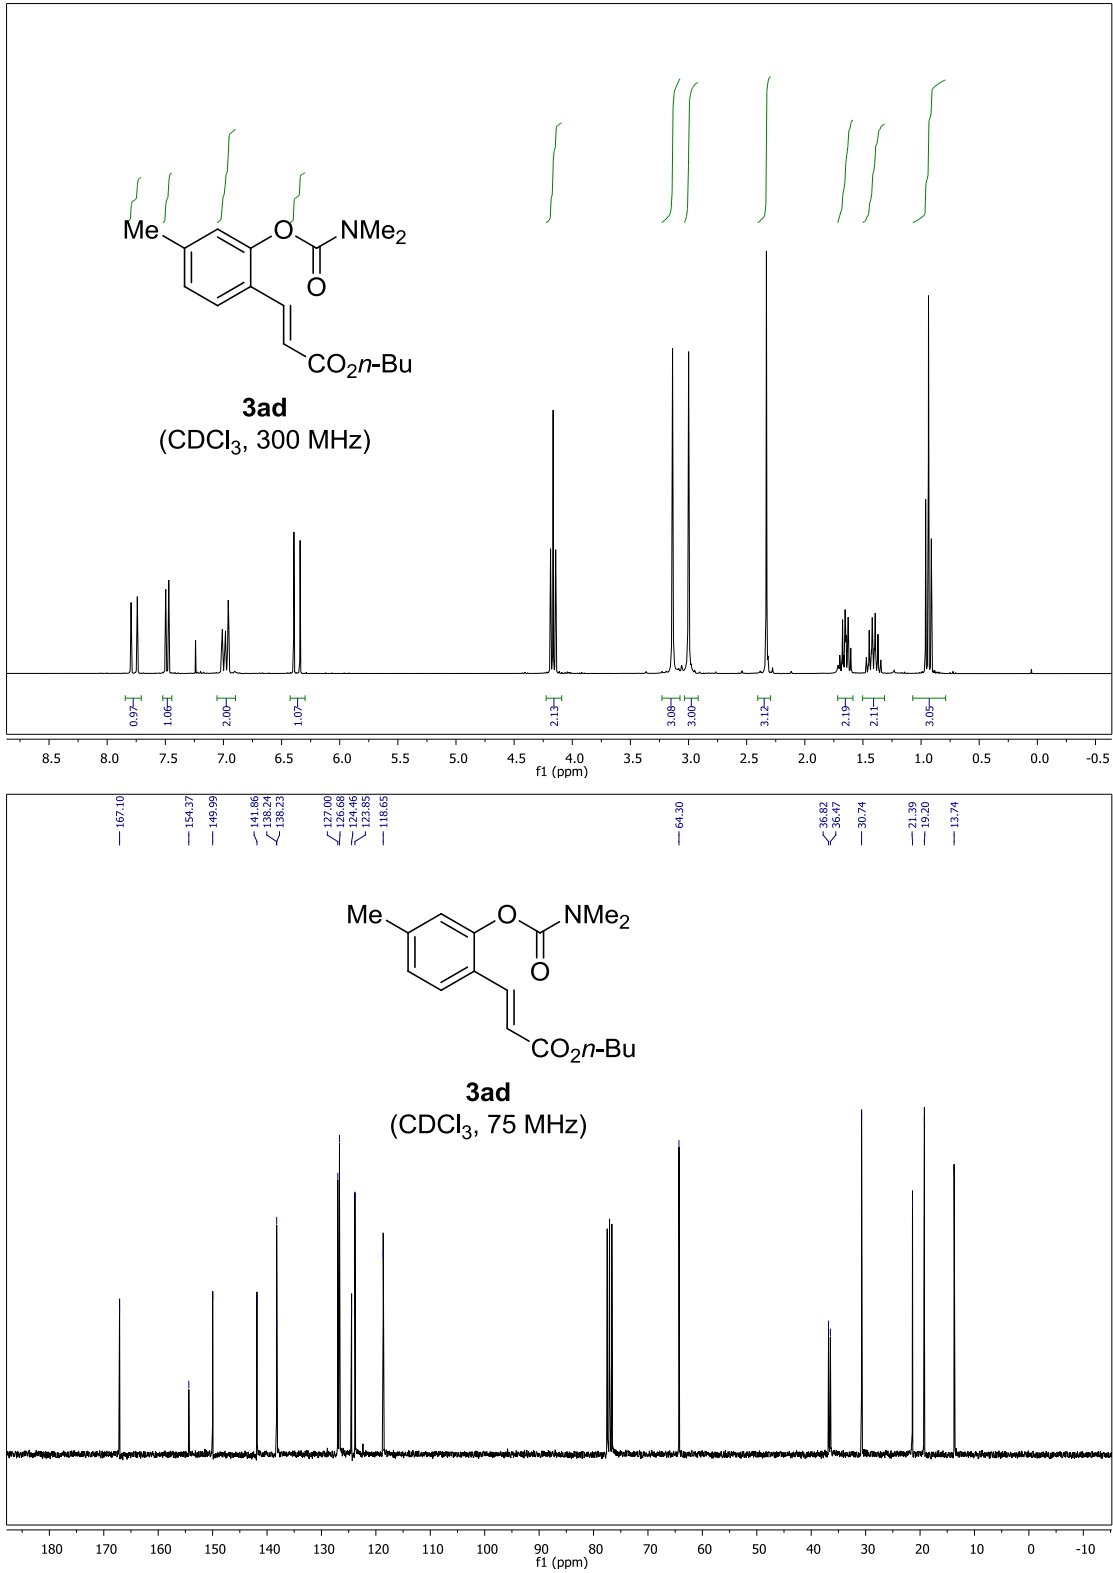

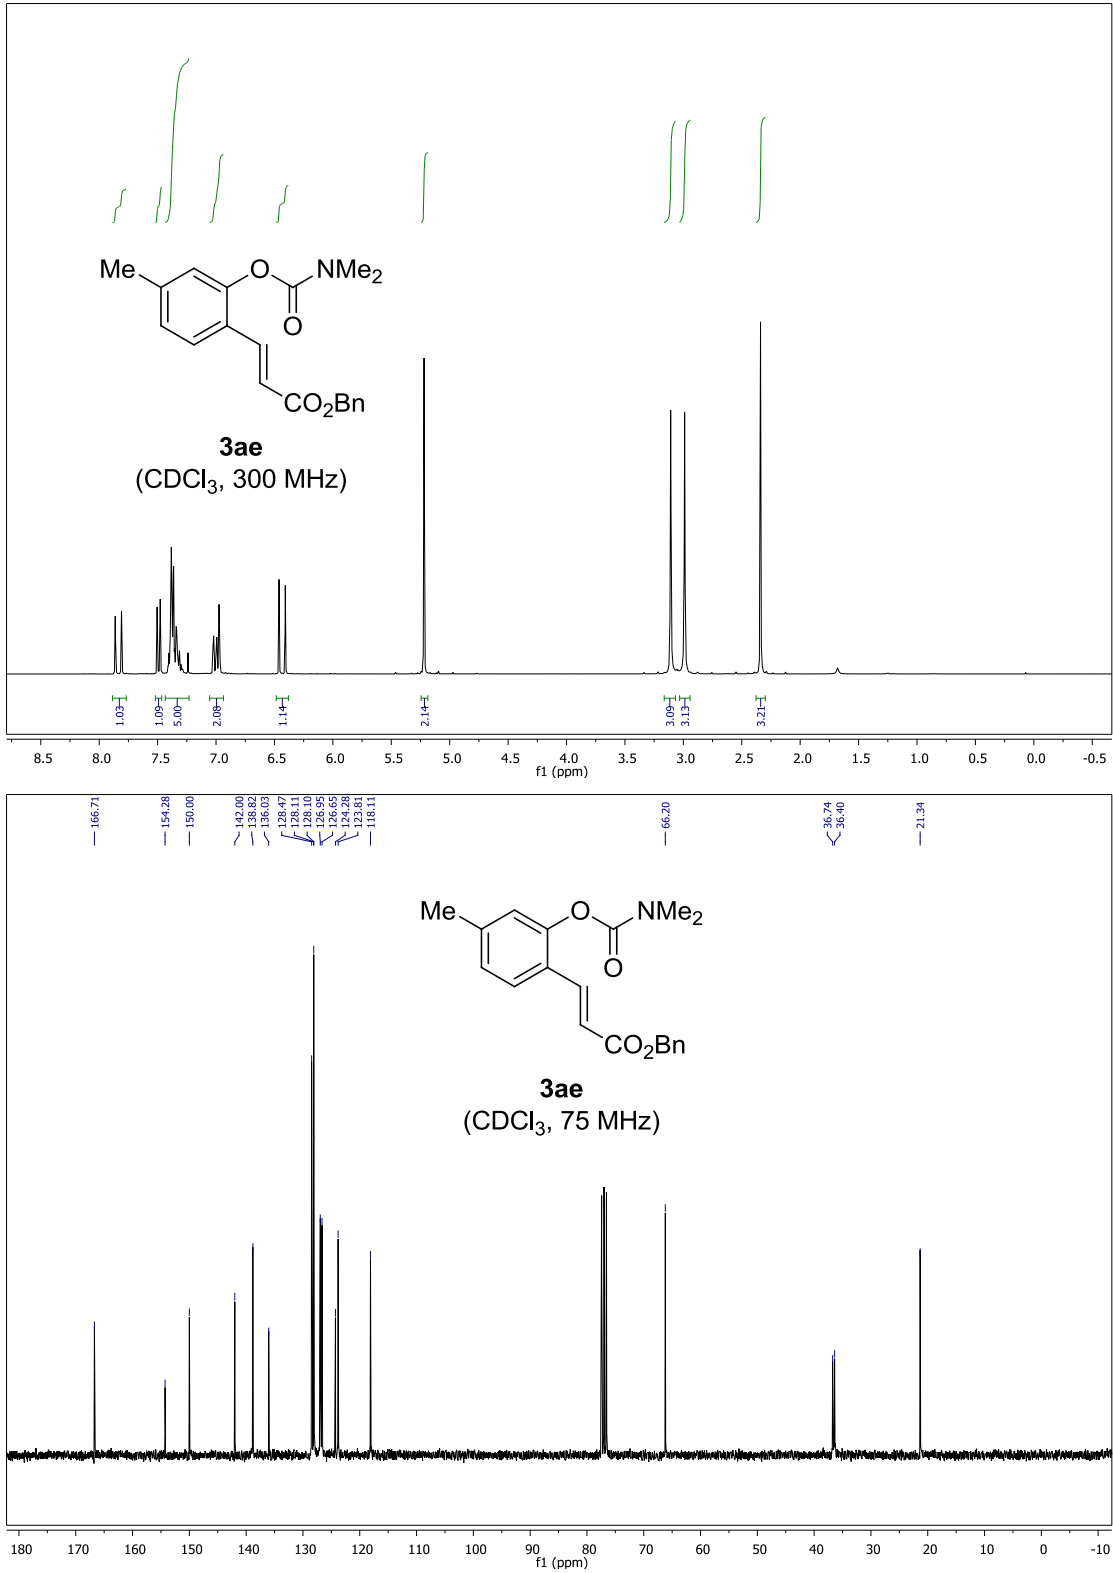

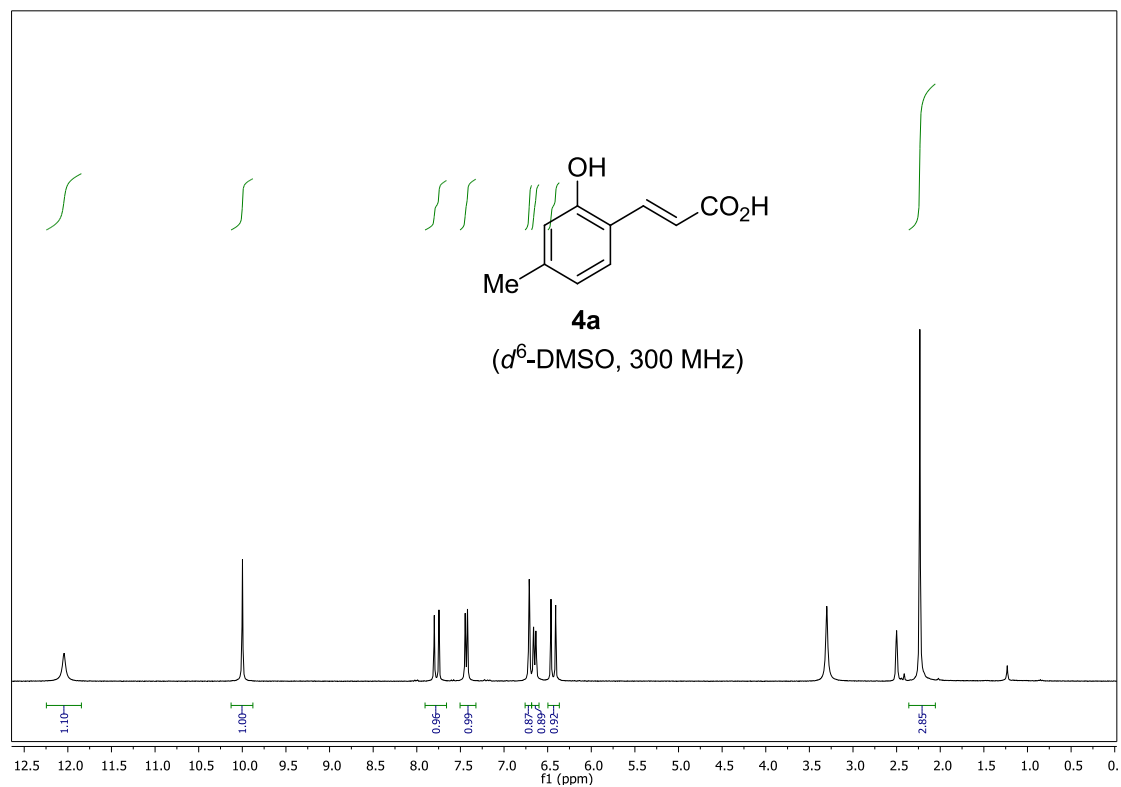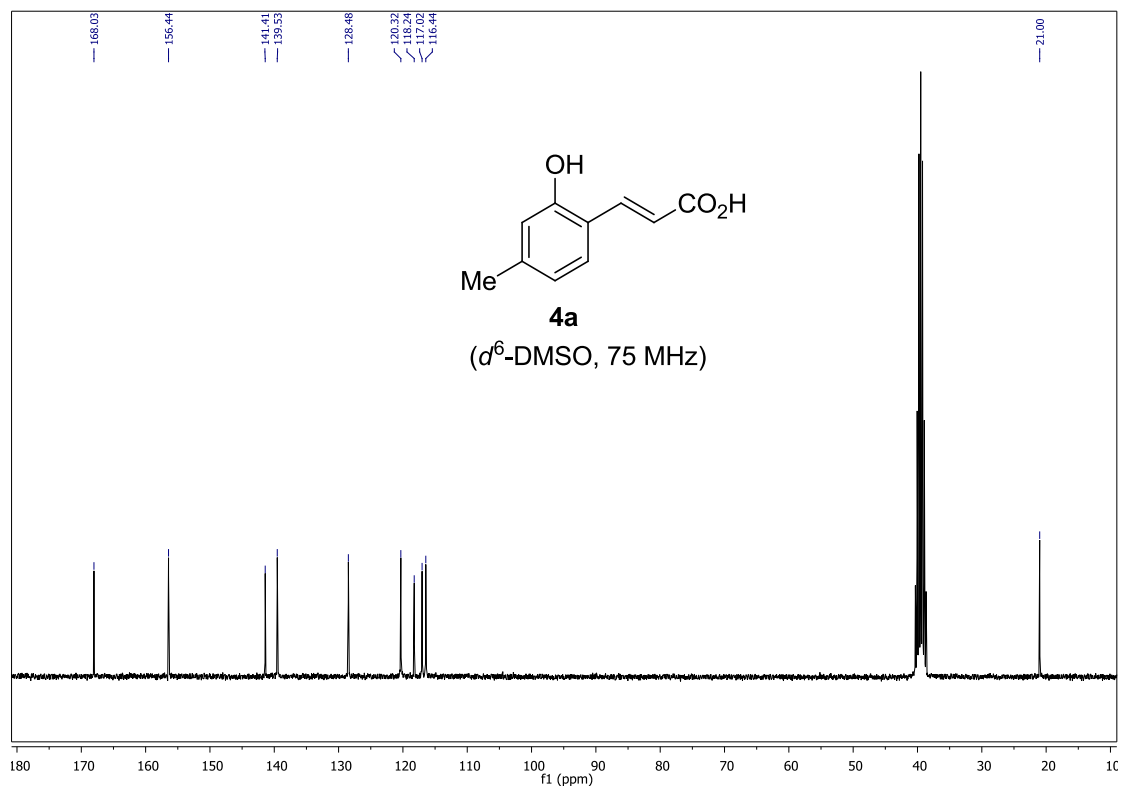

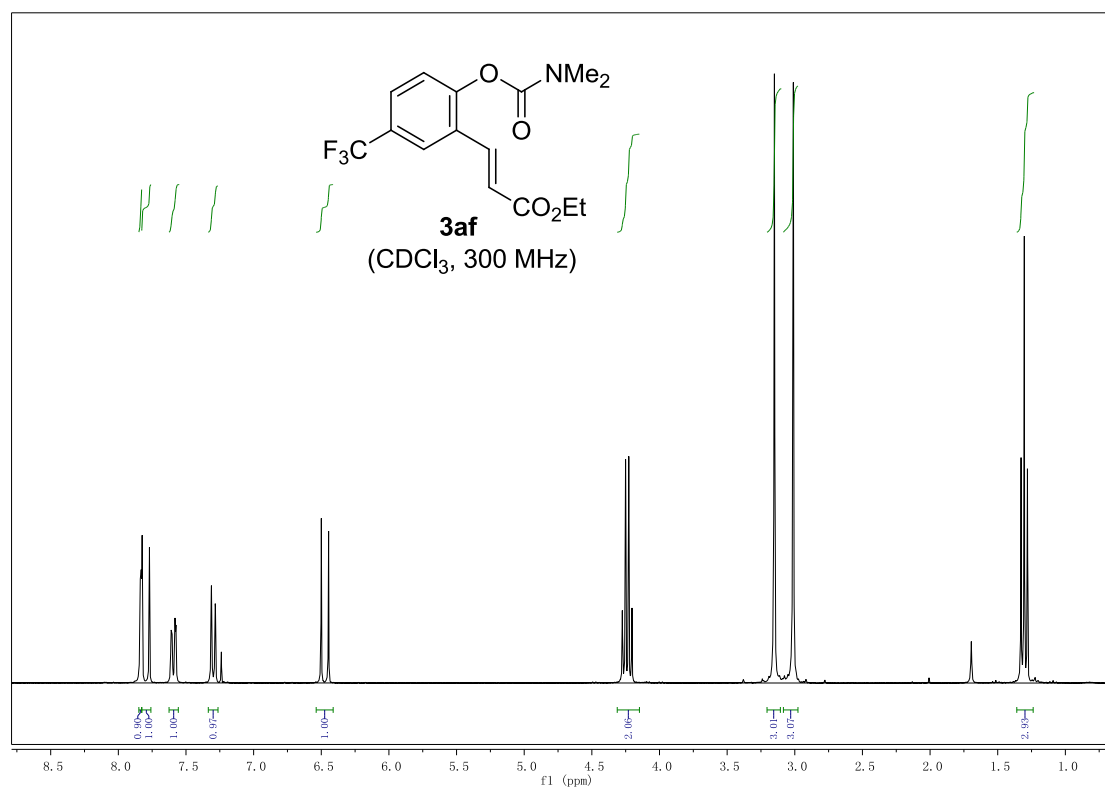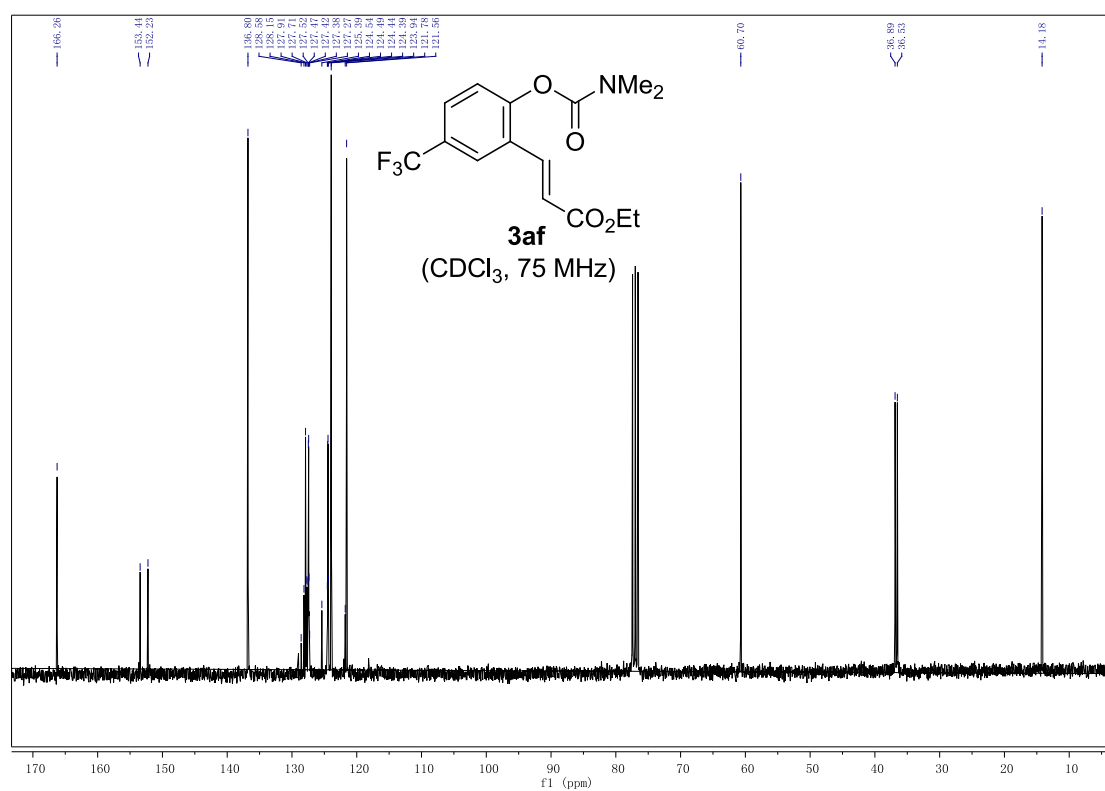

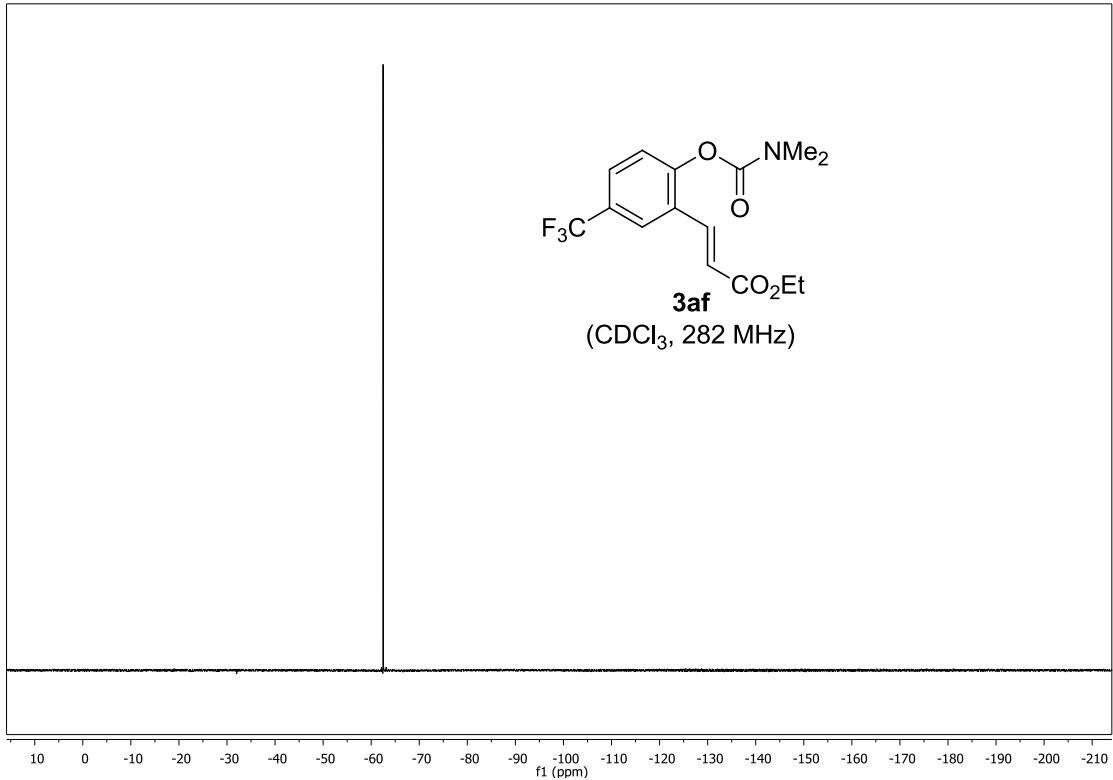

Supplement: c2cc36196e.pdf [file c2cc36196e.pdf]
